# Supplementary material for: Heterocyclic Iminoquinones and Quinones from the National Cancer Institute (NCI, USA) COMPARE Analysis
Source: MDPI journal article supplement (doi:10.3390/molecules28135202), 2023-07-04
Supplement: s1 [file s1]

# Heterocyclic Iminoquinones and Quinones from National Cancer Institute (USA) COMPARE Analysis

Naemah Haji <sup>1‡</sup>, Masoma Faizi <sup>1‡</sup>, Panayiotis A. Koutentis <sup>2</sup>, Michael P. Carty <sup>3</sup> and Fawaz Aldabbagh <sup>1,\*</sup>

<sup>1</sup> Department of Pharmacy, School of Life Sciences, Pharmacy and Chemistry, Kingston University, Penrhyn Road, Kingston upon Thames, KT1 2EE, UK

<sup>2</sup> Department of Chemistry, University of Cyprus, PO Box 20537, 1678 Nicosia, Cyprus

<sup>3</sup> School of Biological and Chemical Sciences, National University of Ireland Galway, University Road, H91 TK33 Galway, Ireland

‡ Equal contributions

\* Correspondence: F.Aldabbagh@kingston.ac.uk

## Supplementary Materials

|                                                                |                   |
|----------------------------------------------------------------|-------------------|
| Correlation of DPIQ (NSC753790) to NQO1                        | <i>Figure S1</i>  |
| Correlation of DPIQ (NSC753790) to <b>3a</b> (NSC84167)        | <i>Figure S2</i>  |
| Correlation of <b>3a</b> (NSC84167) to NQO1                    | <i>Figure S3</i>  |
| Correlation of DPIQ (NSC753790) to <b>4</b> (NSC94945)         | <i>Figure S4</i>  |
| Correlation of <b>4</b> (NSC94945) to NQO1                     | <i>Figure S5</i>  |
| Correlation of <b>5a</b> (NSC768093) to Pleurotin (NSC401005)  | <i>Figure S6</i>  |
| Correlation of <b>5b</b> (NSC780813) to Pleurotin (NSC401005)  | <i>Figure S7</i>  |
| Correlation of <b>5a</b> (NSC768093) to <b>5b</b> (NSC780813)  | <i>Figure S8</i>  |
| Correlation of <b>5c</b> (NSC780816) to Pleurotin (NSC401005)  | <i>Figure S9</i>  |
| Correlation of <b>5a</b> (NSC768093) to <b>5c</b> (NSC780816)  | <i>Figure S10</i> |
| Correlation of <b>5d</b> (NSC780815) to Pleurotin (NSC401005)  | <i>Figure S11</i> |
| Correlation of <b>5a</b> (NSC768093) to <b>5d</b> (NSC780815)  | <i>Figure S12</i> |
| Correlation of DPIQ (NSC753790) to <b>7</b> (NSC643735)        | <i>Figure S13</i> |
| Correlation of <b>7</b> (NSC643735) to NQO1                    | <i>Figure S14</i> |
| Correlation of DPIQ (NSC753790) to <b>8a</b> (NSC795222)       | <i>Figure S15</i> |
| Correlation of <b>8a</b> (NSC795222) to NQO1                   | <i>Figure S16</i> |
| Correlation of DPIQ (NSC753790) to <b>9a</b> (NSC291094)       | <i>Figure S17</i> |
| Correlation of <b>9a</b> (NSC291094) to NQO1                   | <i>Figure S18</i> |
| Correlation of DPIQ (NSC753790) to <b>10a</b> (NSC798710)      | <i>Figure S19</i> |
| Correlation of <b>10a</b> (NSC798710) to NQO1                  | <i>Figure S20</i> |
| Correlation of DPIQ (NSC753790) to <b>10b</b> (NSC798709)      | <i>Figure S21</i> |
| Correlation of <b>10b</b> (NSC798709) to NQO1                  | <i>Figure S22</i> |
| Correlation of DPIQ (NSC753790) to <b>11b</b> (NSC750104)      | <i>Figure S23</i> |
| Correlation of <b>11b</b> (NSC750104) to NQO1                  | <i>Figure S24</i> |
| Correlation of DPIQ (NSC753790) to <b>12</b> (NSC647943)       | <i>Figure S25</i> |
| Correlation of <b>12</b> (NSC647943) to NQO1                   | <i>Figure S26</i> |
| Correlation of <b>5a</b> (NSC768093) to <b>13a</b> (NSC787555) | <i>Figure S27</i> |
| Correlation of <b>13a</b> (NSC787555) to Pleurotin (NSC401005) | <i>Figure S28</i> |
| Correlation of <b>5a</b> (NSC768093) to <b>13b</b> (NSC787553) | <i>Figure S29</i> |
| Correlation of <b>13b</b> (NSC787553) to Pleurotin (NSC401005) | <i>Figure S30</i> |
| Correlation of <b>5a</b> (NSC768093) to <b>13c</b> (NSC787554) | <i>Figure S31</i> |
| Correlation of <b>13c</b> (NSC787554) to Pleurotin (NSC401005) | <i>Figure S32</i> |
| Correlation of <b>5a</b> (NSC768093) to <b>13d</b> (NSC791347) | <i>Figure S33</i> |
| Correlation of <b>13d</b> (NSC791347) to Pleurotin (NSC401005) | <i>Figure S34</i> |
| Correlation of <b>5a</b> (NSC768093) to <b>14a</b> (NSC92937)  | <i>Figure S35</i> |
| Correlation of <b>14a</b> (NSC92937) to Pleurotin (NSC401005)  | <i>Figure S36</i> |
| Correlation of <b>5a</b> (NSC768093) to <b>14b</b> (NSC668844) | <i>Figure S37</i> |
| Correlation of <b>14b</b> (NSC668844) to Pleurotin (NSC401005) | <i>Figure S38</i> |

|                                                                                       |                   |
|---------------------------------------------------------------------------------------|-------------------|
| Correlation of <b>5a</b> (NSC768093) to <b>14c</b> (NSC661222)                        | <i>Figure S39</i> |
| Correlation of <b>14c</b> (NSC661222) to Pleurotin (NSC401005)                        | <i>Figure S40</i> |
| Correlation of <b>5a</b> (NSC768093) to <b>14d</b> (NSC645330)                        | <i>Figure S41</i> |
| Correlation of <b>14d</b> (NSC645330) to Pleurotin (NSC401005)                        | <i>Figure S42</i> |
| Correlation of <b>5a</b> (NSC768093) to <b>14e</b> (NSC661221)                        | <i>Figure S43</i> |
| Correlation of <b>14e</b> (NSC661221) to Pleurotin (NSC401005)                        | <i>Figure S44</i> |
| Correlation of <b>5a</b> (NSC768093) to <b>14f</b> (NSC641396)                        | <i>Figure S45</i> |
| Correlation of <b>14f</b> (NSC641396) to Pleurotin (NSC401005)                        | <i>Figure S46</i> |
| Correlation of <b>5a</b> (NSC768093) to Kalafungin (NSC137443)                        | <i>Figure S47</i> |
| Correlation of Kalafungin (NSC137443) to Pleurotin (NSC401005)                        | <i>Figure S48</i> |
| Correlation of <b>5a</b> (NSC768093) to Nanomycin A (NSC267461)                       | <i>Figure S49</i> |
| Correlation of Nanomycin A (NSC267461) to Pleurotin (NSC401005)                       | <i>Figure S50</i> |
| Correlation of <b>5a</b> (NSC768093) to <b>15a</b> (NSC641401)                        | <i>Figure S51</i> |
| Correlation of <b>15a</b> (NSC641401) to Pleurotin (NSC401005)                        | <i>Figure S52</i> |
| Correlation of <b>5a</b> (NSC768093) to Discorhabdin C (NSC626162)                    | <i>Figure S53</i> |
| Correlation of Discorhabdin C (NSC626162) to Pleurotin (NSC401005)                    | <i>Figure S54</i> |
| Correlation of <b>5a</b> (NSC768093) to <b>9b</b> (NSC682995)                         | <i>Figure S55</i> |
| Correlation of <b>9b</b> (NSC682995) to Pleurotin (NSC401005)                         | <i>Figure S56</i> |
| Correlation of <b>5a</b> (NSC768093) to Melampomagnolide B (MMB) analogue (NSC801078) | <i>Figure S57</i> |
| Correlation of MMB analogue (NSC801078) to Pleurotin (NSC401005)                      | <i>Figure S58</i> |
| Correlation of NQO1 to <b>19</b> (NSC409304)                                          | <i>Figure S59</i> |
| Correlation of <b>19</b> (NSC409304) to DPIQ (NSC753790)                              | <i>Figure S60</i> |
| Correlation of NQO1 to <b>20</b> (NSC2785)                                            | <i>Figure S61</i> |
| Correlation of <b>20</b> (NSC2785) to DPIQ (NSC753790)                                | <i>Figure S62</i> |
| Correlation of NQO1 to <b>21a</b> (NSC783640)                                         | <i>Figure S63</i> |
| Correlation of <b>21a</b> (NSC783640) to DPIQ (NSC753790)                             | <i>Figure S64</i> |
| Correlation of NQO1 to <b>21b</b> (NSC783641)                                         | <i>Figure S65</i> |
| Correlation of <b>21b</b> (NSC783641) to DPIQ (NSC753790)                             | <i>Figure S66</i> |
| Correlation of NQO1 to <b>5a</b> (NSC768093)                                          | <i>Figure S67</i> |
| Correlation of NQO1 to <b>5b</b> (NSC780813)                                          | <i>Figure S68</i> |
| Correlation of NQO1 to Pleurotin (NSC401005)                                          | <i>Figure S69</i> |
| Correlation of NQO1 to <b>14b</b> (NSC668844)                                         | <i>Figure S70</i> |
| Correlation of NQO1 to Kalafungin (NSC137443)                                         | <i>Figure S71</i> |
| Correlation of NQO1 to Discorhabdin C (NSC626162)                                     | <i>Figure S72</i> |
| Correlation of TrxR to <b>5a</b> (NSC768093)                                          | <i>Figure S73</i> |
| Correlation of TrxR to <b>5b</b> (NSC780813)                                          | <i>Figure S74</i> |
| Correlation of TrxR to Pleurotin (NSC401005)                                          | <i>Figure S75</i> |
| Correlation of TrxR to <b>14b</b> (NSC668844)                                         | <i>Figure S76</i> |
| Correlation of TrxR to Kalafungin (NSC137443)                                         | <i>Figure S77</i> |
| Correlation of TrxR to Discorhabdin C (NSC626162)                                     | <i>Figure S78</i> |
| Correlation of TrxR to DPIQ (NSC753790)                                               | <i>Figure S79</i> |
| Correlation of TrxR to <b>3a</b> (NSC84167)                                           | <i>Figure S80</i> |
| Correlation of TrxR to <b>4</b> (NSC94945)                                            | <i>Figure S81</i> |
| Correlation of TrxR to <b>19</b> (NSC409304)                                          | <i>Figure S82</i> |



# COMPARE Analysis of DPIQ (NSC753790) to NQO1

---SEED---

NSC:S753790 Endpoint:GI50 ExpId:AVGDATA logHiConc:-4.0  
Id: 373263 CountExperiments:2

---TARGET---

MoltId:MT22 Genecard:NQO1 TargetSet:MOLTID\_MT\_SERIES

Correlation:0.51

JobId: 2835201994318757494

S753790  
-4M GI50 2d AVGDATA

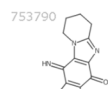

mean/min/max/count  
-5.24 / -6.63 / -4.16 / 60

NQO1  
MT22  
MOLTID\_MT\_SERIES

NQO1

MT22

NQO1  
MT22  
MOLTID\_MT\_SERIES  
mean/min/max/count  
2.52 / 1.48 / 3.78 / 64

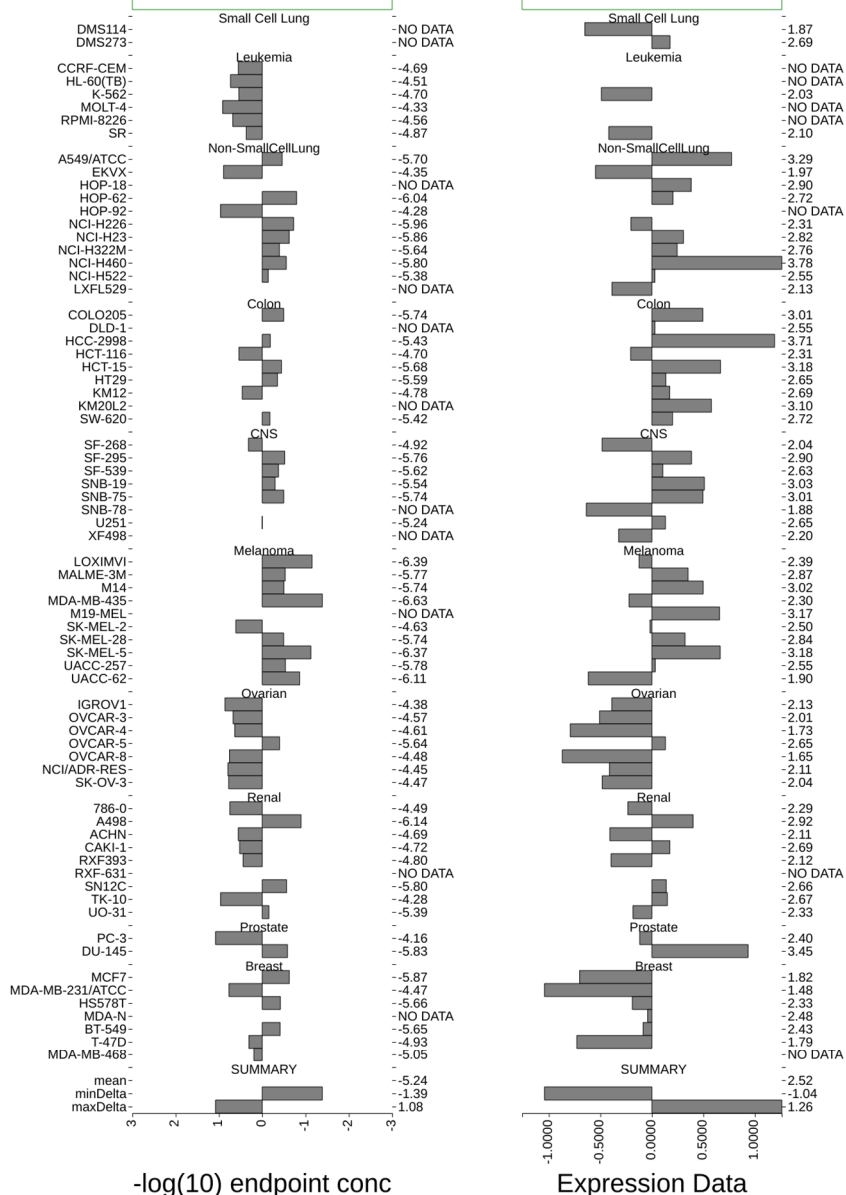

Figure S1

# COMPARE Analysis of DPIQ (NSC753790) to 3a (NSC84167)

---SEED---

NSC:S753790 Endpoint:GI50 ExpId:AVGDATA logHiConc:-4.0  
Id: 373263 Count Experiments:2

---TARGET---

NSC:S84167 Endpoint:GI50 ExpId:AVGDATA logHiConc:-4.0  
Id: 372937 Count Experiments:2

Correlation:0.86

JobId: 8881243693771965163

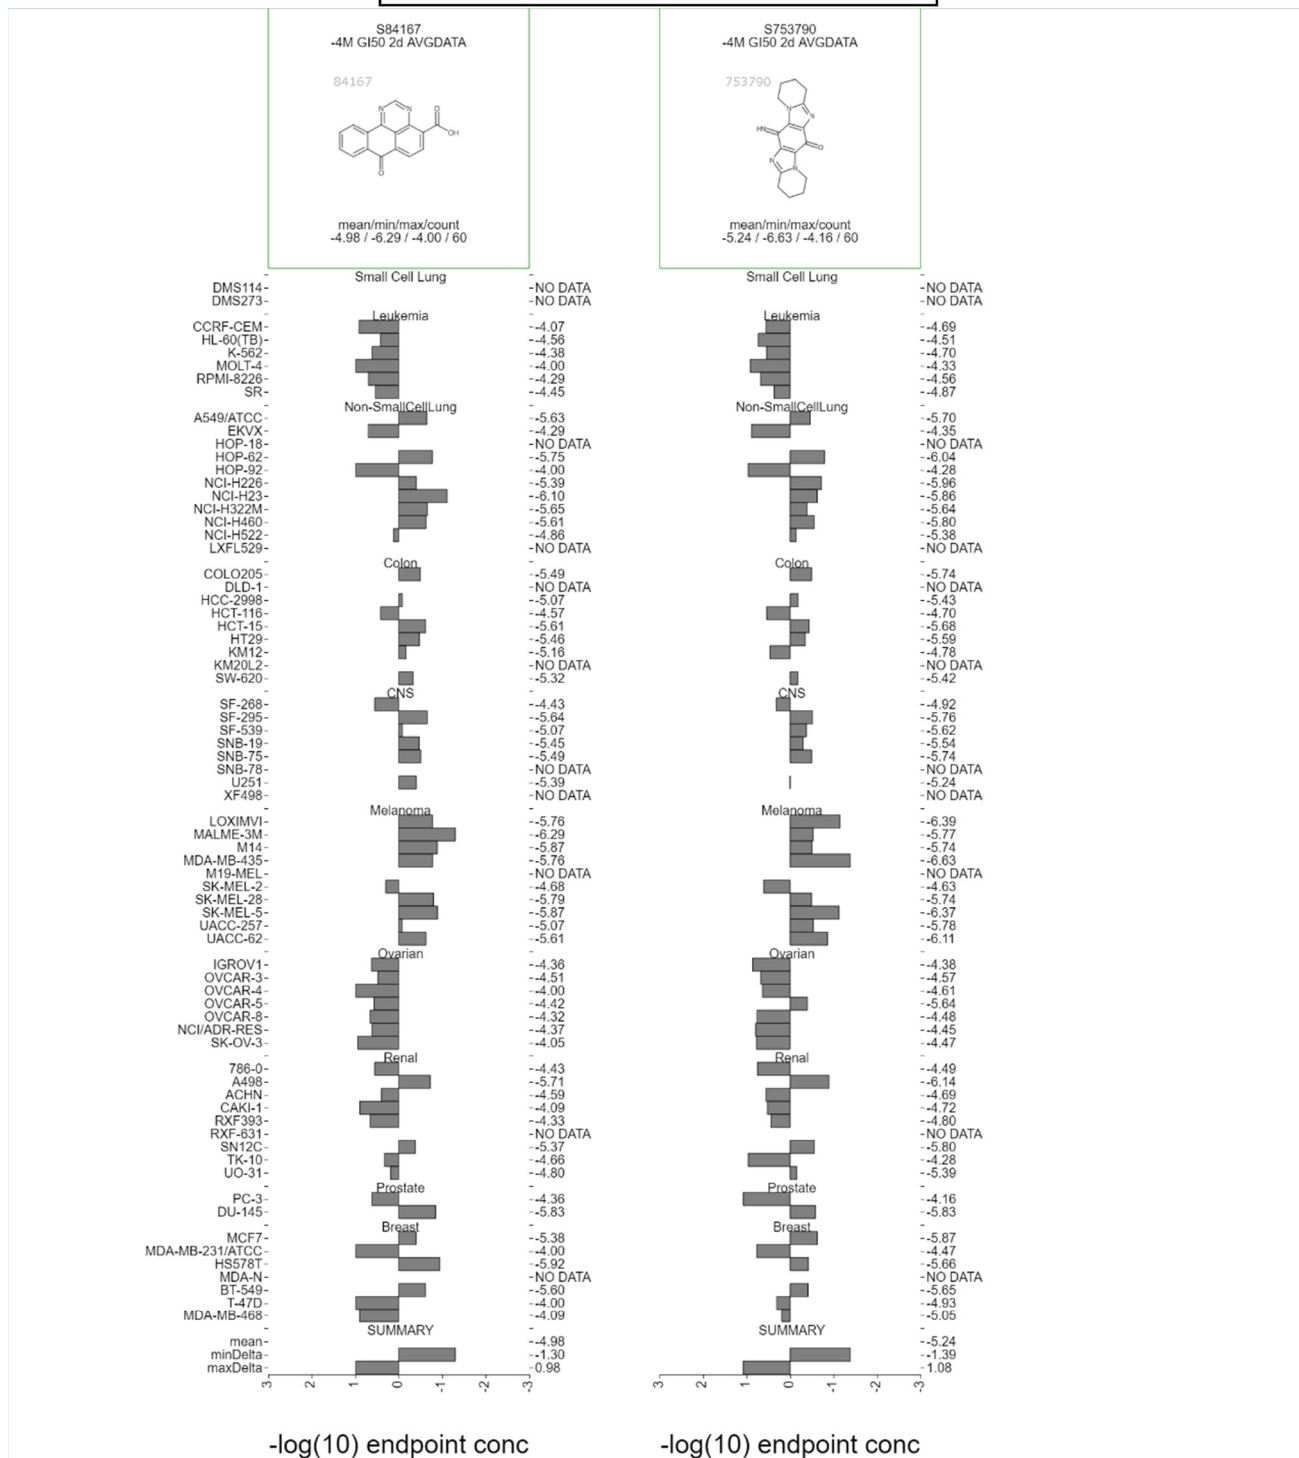

Figure S2

# COMPARE Analysis of 3a (NSC84167) to NQO1

---SEED---

NSC:S84167 Endpoint:GI50 ExpId:AVGDATA logHiConc:-4.0  
Id: 372937 Count Experiments:2

---TARGET---

MolId:MT22 Genecard:NQO1 TargetSet:MOLTID\_MT\_SERIES

Correlation:0.64

JobId: 4809108248135995984

S84167  
-4M GI50 2d AVGDATA

84167

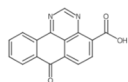

mean/min/max/count  
-4.98 / -6.29 / -4.00 / 60

NQO1  
MT22  
MOLTID\_MT\_SERIES

NQO1

MT22

NQO1  
MT22  
MOLTID\_MT\_SERIES  
mean/min/max/count  
2.52 / 1.48 / 3.78 / 64

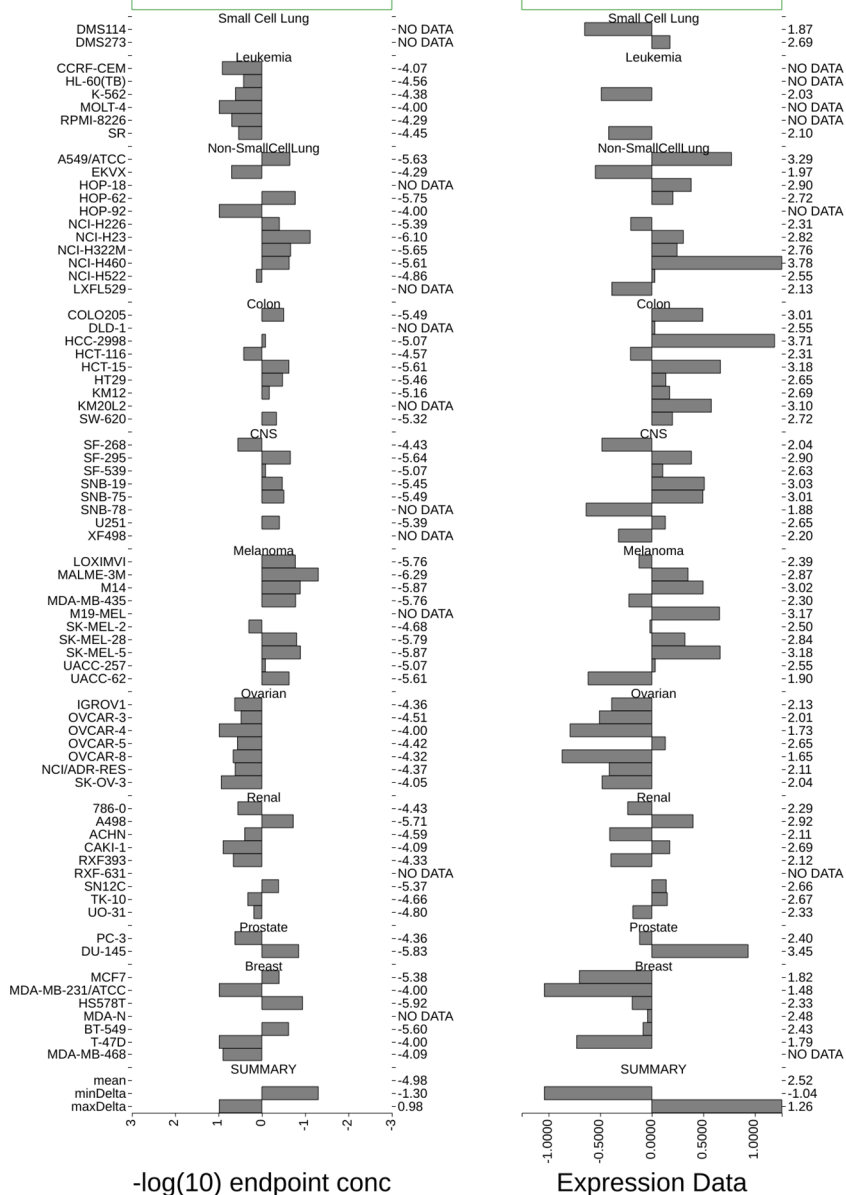

Figure S3

# COMPARE Analysis of DPIQ (NSC753790) to 4 (NSC94945)

---SEED---

NSC: S753790 Endpoint: GI50 ExpId: AVGDATA logHiConc: -4.0  
Id: 373263 Count Experiments: 2

---TARGET---

NSC: S94945 Endpoint: GI50 ExpId: AVGDATA logHiConc: -4.0  
Id: 11715 Count Experiments: 2

Correlation: 0.77

JobId: 8226154143438375649

S94945  
-4M GI50 2d AVGDATA

94945

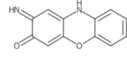

mean/min/max/count  
-5.44 / -6.29 / -4.35 / 59

S753790  
-4M GI50 2d AVGDATA

753790

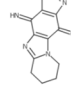

mean/min/max/count  
-5.24 / -6.63 / -4.16 / 60

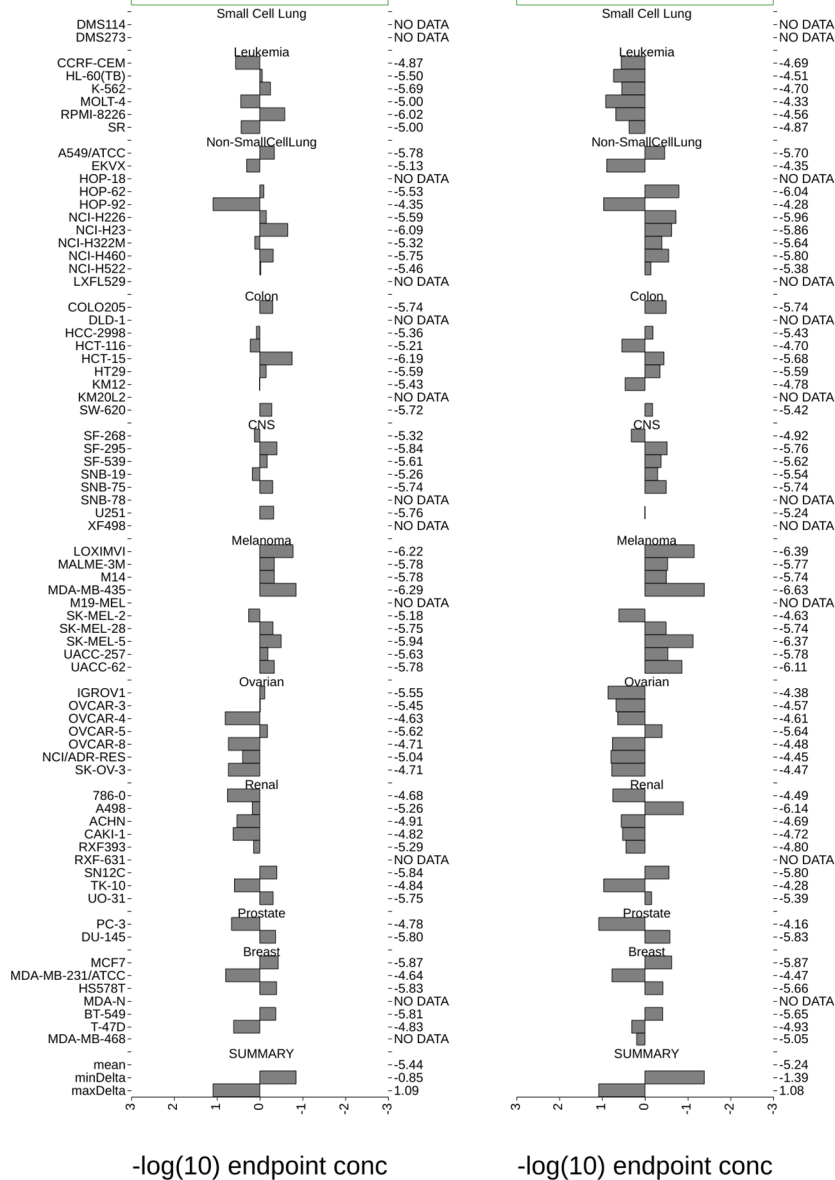

Figure S4

# COMPARE Analysis of 4 (NSC94945) to NQO1

---SEED---

NSC: S94945 Endpoint: GI50 ExpId: AVGDATA logHiConc: 4.0  
Id: 11715 Count Experiments: 2

---TARGET---

MoltId: MT22 Genecard: NQO1 TargetSet: MOLTID\_MT\_SERIES

Correlation: 0.47

JobId: 8449072155707022498

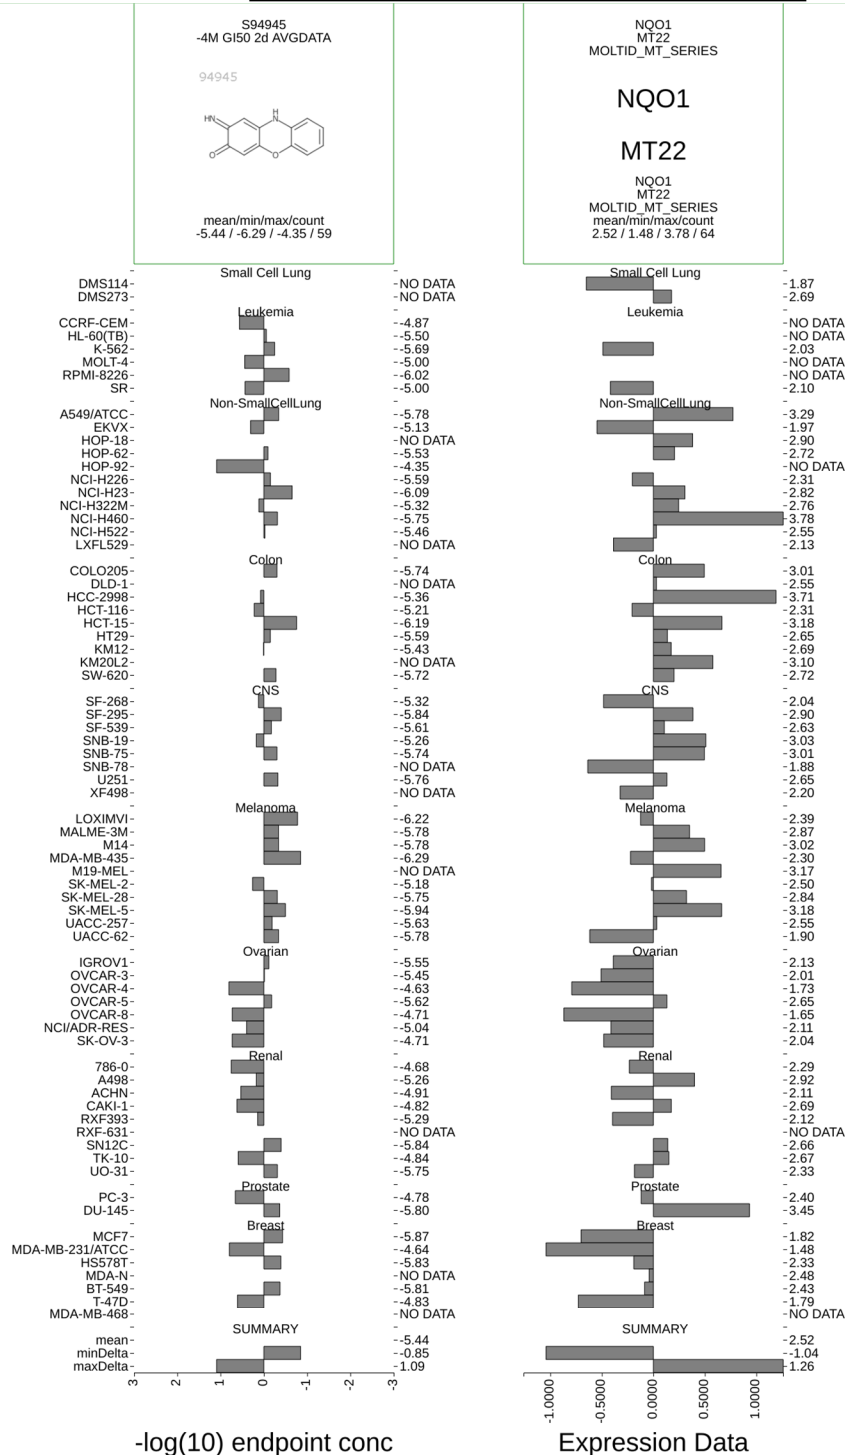

Figure S5

# COMPARE Analysis of 5a (NSC768093) to Pleurotin (NSC401005)

---SEED---

NSC:S768093 Endpoint:GI50 ExpId:AVGDATAlogHiConc:-4.0  
Id: 253700 CountExperiments:2

---TARGET---

NSC:S401005 Endpoint:GI50 ExpId:AVGDATAlogHiConc:-4.0  
Id: 243481 CountExperiments:2

Correlation:0.84

JobId: 8898937600775438742

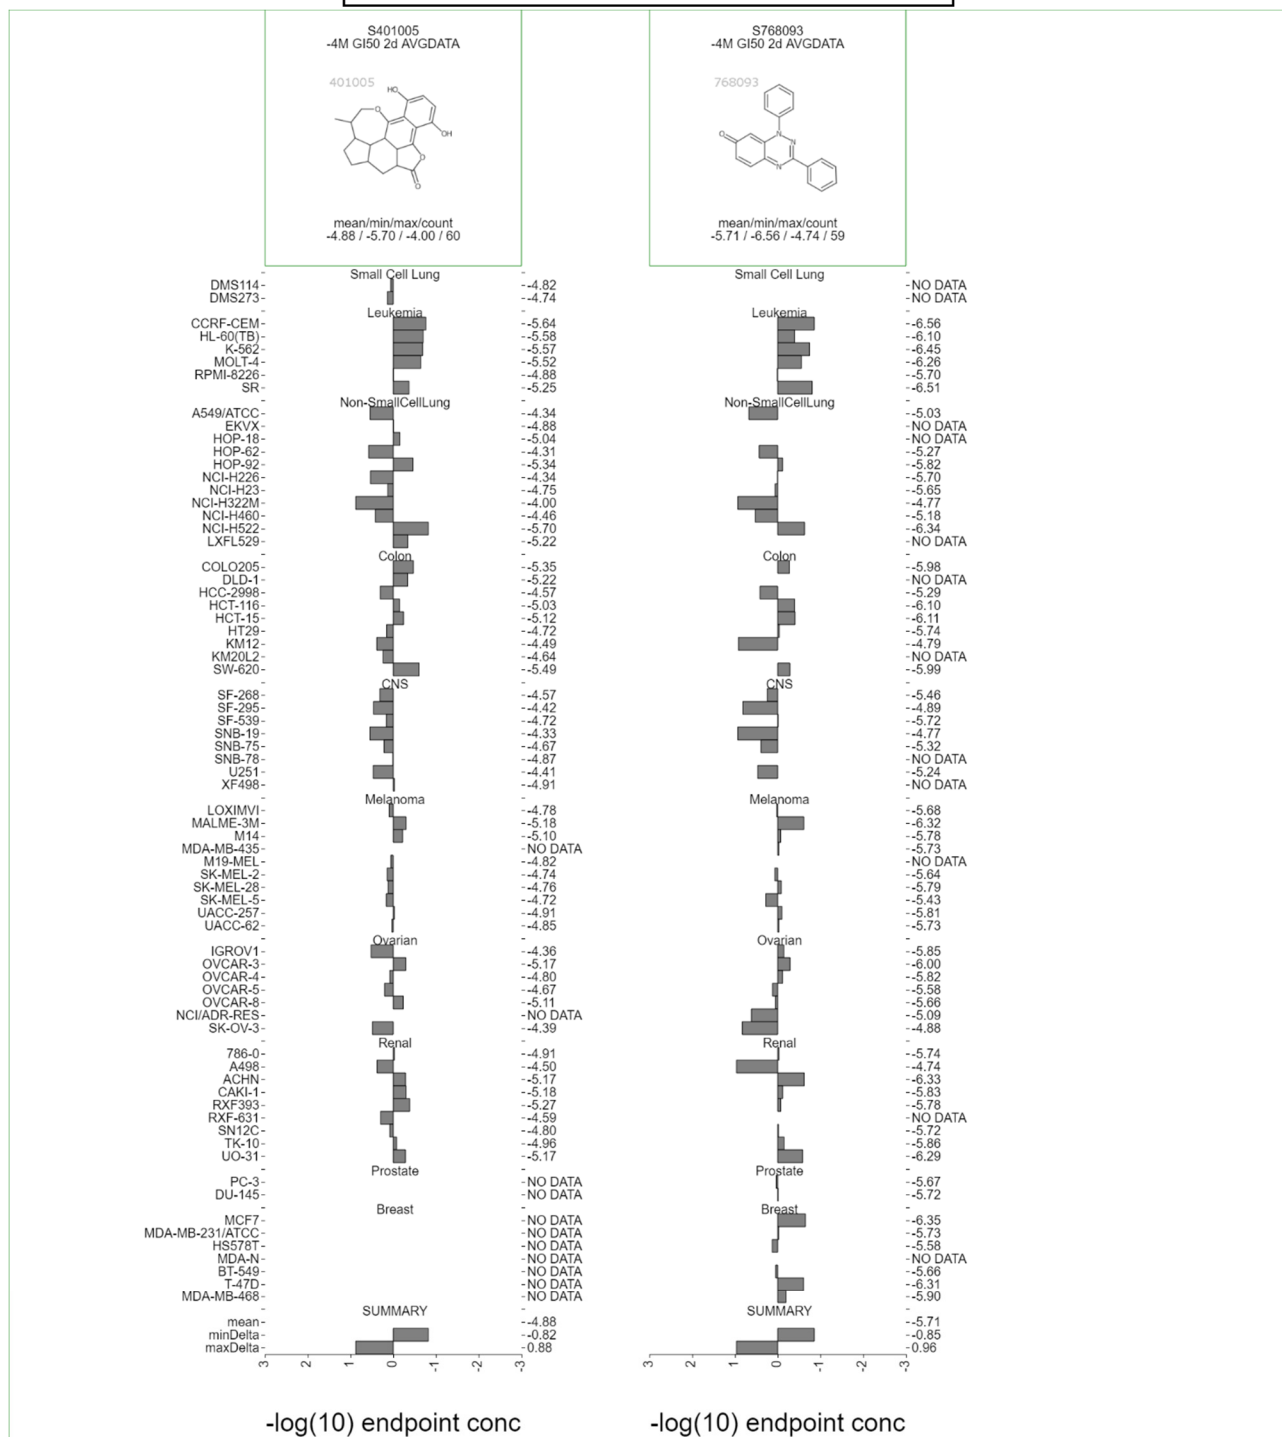

Figure S6

# COMPARE Analysis of 5b (NSC780813) to Pleurotin (NSC401005)

---SEED---

NSC:S780813 Endpoint:GI50 ExpId:AVGDATAlogHiConc:-4.0  
Id: 314185 Count Experiments:1

---TARGET---

NSC:S401005 Endpoint:GI50 ExpId:AVGDATAlogHiConc:-4.0  
Id: 243481 Count Experiments:2

Correlation:0.80

JobId: 4376827337522088035

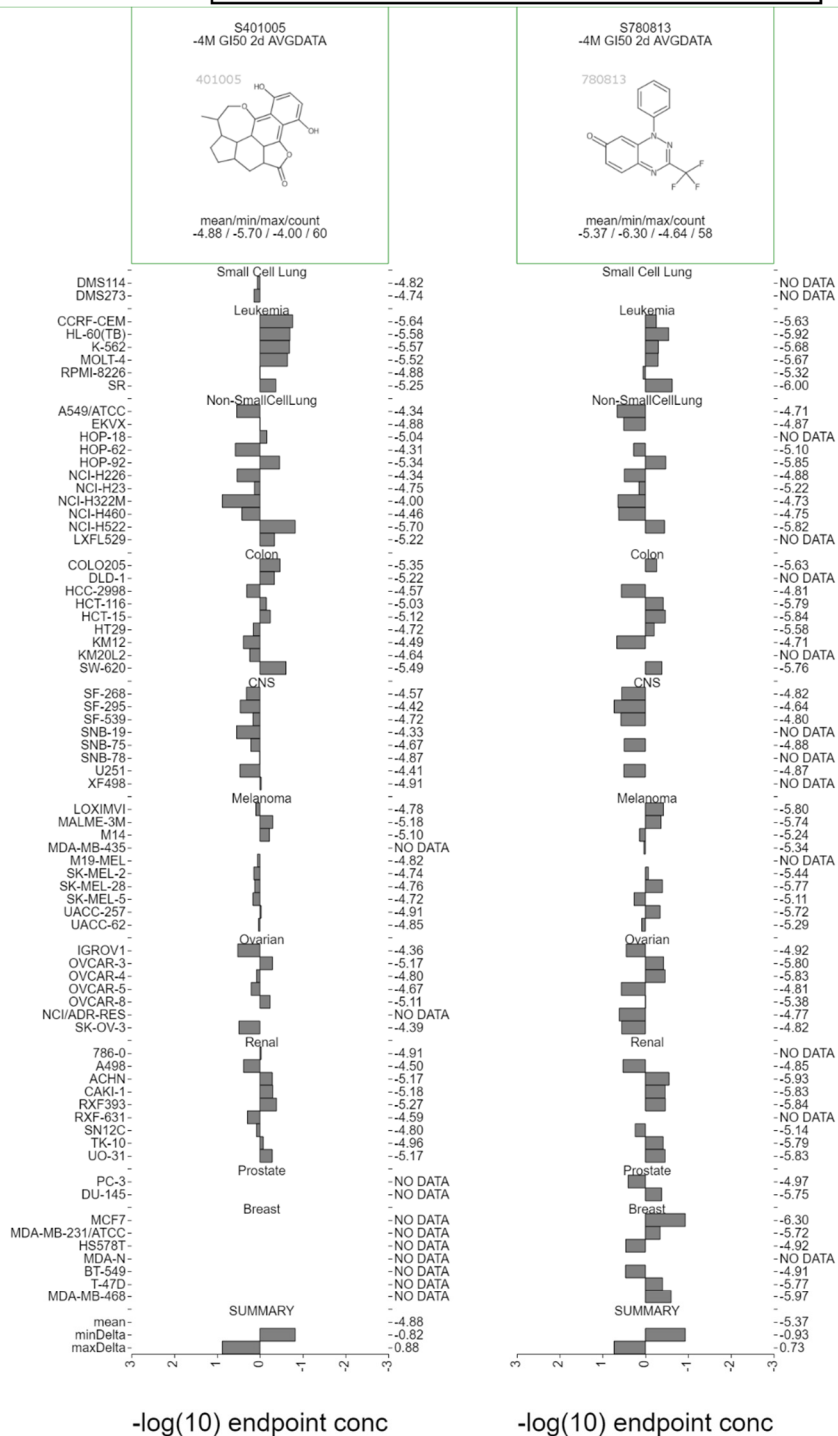

Figure S7

# COMPARE Analysis of 5a (NSC768093) to 5b (NSC780813)

---SEED---

NSC:768093 Endpoint:GI50 ExpId:AVGDATA logHiConc:-4.0  
Id: 253700 CountExperiments:2

---TARGET---

NSC:780813 Endpoint:GI50 ExpId:AVGDATA logHiConc:-4.0  
Id: 314185 CountExperiments:1

Correlation:0.80

JobId: 178613746223602897

S768093  
-4M GI50 2d AVGDATA

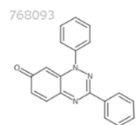

mean/min/max/count  
-5.71 / -6.56 / -4.74 / 59

S780813  
-4M GI50 2d AVGDATA

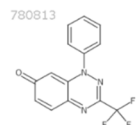

mean/min/max/count  
-5.37 / -6.30 / -4.64 / 58

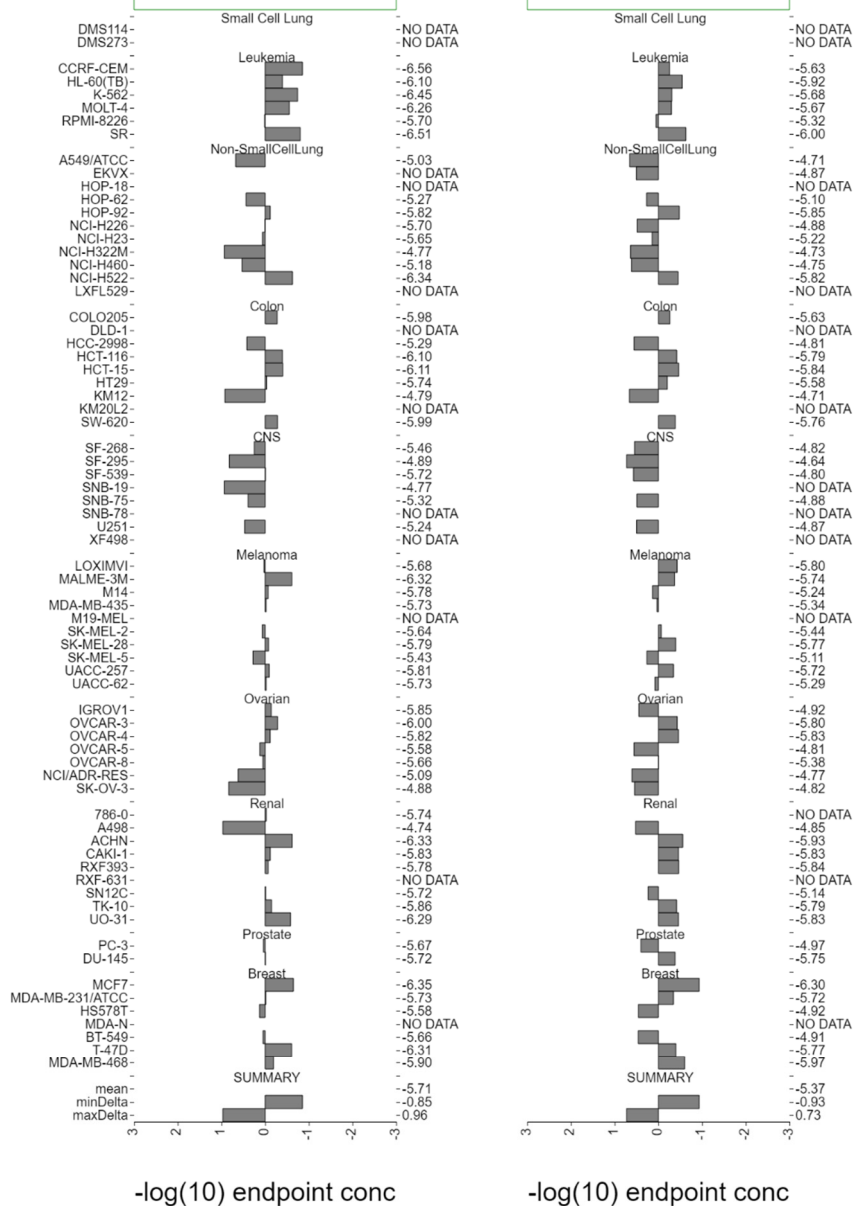

Figure S8



# COMPARE Analysis of 5c (NSC780816) to Pleurotin (NSC401005)

---SEED---

NSC:S780816 Endpoint:GI50 ExpId:AVGDATAlogHiConc:-4.0  
Id: 132828 Count Experiments:1

---TARGET---

NSC:S401005 Endpoint:GI50 ExpId:AVGDATAlogHiConc:-4.0  
Id: 243481 Count Experiments:2

Correlation:0.84

JobId: 9115622029100680995

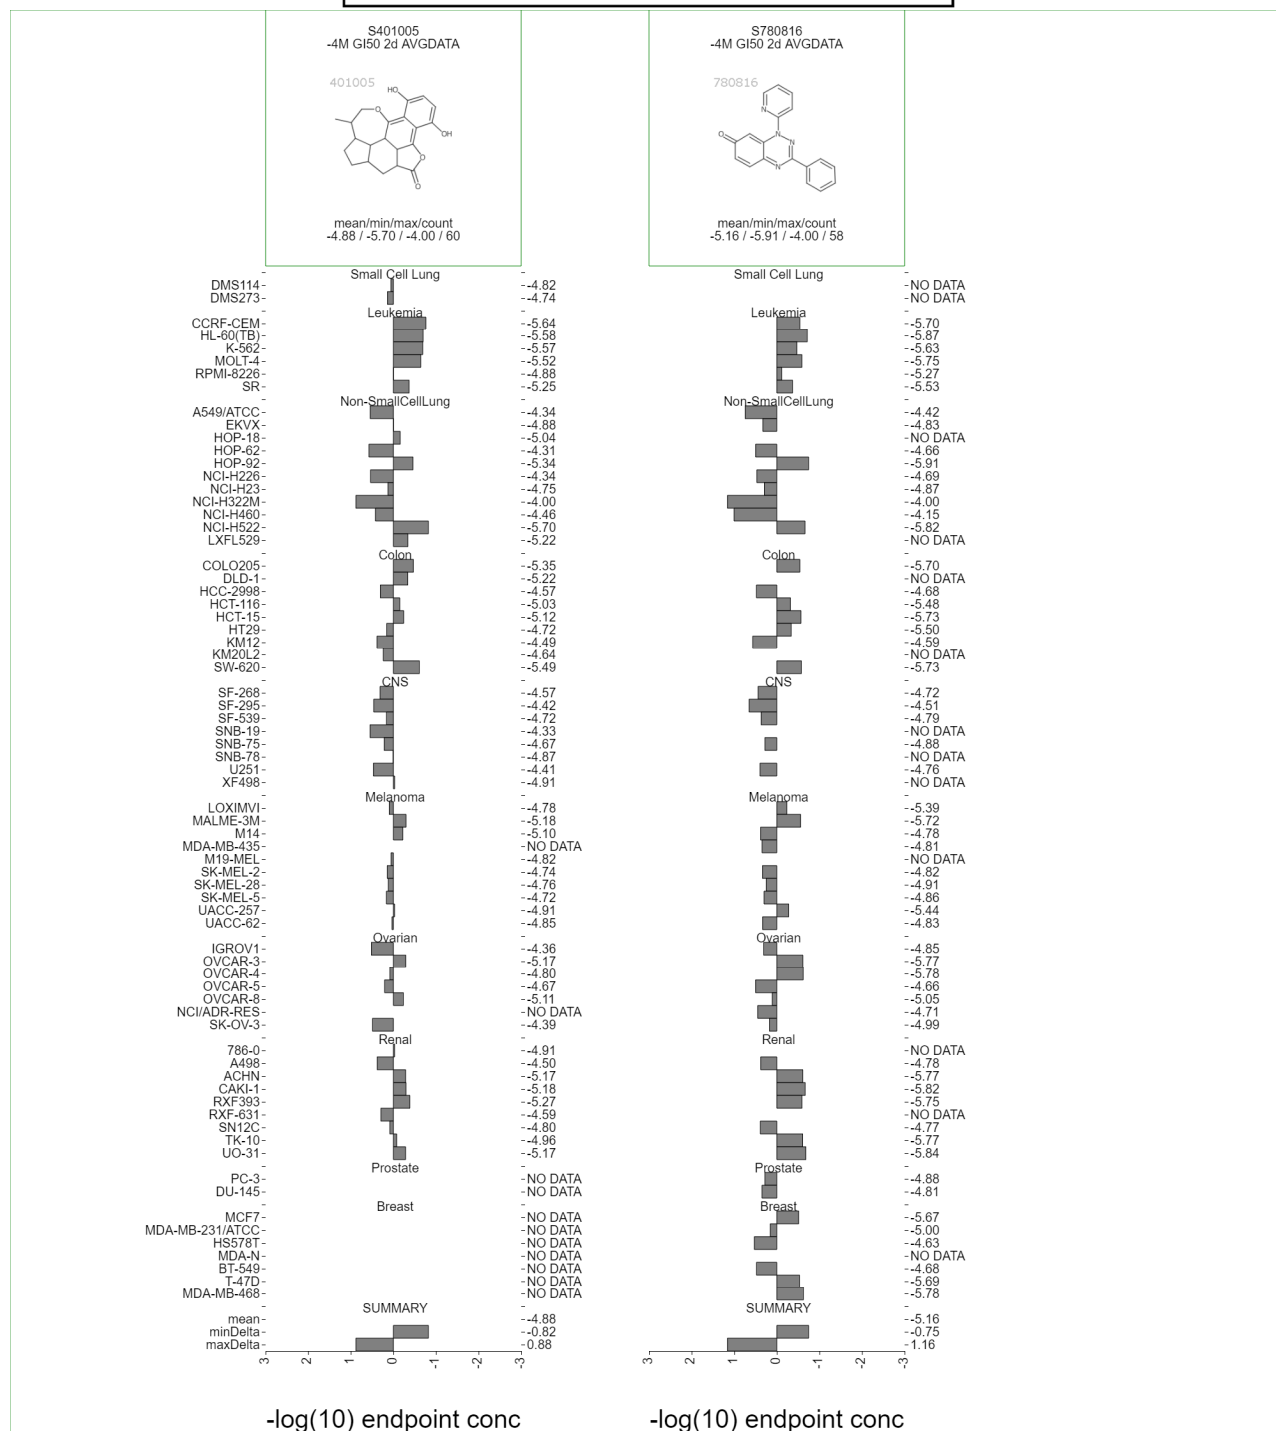

Figure S9

# COMPARE Analysis of 5a (NSC768093) to 5c (NSC780816)

---SEED---

NSC:768093 Endpoint:GI50 ExpId:AVGDATA logHiConc:-4.0  
Id: 253700 Count Experiments:2

---TARGET---

NSC:780816 Endpoint:GI50 ExpId:AVGDATA logHiConc:-4.0  
Id: 132828 Count Experiments:1

Correlation:0.78

JobId: 4300782396264764936

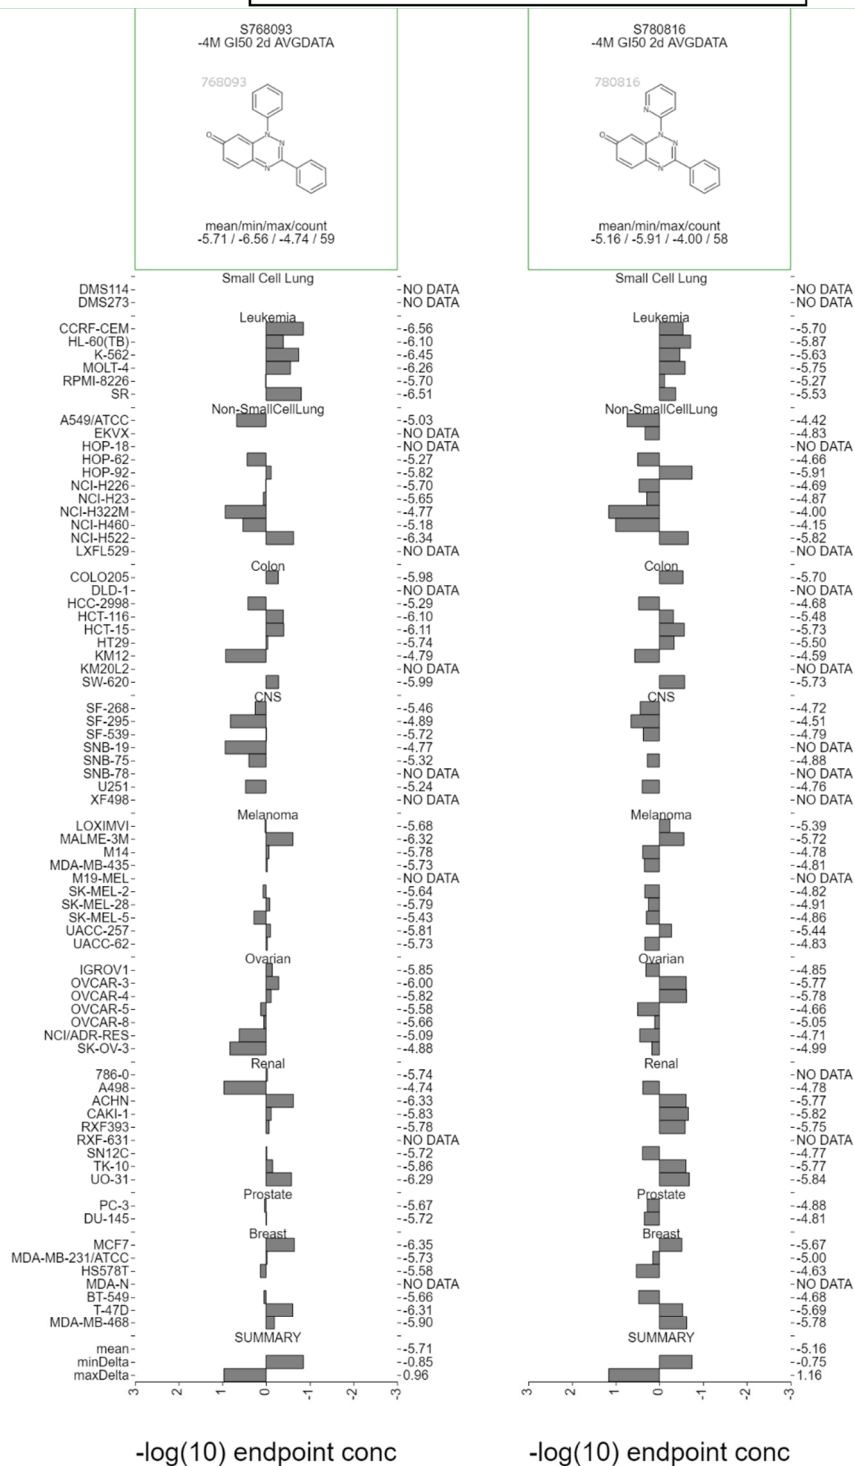

Figure S10

COMPARE Analysis of **5d** (NSC780815) to Pleurotin (NSC401005)

---

---SEED---

NSC:S780815 Endpoint:GI50 ExpId:AVGDATAl ogHiConc:-4.0  
Id: 12861 CountExperiments:1

---TARGET---

NSC:S401005 Endpoint:GI50 ExpId:AVGDATAl ogHiConc:-4.0  
Id: 243481 CountExperiments:2

Correlation:0.73  
JobId: 8698170618292679257

NSC:S780815 Endpoint:GI50 ExpId:AVGDATAlogHiConc:-4.0

---TARGET---

**Id: 243481 Count Experiments: 2**

JobId: 8698170618292679257

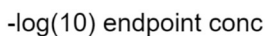

Figure S11

# COMPARE Analysis of 5a (NSC768093) to 5d (NSC780815)

---SEED---

NSC:768093 Endpoint:GI50 ExpId:AVGDATA logHiConc:-4.0  
Id: 253700 Count Experiments:2

---TARGET---

NSC:780815 Endpoint:GI50 ExpId:AVGDATA logHiConc:-4.0  
Id: 12861 Count Experiments:1

Correlation:0.83

JobId: 7840953164841129662

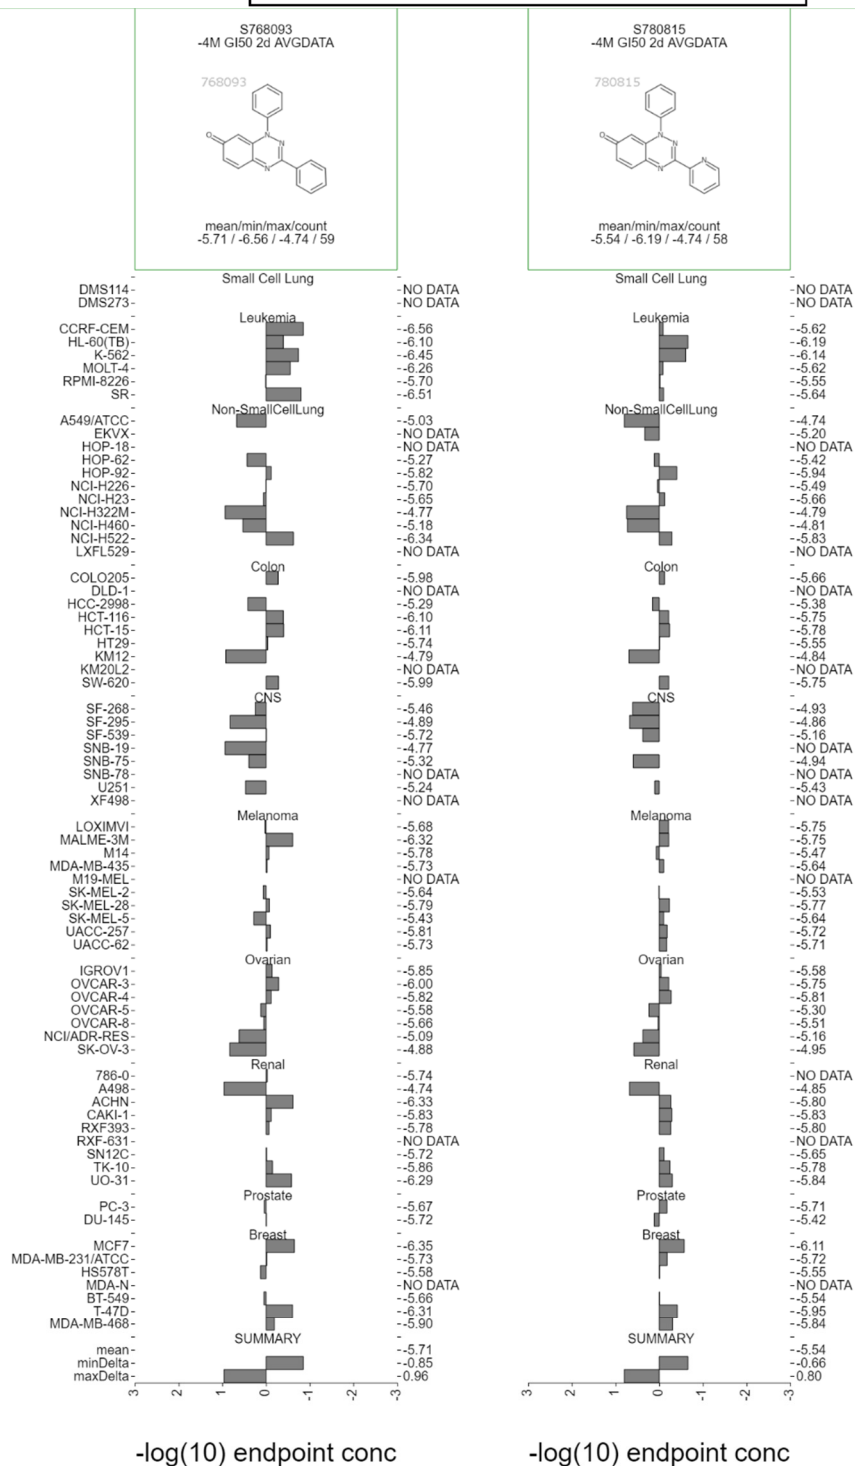

Figure S12

# COMPARE Analysis of DPIQ (NSC753790) to 7 (NSC643735)

---SEED---

NSC:5753790 Endpoint:GI50 ExpId:AVGDATA logHiConc:-4.0  
Id: 373263 Count Experiments: 2

---TARGET---

NSC:5643735 Endpoint:GI50 ExpId:AVGDATA logHiConc:-4.0  
Id: 243352 Count Experiments: 6

Correlation: 0.74

JobId: 161200439757879132

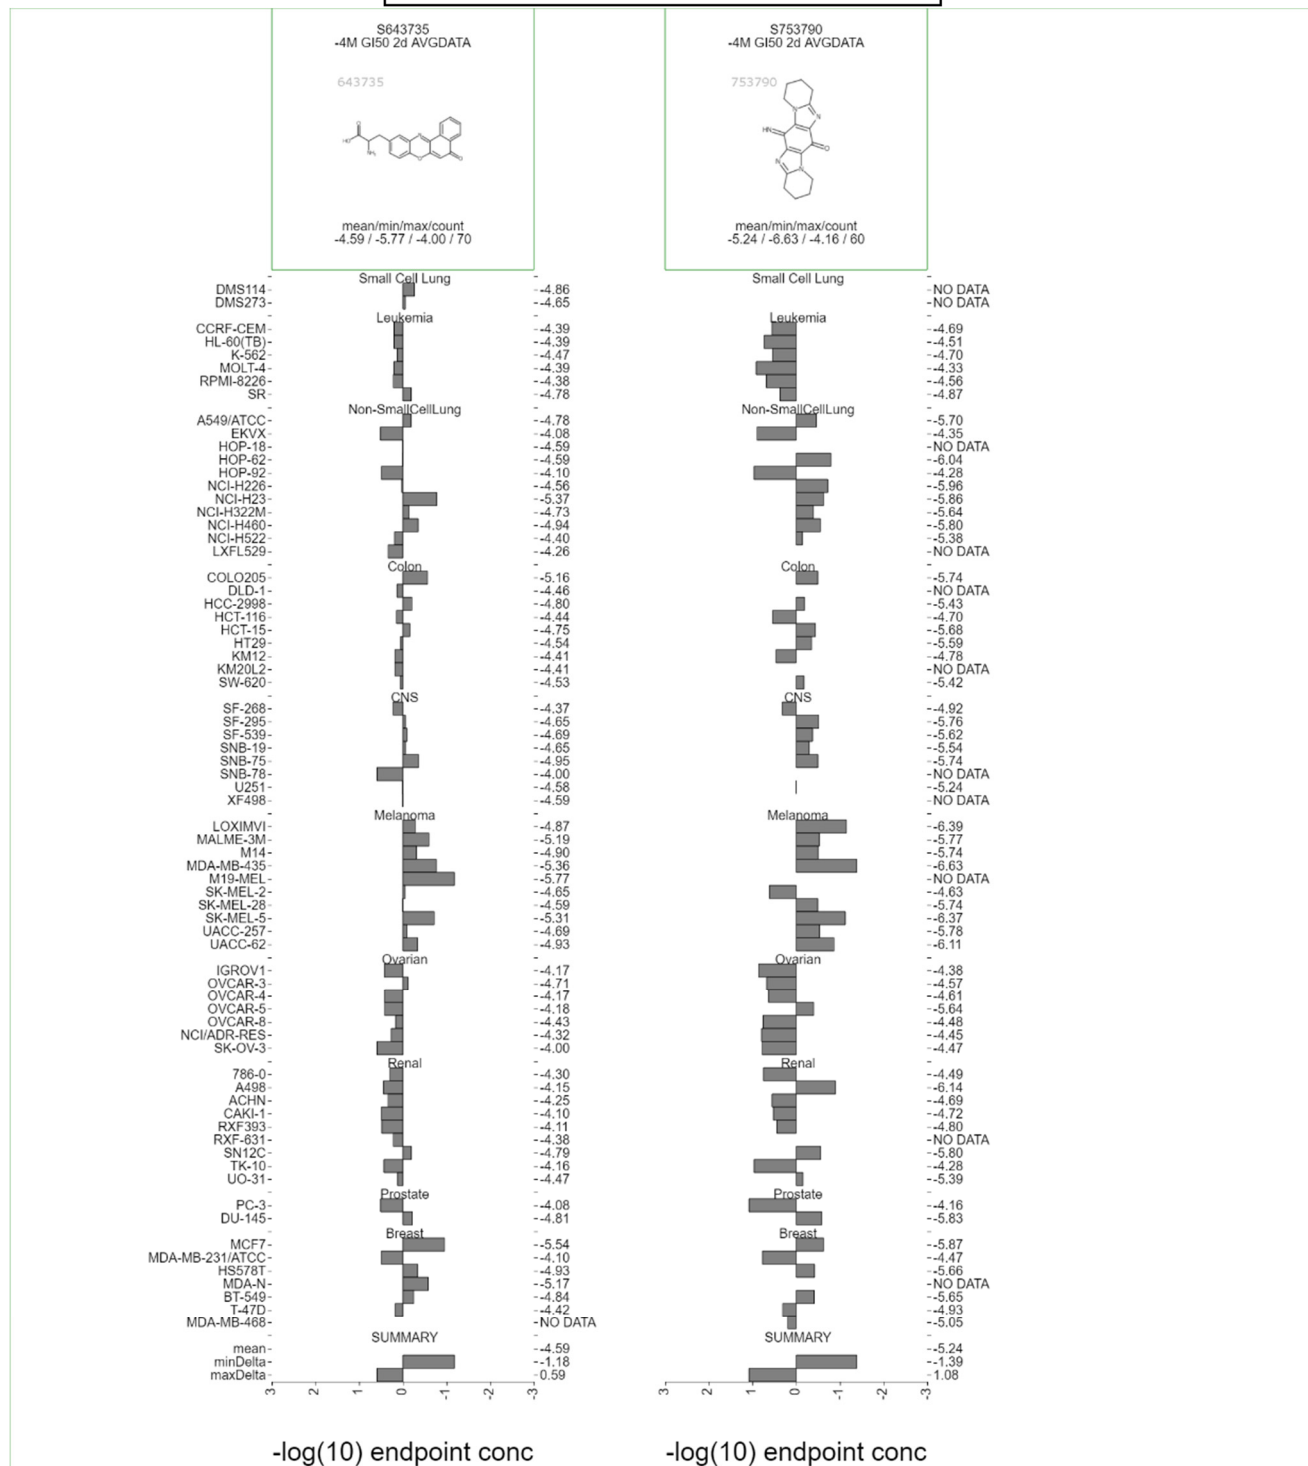

Figure S13

# COMPARE Analysis of 7 (NSC643735) to NQO1

---SEED---

NSC:S643735 Endpoint:GI50 ExpId:AVGDATA logHiConc:-4.0  
Id: 243352 CountExperiments:6

---TARGET---

MoltId:MT22 Genecard:NQO1 TargetSet:MOLTID\_MT\_SERIES

Correlation:0.38

JobId:9083362337997199411

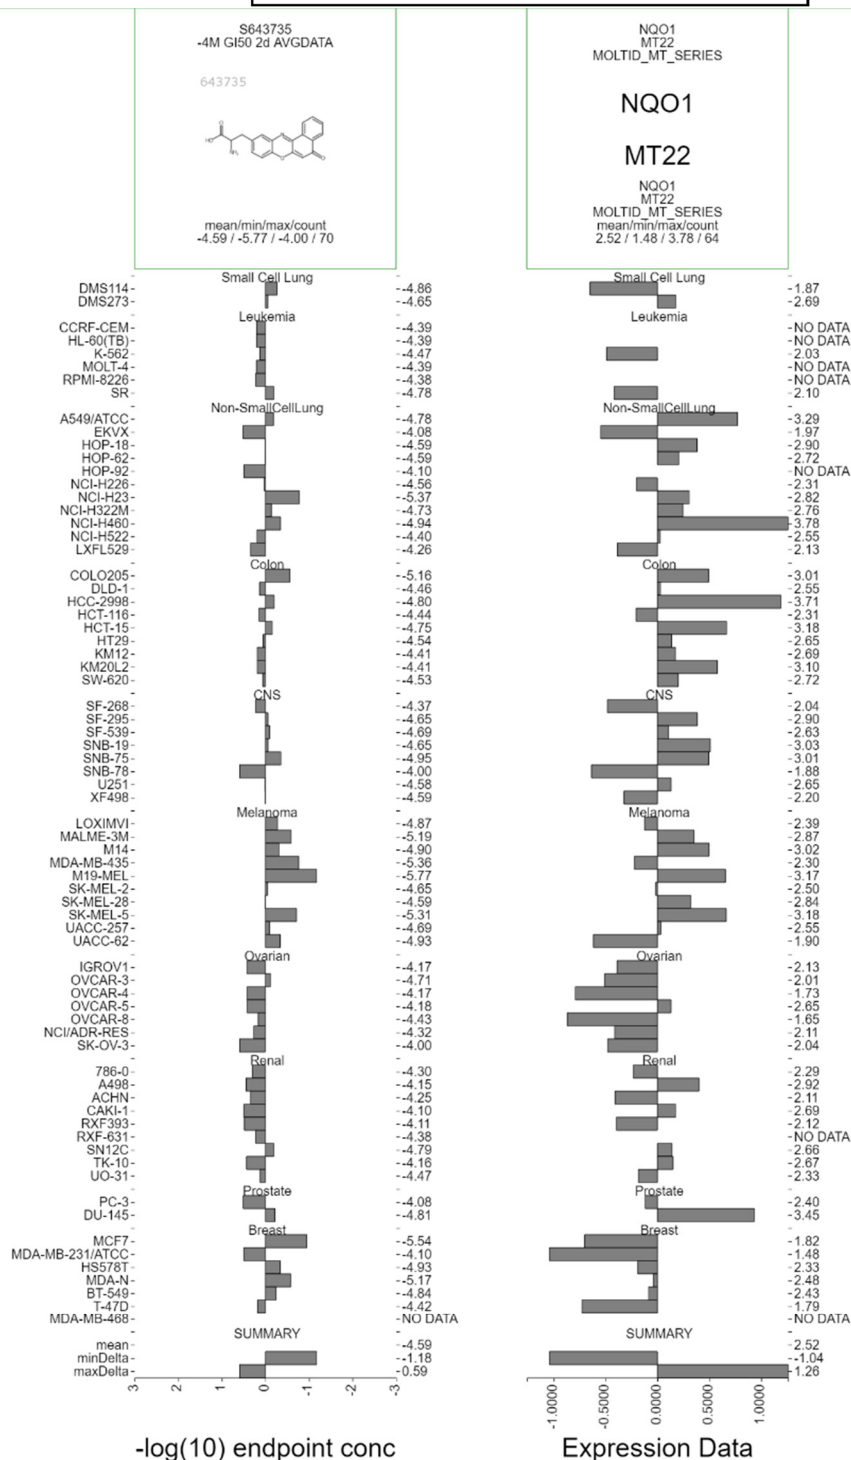

Figure S14

# COMPARE Analysis of DPIQ (NSC753790) to 8a (NSC795222)

---SEED---

NSC:753790 Endpoint:GI50 ExpId:AVGDATA logHiConc:-4.0  
Id: 373263 Count Experiments:2

---TARGET---

NSC:795222 Endpoint:GI50 ExpId:AVGDATA logHiConc:-4.0  
Id: 13092 Count Experiments:2

Correlation:0.81

JobId: 850257062471574592

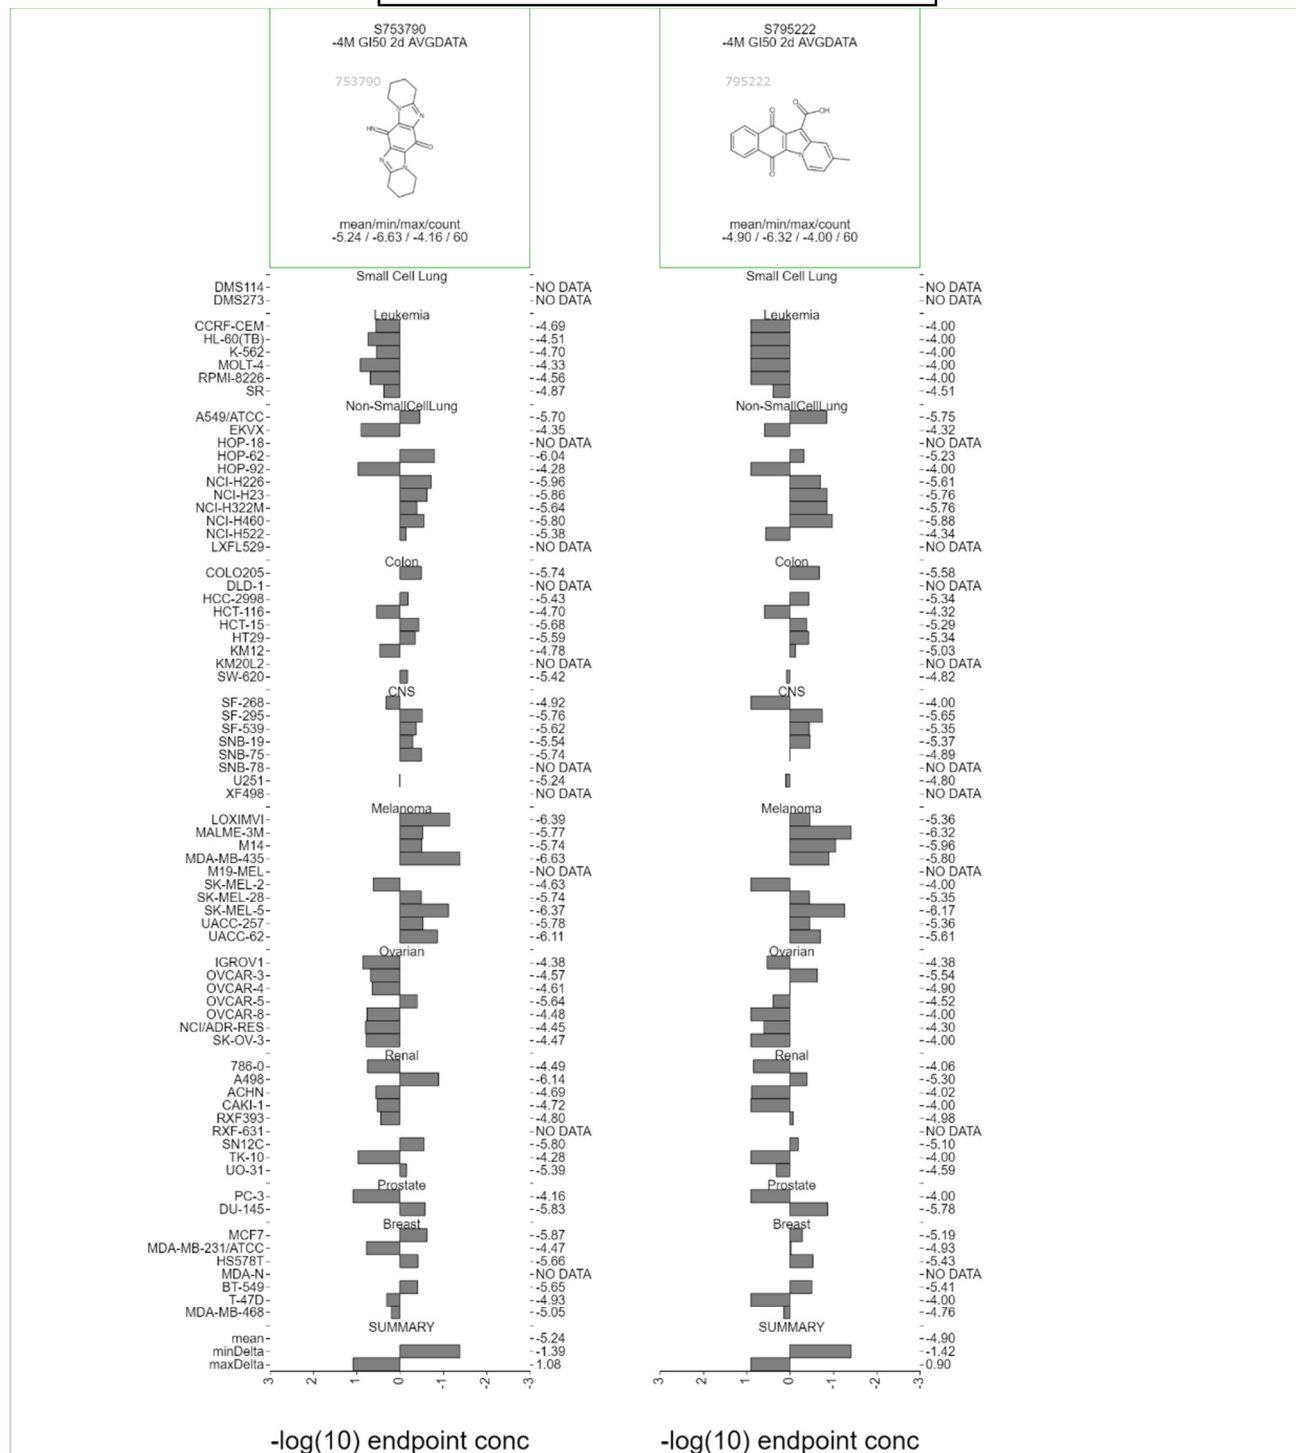

Figure S15

# COMPARE Analysis of 8a (NSC795222) to NQO1

---SEED---

NSC:S795222 Endpoint:GI50 ExpId:AVGDATA logHiConc:-4.0  
Id: 13092 CountExperiments:2

---TARGET---

MoltId:MT22 Genecard:NQO1 TargetSet:MOLTID\_MT\_SERIES

Correlation:0.53

JobId: 5161239735822820917

S795222  
-4M GI50 2d AVGDATA

795222

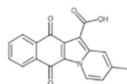

mean/min/max/count  
-4.90 / -6.32 / -4.00 / 60

NQO1  
MT22  
MOLTID\_MT\_SERIES

NQO1

MT22

NQO1  
MT22  
MOLTID\_MT\_SERIES  
mean/min/max/count  
2.52 / 1.48 / 3.78 / 64

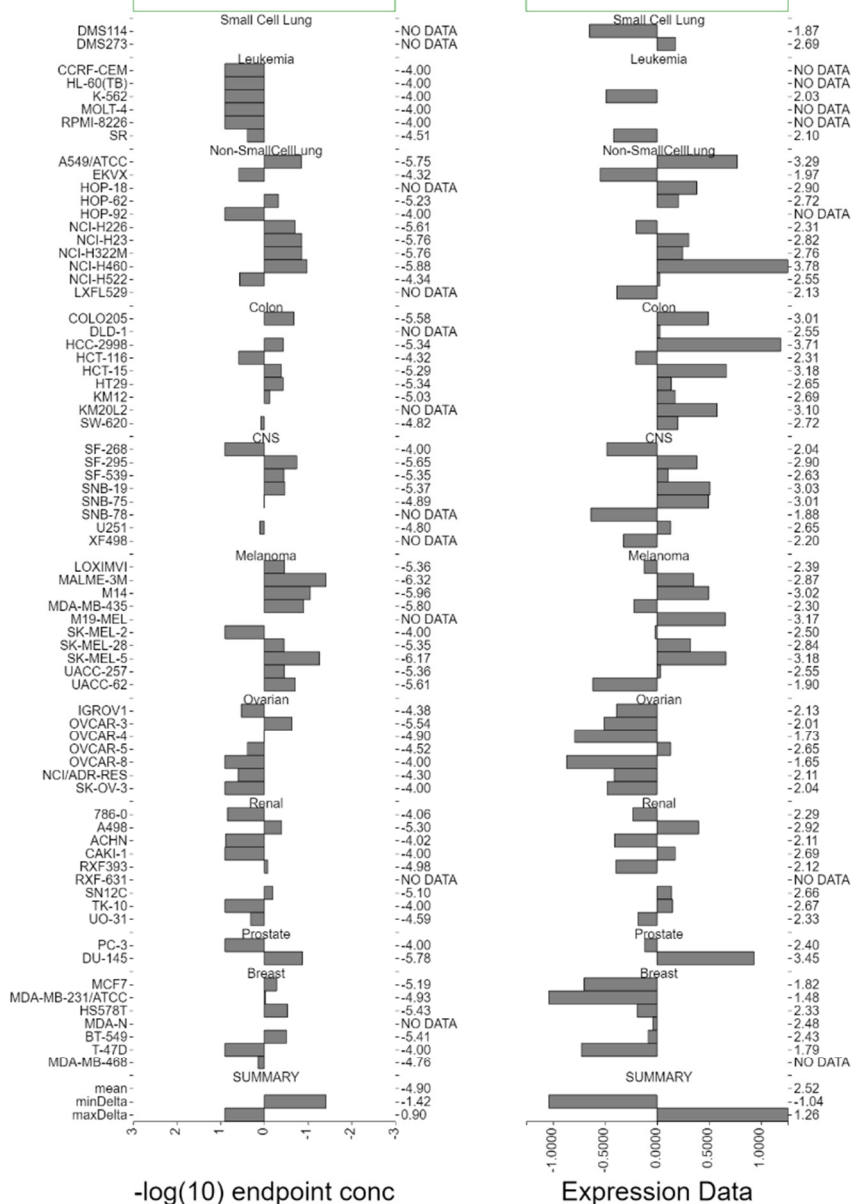

Figure S16



# COMPARE Analysis of DPIQ (NSC753790) to 9a (NSC291094)

---SEED---

NSC:753790 Endpoint:GI50 Expld:AVGDATA logHiConc:-4.0  
Id: 373263 Count Experiments: 2

---TARGET---

NSC:291094 Endpoint:GI50 Expld:AVGDATA logHiConc:-4.0  
Id: 193856 Count Experiments: 1

Correlation: 0.80

JobId: 5900945876456588451

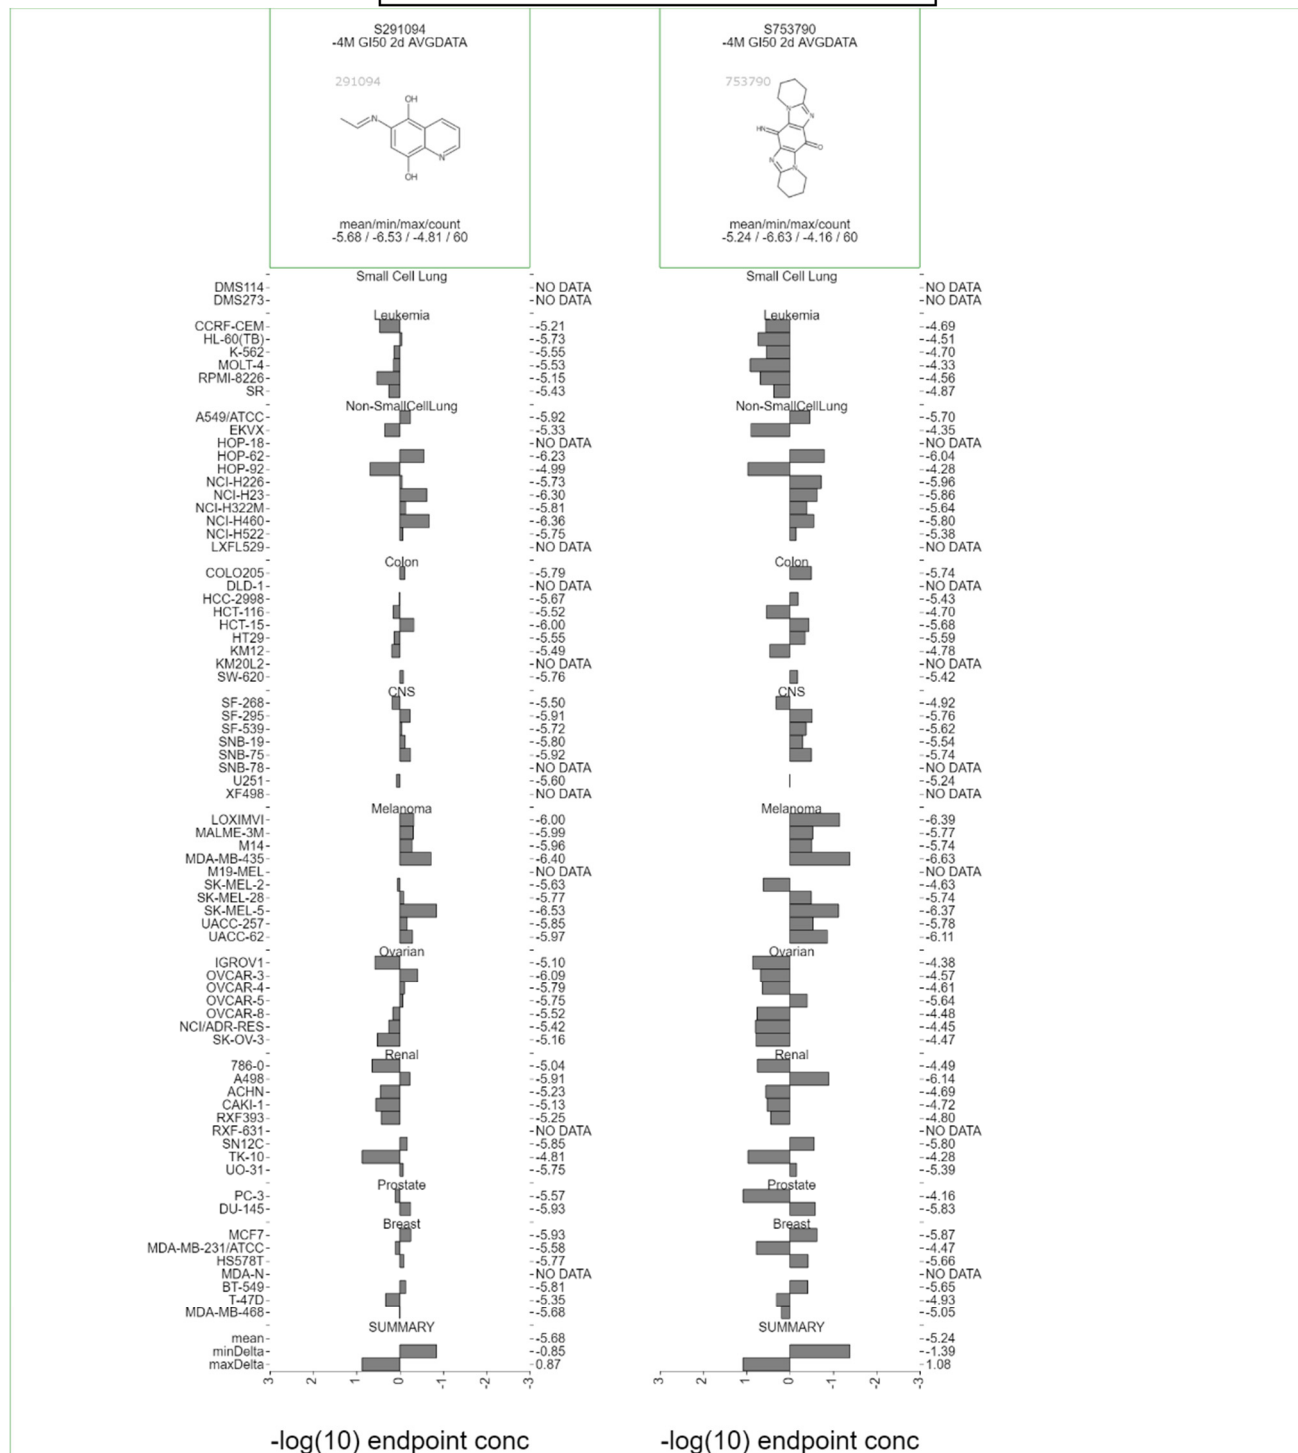

Figure S17

# COMPARE Analysis of 9a (NSC291094) to NQO1

---SEED---

NSC:S291094 Endpoint:GI50 ExpId:AVGDATA logHiConc:-4.0  
Id: 193856 Count Experiments:1

---TARGET---

MoltId:MT22 Genecard:NQO1 TargetSet:MOLTID\_MT\_SERIES

Correlation:0.42

JobId: 3132994177876046533

S291094  
-4M GI50 2d AVGDATA

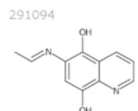

mean/min/max/count  
-5.68 / -6.53 / -4.81 / 60

NQO1  
MT22  
MOLTID\_MT\_SERIES

NQO1

MT22

NQO1  
MT22  
MOLTID\_MT\_SERIES  
mean/min/max/count  
2.52 / 1.48 / 3.78 / 64

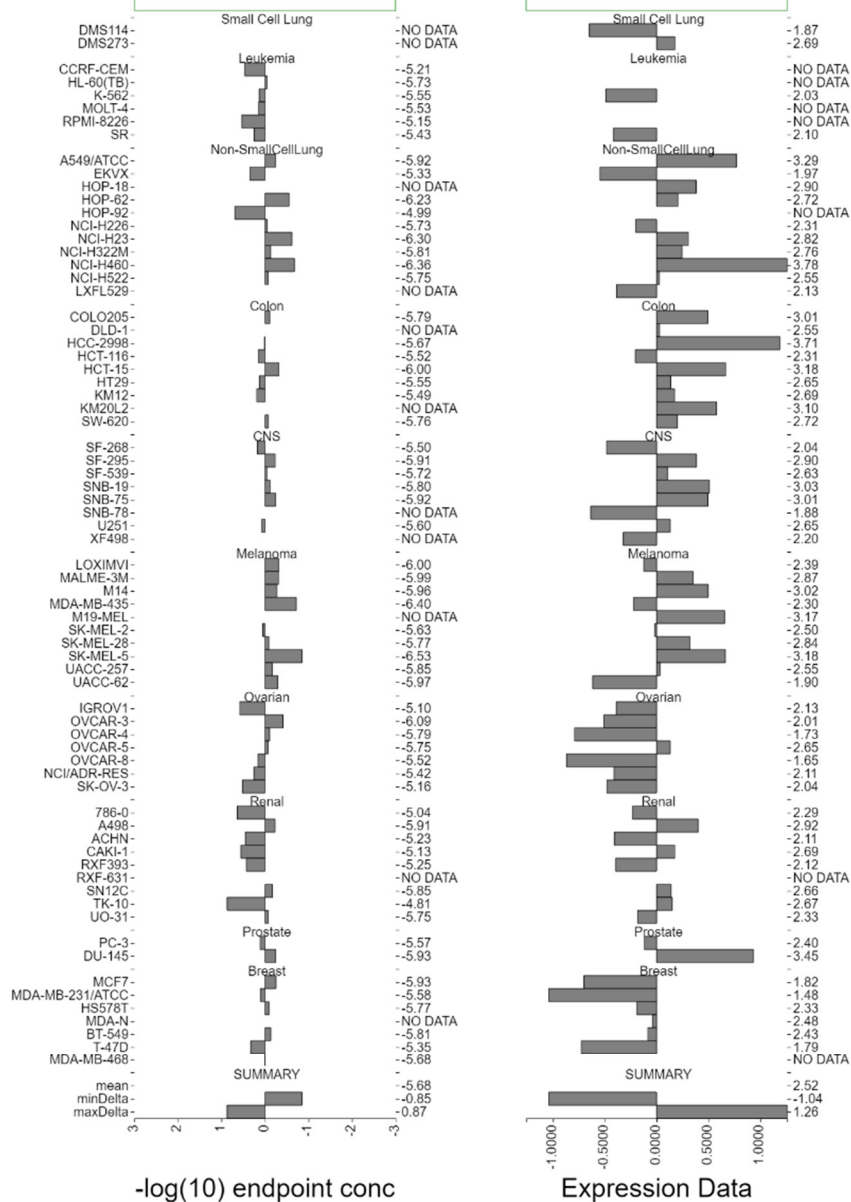

Figure S18

# COMPARE Analysis of DPIQ (NSC753790) to 10a (NSC798710)

---SEED---

NSC:753790 Endpoint:GI50 ExpId:AVGDATA logHiConc:-4.0  
Id: 373263 Count Experiments: 2

---TARGET---

NSC:798710 Endpoint:GI50 ExpId:AVGDATA logHiConc:-4.0  
Id: 72893 Count Experiments: 1

Correlation: 0.75

JobId: 3400101552620000377

S753790  
-4M GI50 2d AVGDATA

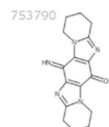

mean/min/max/count  
-5.24 / -6.63 / -4.16 / 60

S798710  
-4M GI50 2d AVGDATA

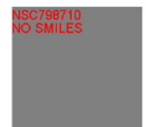

mean/min/max/count  
-6.23 / -7.01 / -5.59 / 58

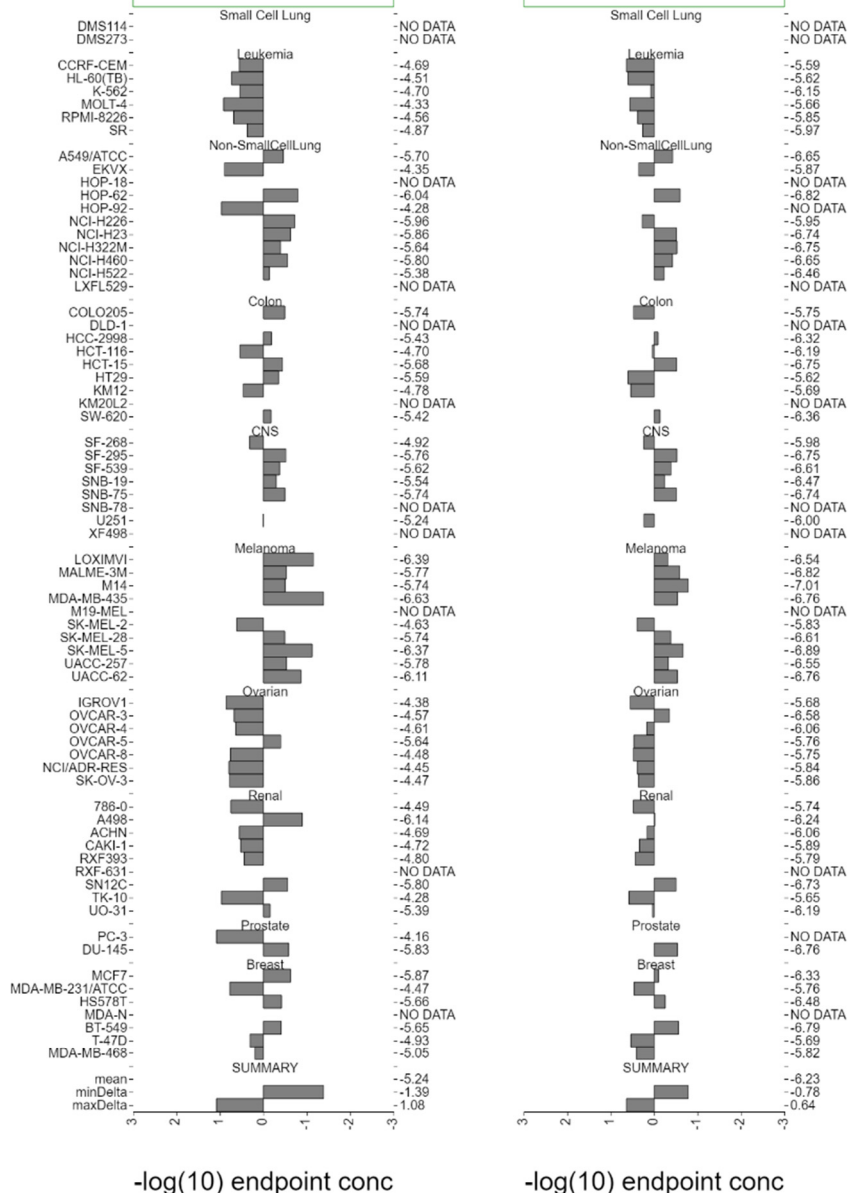

Figure S19

# COMPARE Analysis of 10a (NSC798710) to NQO1

---SEED---

NSC:S798710 Endpoint:GI50 ExpId:AVGDATA logHiConc:-4.0  
Id: 72893 Count Experiments:1

---TARGET---

MoltId:MT22 Genecard:NQO1 TargetSet:MOLTID\_MT\_SERIES

Correlation:0.48

JobId: 7109766531662089207

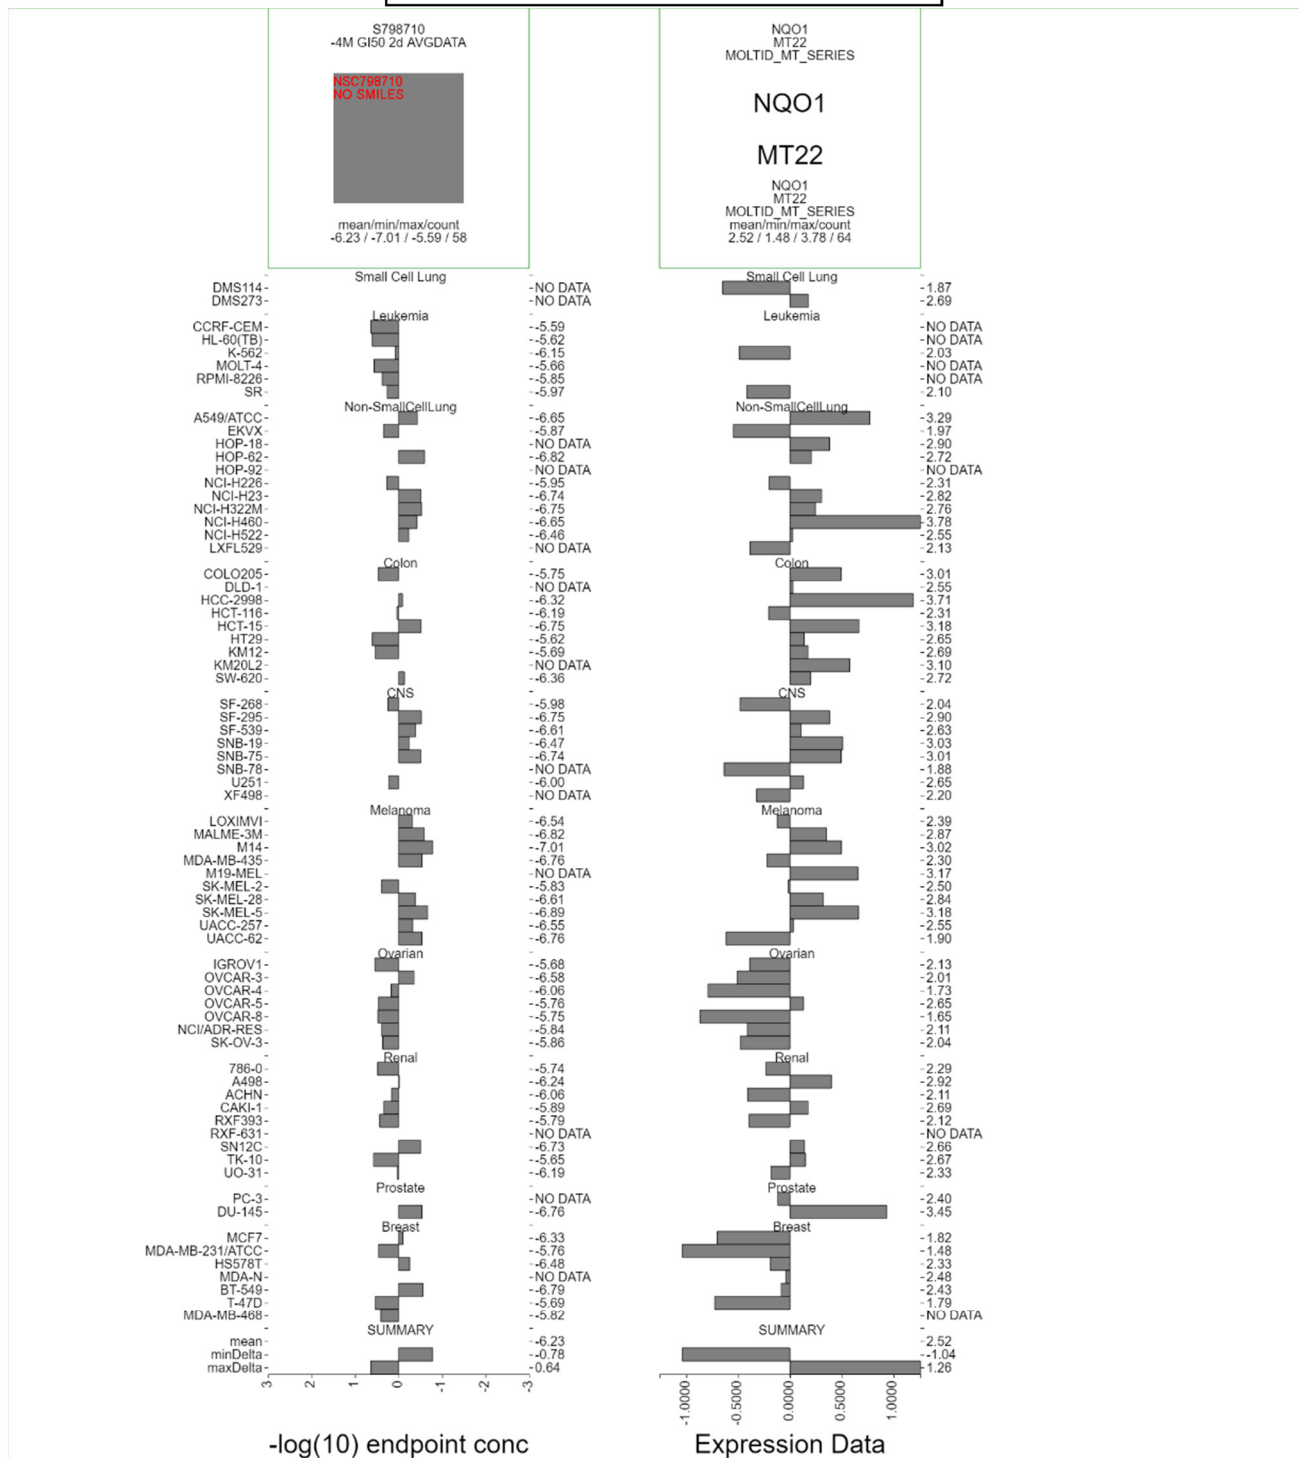

Figure S20

# COMPARE Analysis of DPIQ (NSC753790) to 10b (NSC798709)

---SEED---

NSC:753790 Endpoint:GI50 ExpId:AVGDATA logHiConc:-4.0  
Id: 373263 Count Experiments: 2

---TARGET---

NSC:798709 Endpoint:GI50 ExpId:AVGDATA logHiConc:-4.0  
Id: 193914 Count Experiments: 1

Correlation: 0.72

JobId: 3502385323016355770

S753790  
-4M GI50 2d AVGDATA

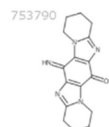

mean/min/max/count  
-5.24 / -6.63 / -4.16 / 60

S798709  
-4M GI50 2d AVGDATA

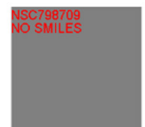

mean/min/max/count  
-6.24 / -7.01 / -5.51 / 58

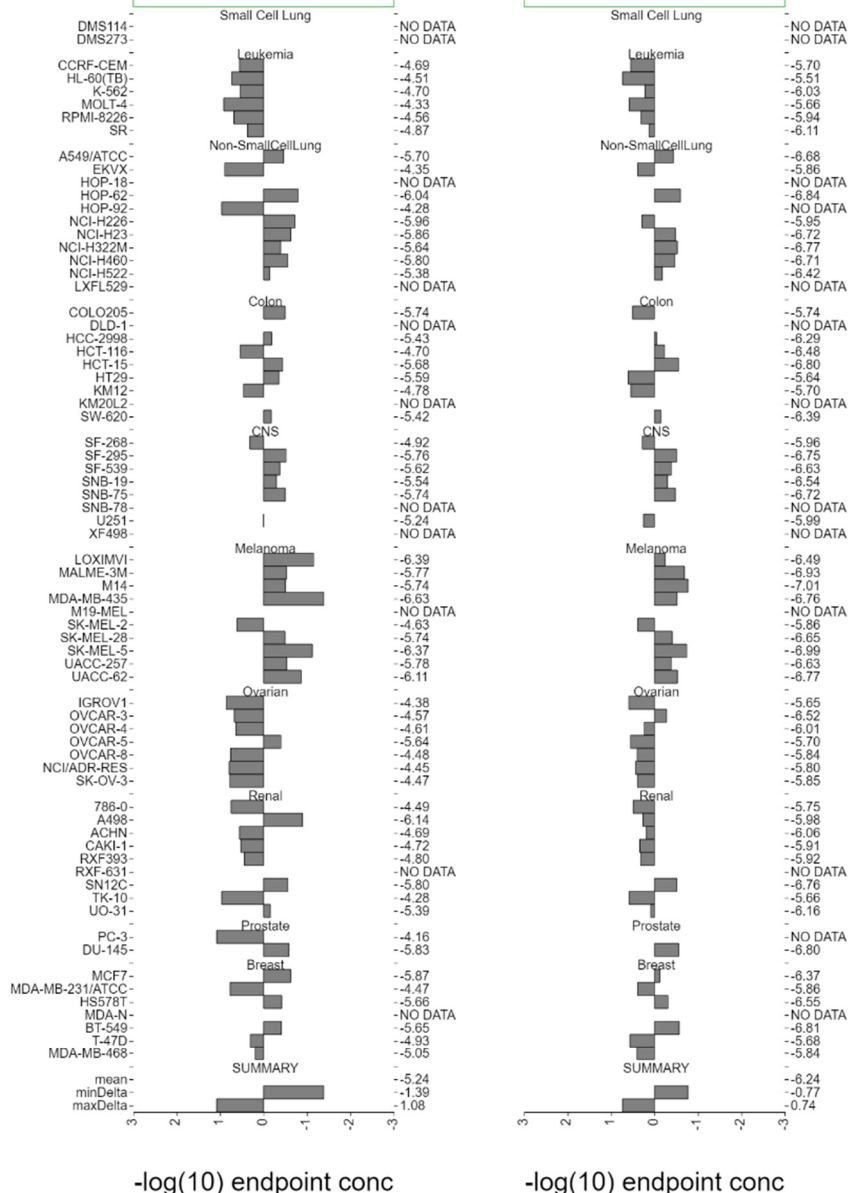

Figure S21

# COMPARE Analysis of 10b (NSC798709) to NQO1

---SEED---

NSC:798709 Endpoint:GI50 ExpId:AVGDATA logHiConc:-4.0  
Id: 193914 Count Experiments:1

---TARGET---

MoltId:MT22 Genecard:NQO1 TargetSet:MOLTID\_MT\_SERIES

Correlation:0.47

JobId: 5437088846418911921

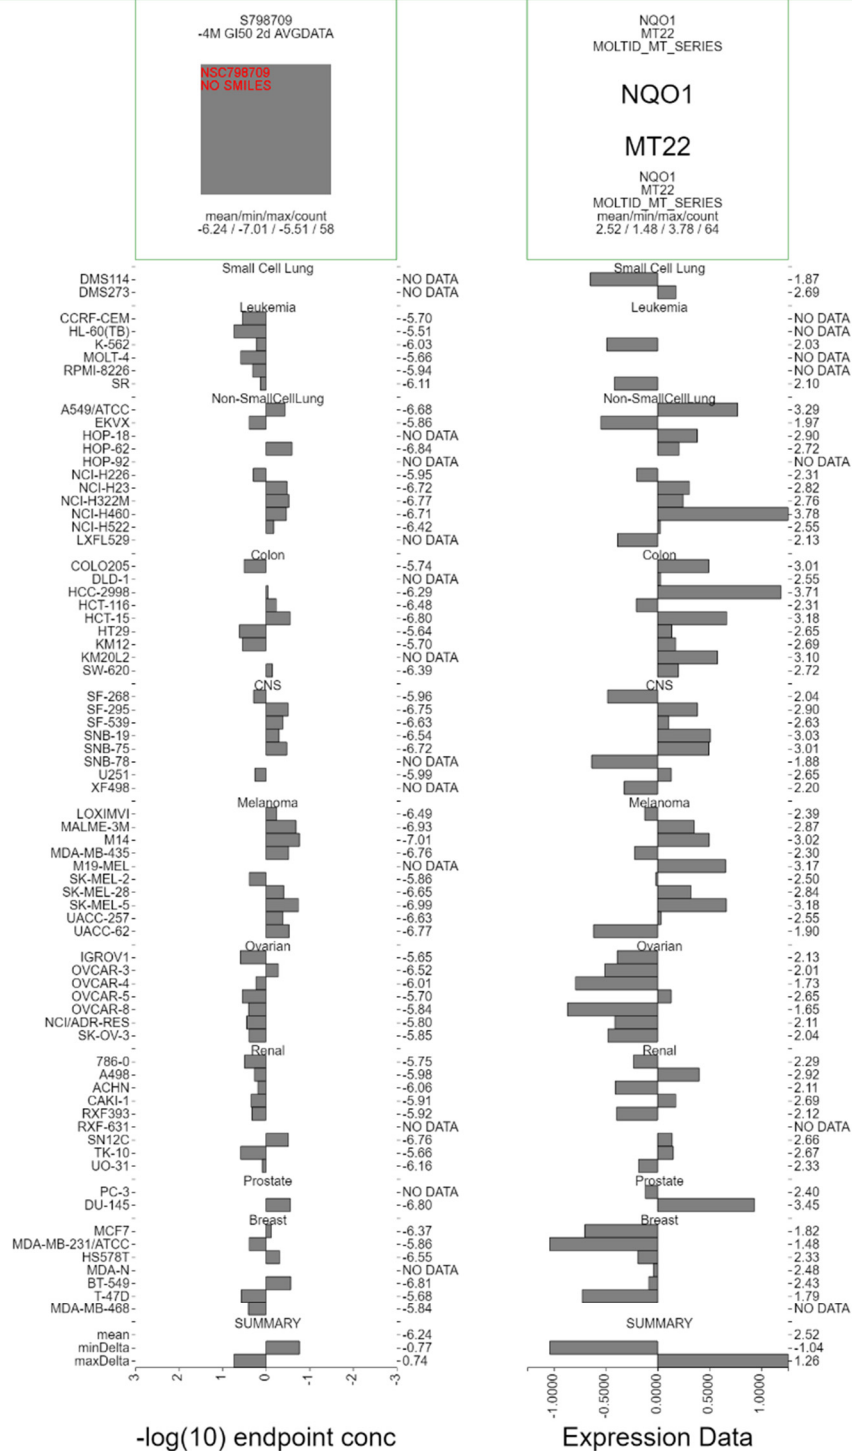

Figure S22

# COMPARE Analysis of DPIQ (NSC753790) to **11b** (NSC750104)

---SEED---

NSC:S753790 Endpoint:GI50 Expld:AVGDATA logHiConc:-4.0  
Id: 373263 Count Experiments:2

---TARGET---

NSC:S750104 Endpoint:GI50 Expld:AVGDATA logHiConc:-4.0  
Id: 192468 Count Experiments:2

Correlation:0.73

JobId: 3236006900684295182

S750104  
-4M GI50 2d AVGDATA

750104

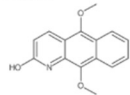

mean/min/max/count  
-5.32 / -6.24 / -4.19 / 60

S753790  
-4M GI50 2d AVGDATA

753790

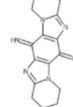

mean/min/max/count  
-5.24 / -6.63 / -4.16 / 60

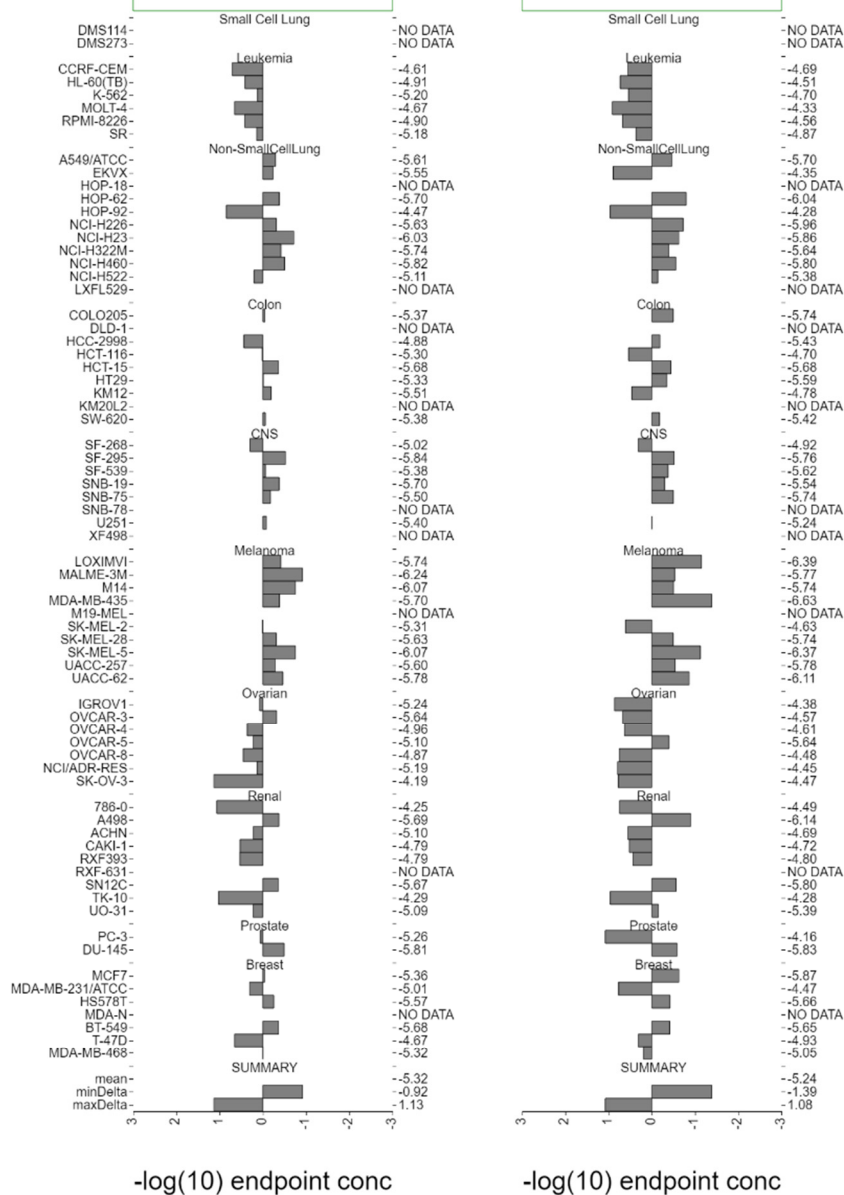

Figure S23



# COMPARE Analysis of 11b (NSC750104) to NQO1

---SEED---

NSC:S750104 Endpoint:GI50 ExpId:AVGDATA logHiConc:-4.0  
Id: 192468 Count Experiments:2

---TARGET---

MoltId:MT22 Genecard:NQO1 TargetSet:MOLTID\_MT\_SERIES

Correlation:0.44

JobId: 6783138607820758427

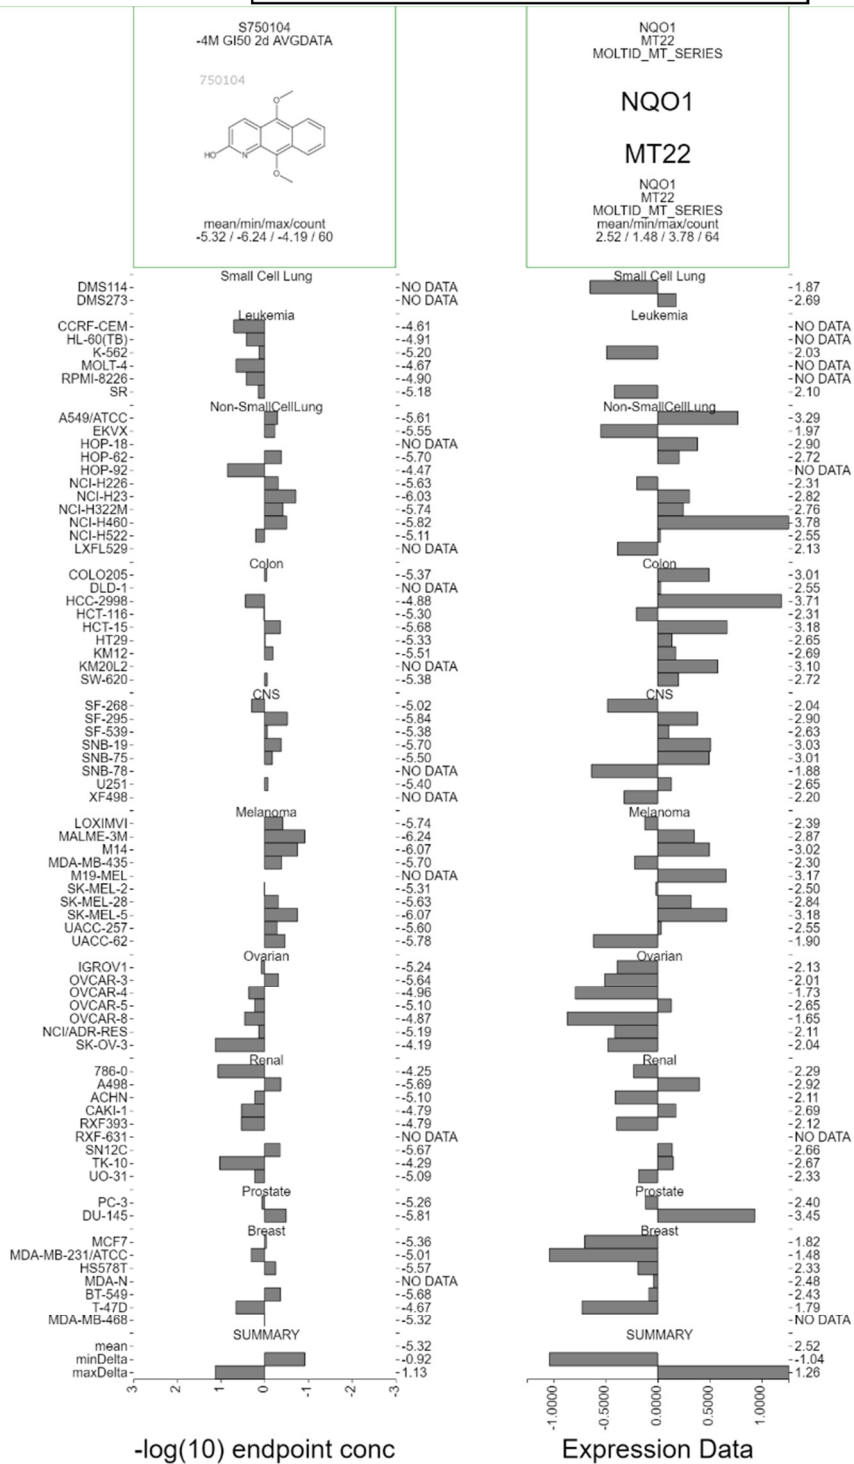

Figure S24



# COMPARE Analysis of DPIQ (NSC753790) to 12 (NSC647943)

---SEED---

NSC:S753790 Endpoint:GI50 Expld:AVGDATA logHiConc:-4.0  
Id: 373263 Count Experiments: 2

---TARGET---

NSC:S647943 Endpoint:GI50 Expld:AVGDATA logHiConc:-4.0  
Id: 3059 Count Experiments: 2

Correlation: 0.72

JobId: 7470274996145913057

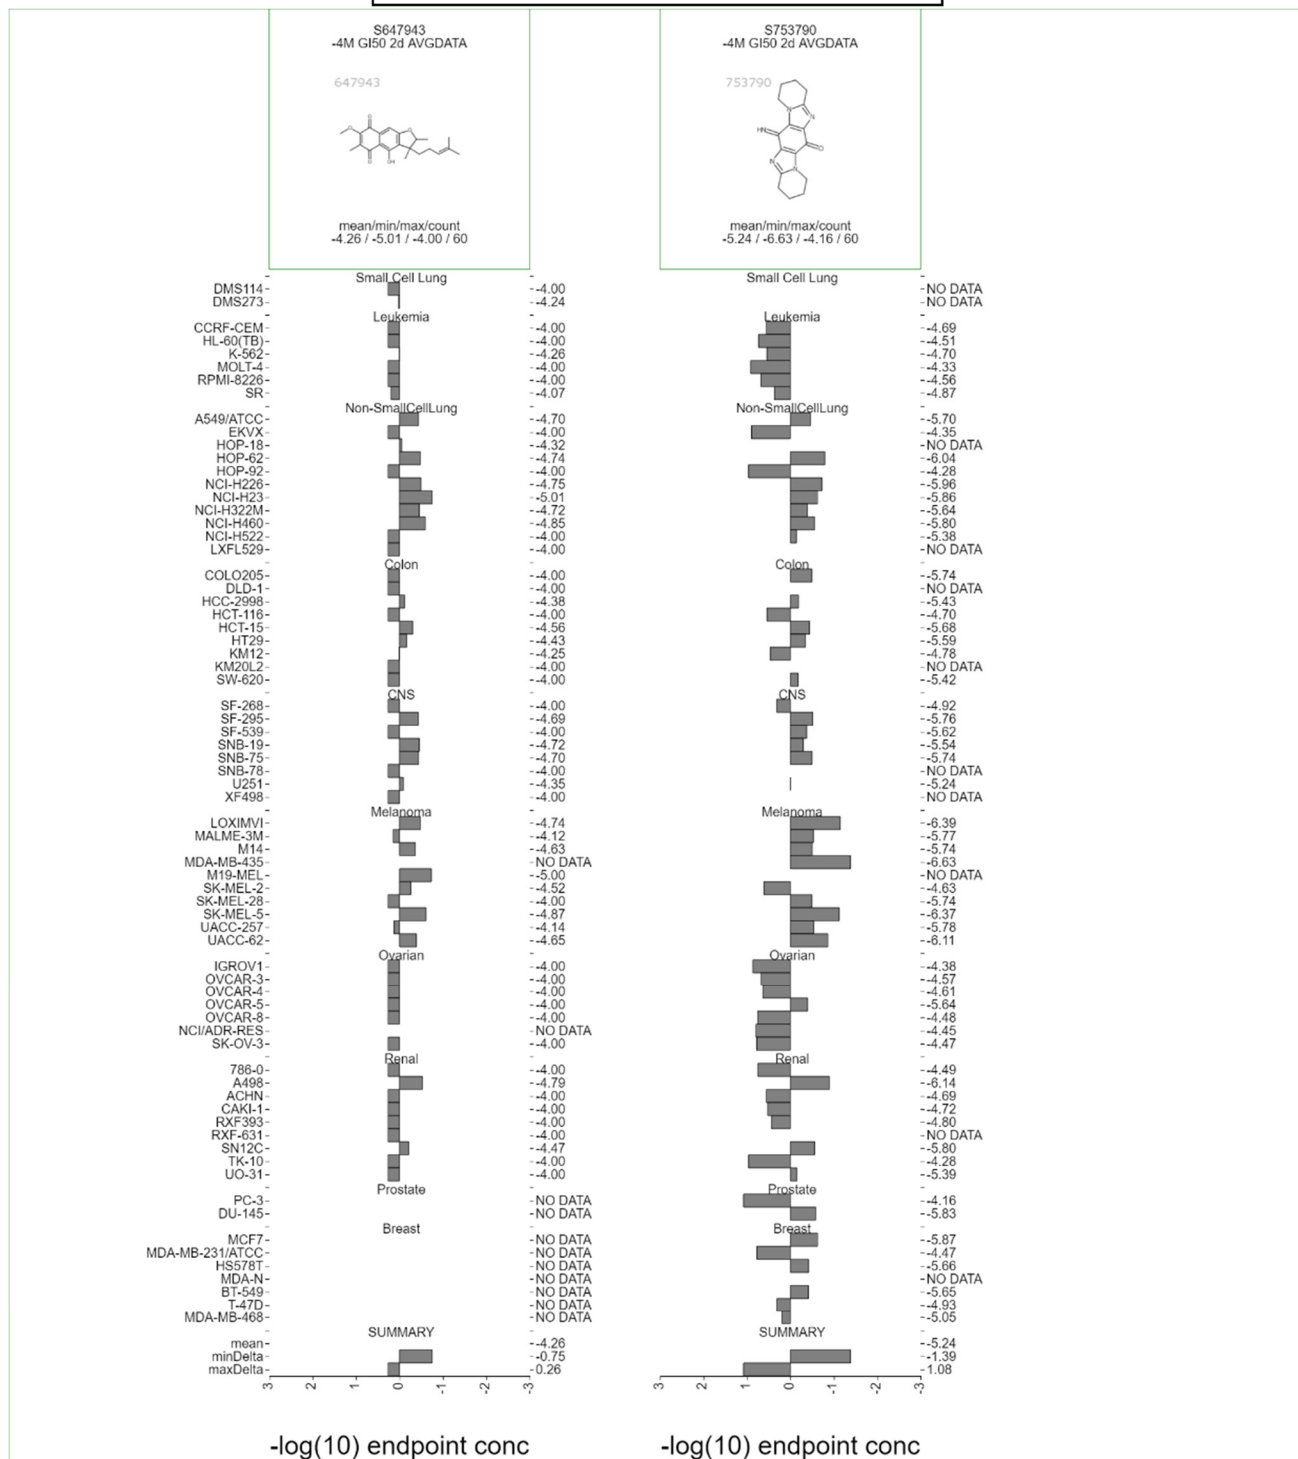

Figure S25

# COMPARE Analysis of 12 (NSC647943) to NQO1

---SEED---

NSC:S647943 Endpoint:GI50 ExpId:AVGDATA logHiConc:-4.0

Id: 3059 Count Experiments: 2

---TARGET---

MoltId:MT22 Genecard:NQO1 TargetSet:MOLTID\_MT\_SERIES

Correlation:0.55

JobId: 1070728578726149116

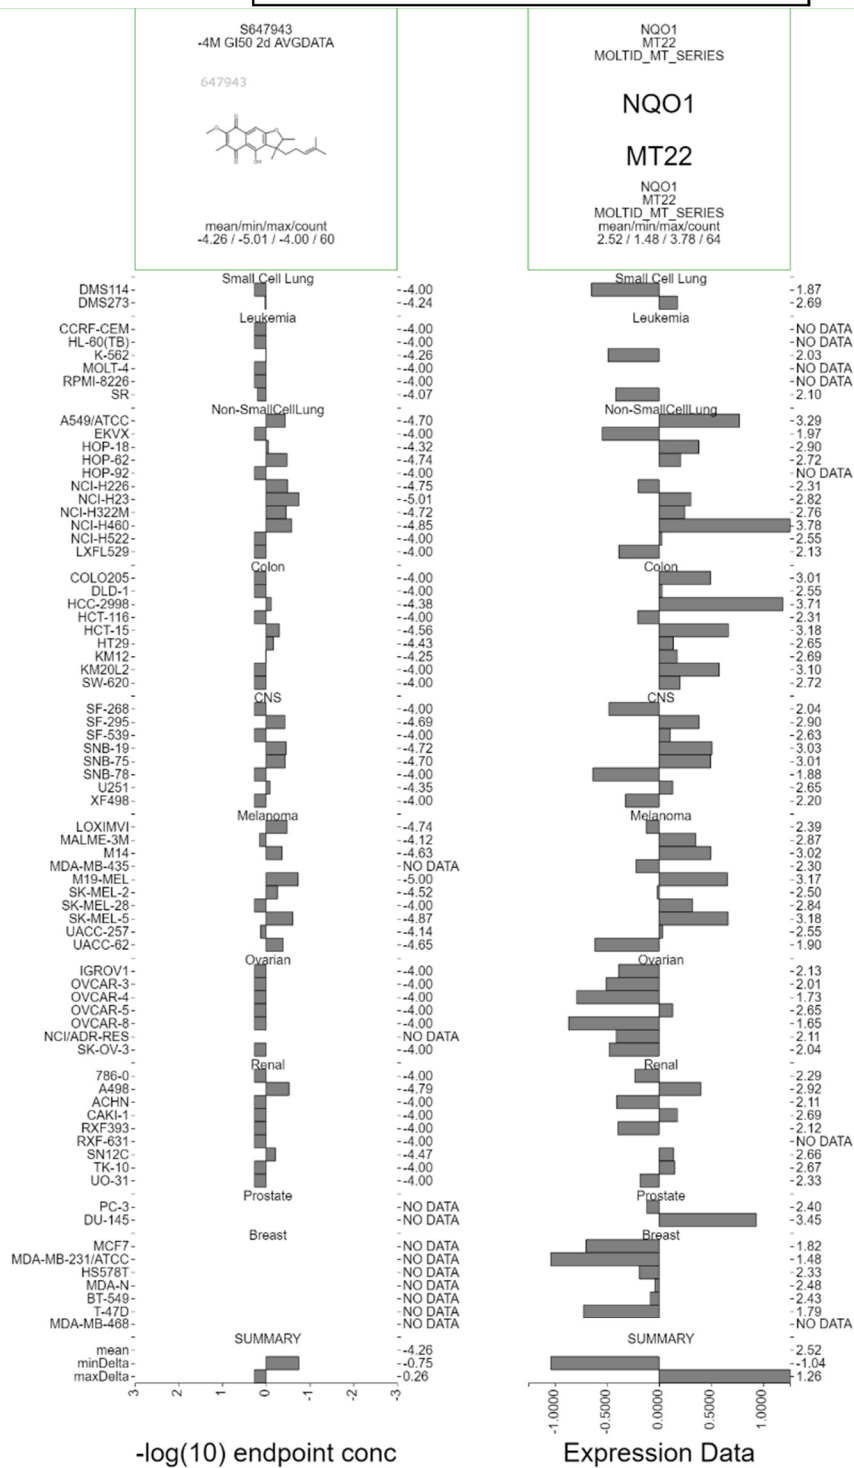

Figure S26

# COMPARE Analysis of 5a (NSC768093) to 13a (NSC787555)

---SEED---

NSC:S768093 Endpoint:GI50 ExpId:AVGDATA logHiConc:-4.0  
Id: 253700 CountExperiments:2

---TARGET---

NSC:S787555 Endpoint:GI50 ExpId:AVGDATA logHiConc:-4.0  
Id: 254082 CountExperiments:3

Correlation:0.85

JobId:3773562751148899517

S768093  
-4M GI50 2d AVGDATA

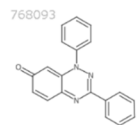

mean/min/max/count  
-5.71 / -6.56 / -4.74 / 59

S787555  
-4M GI50 2d AVGDATA

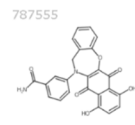

mean/min/max/count  
-6.24 / -7.44 / -5.46 / 60

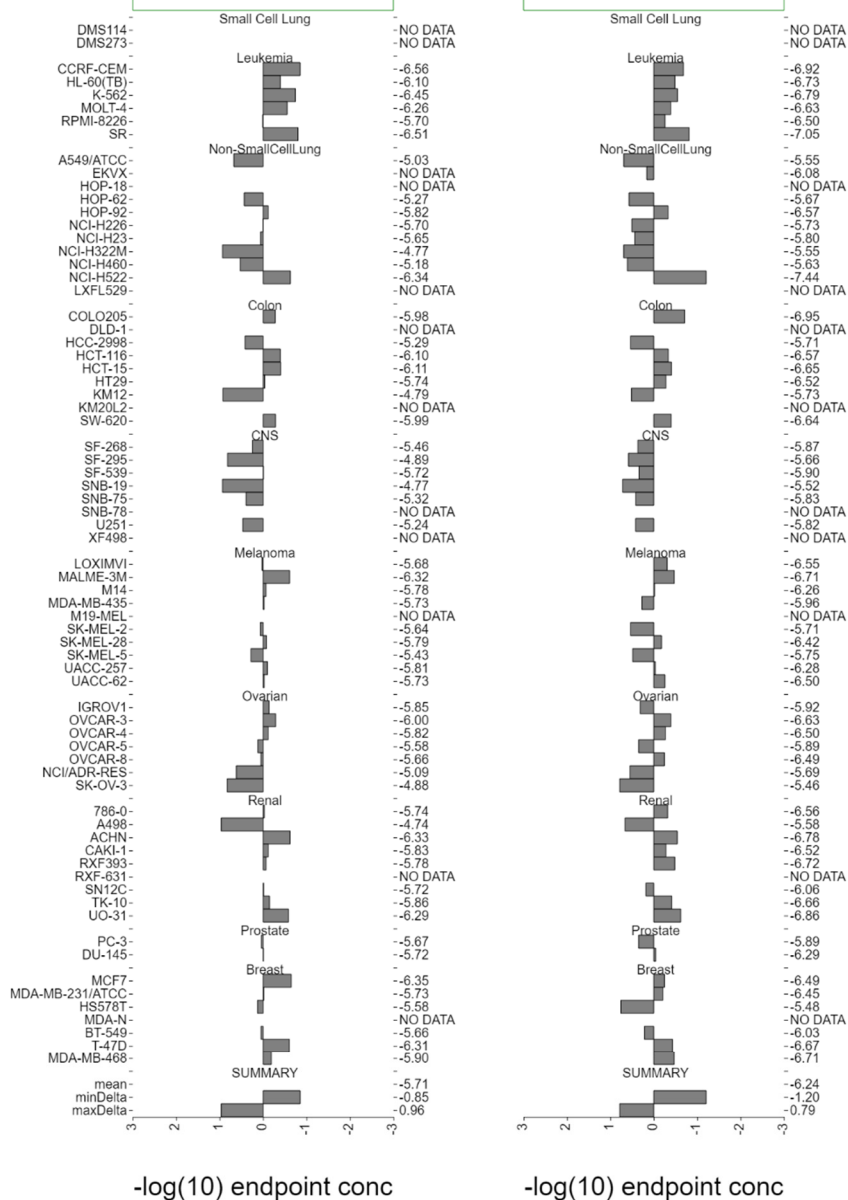

Figure S27

# COMPARE Analysis of 13a (NSC787555) to Pleurotin (NSC401005)

---SEED---

NSC:S787555 Endpoint:GI50 ExpId:AVGDATAlogHiConc:-4.0

Id: 12861 Count Experiments: 3

---TARGET---

NSC:S401005 Endpoint:GI50 ExpId:AVGDATAlogHiConc:-4.0

Id: 243481 Count Experiments: 2

Correlation: 0.89

JobId: 1099128821080064092

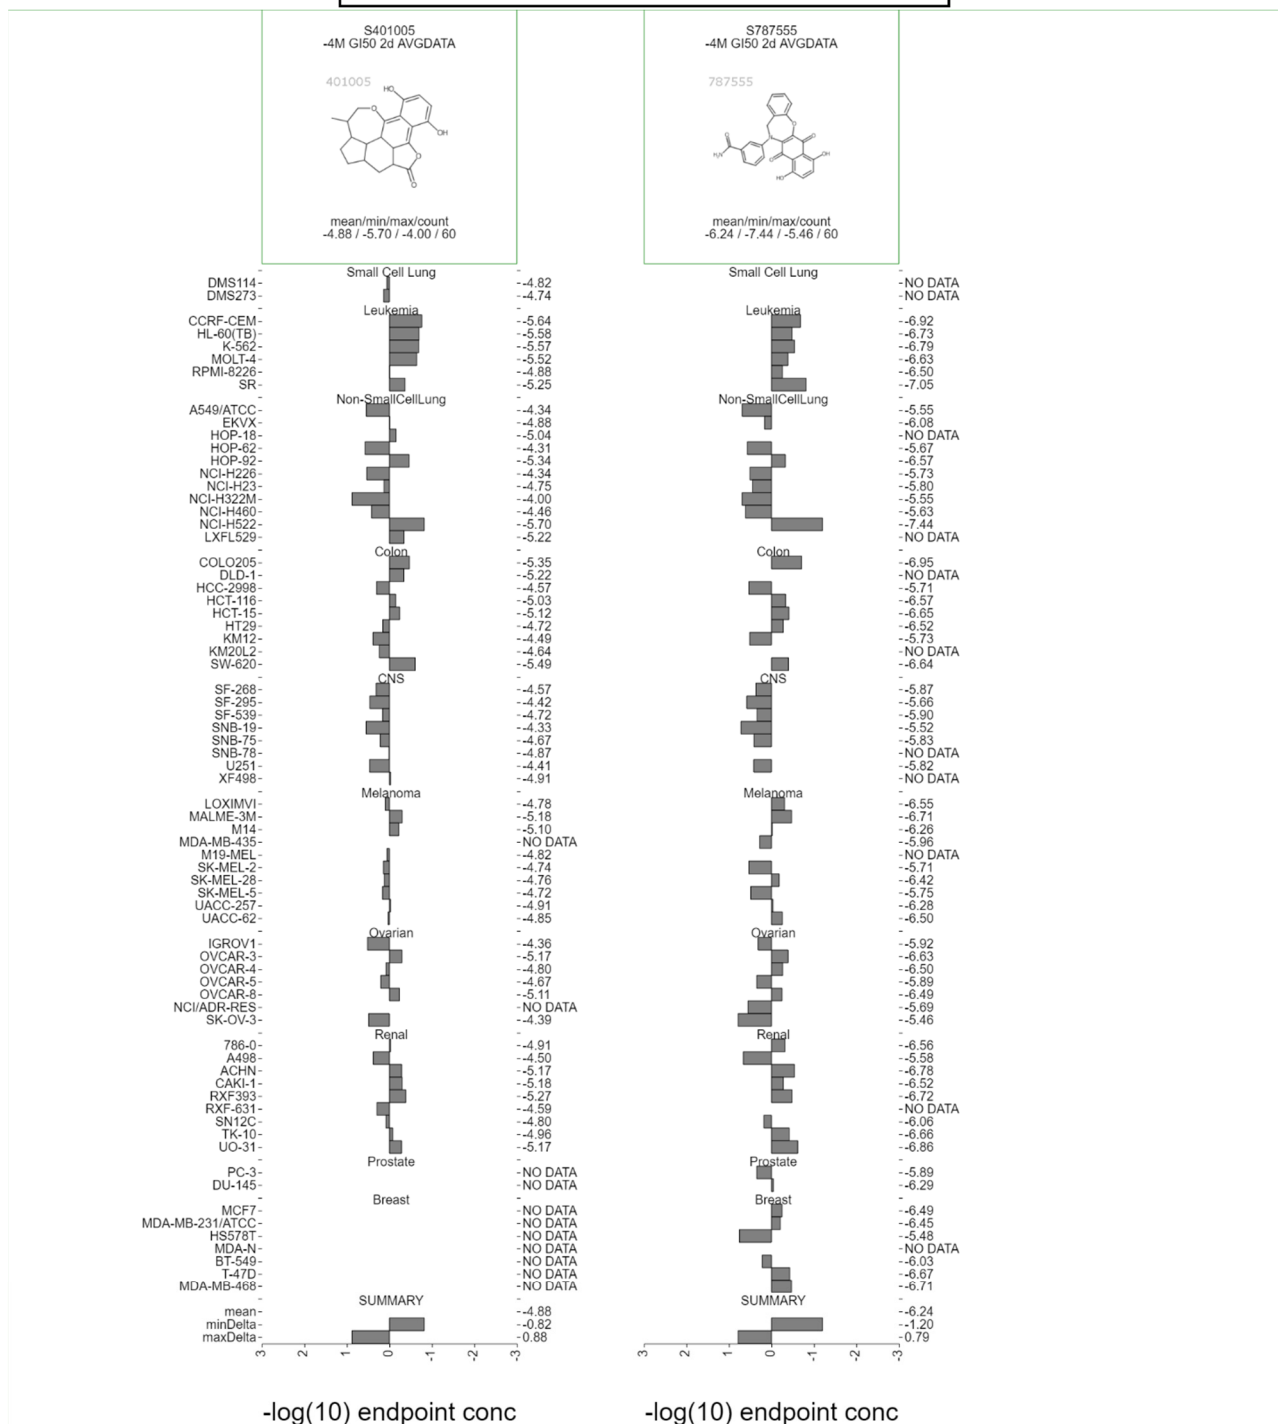

Figure S28



# COMPARE Analysis of **13b** (NSC787553) to Pleurotin (NSC401005)

---SEED---

NSC:S787553 Endpoint:GI50 ExpId:AVGDATAlogHiConc:-4.0  
Id: 133007 Count Experiments:2

---TARGET---

NSC:S401005 Endpoint:GI50 ExpId:AVGDATAlogHiConc:-4.0  
Id: 243481 Count Experiments:2

Correlation:0.86

JobId: 7810175962957311835

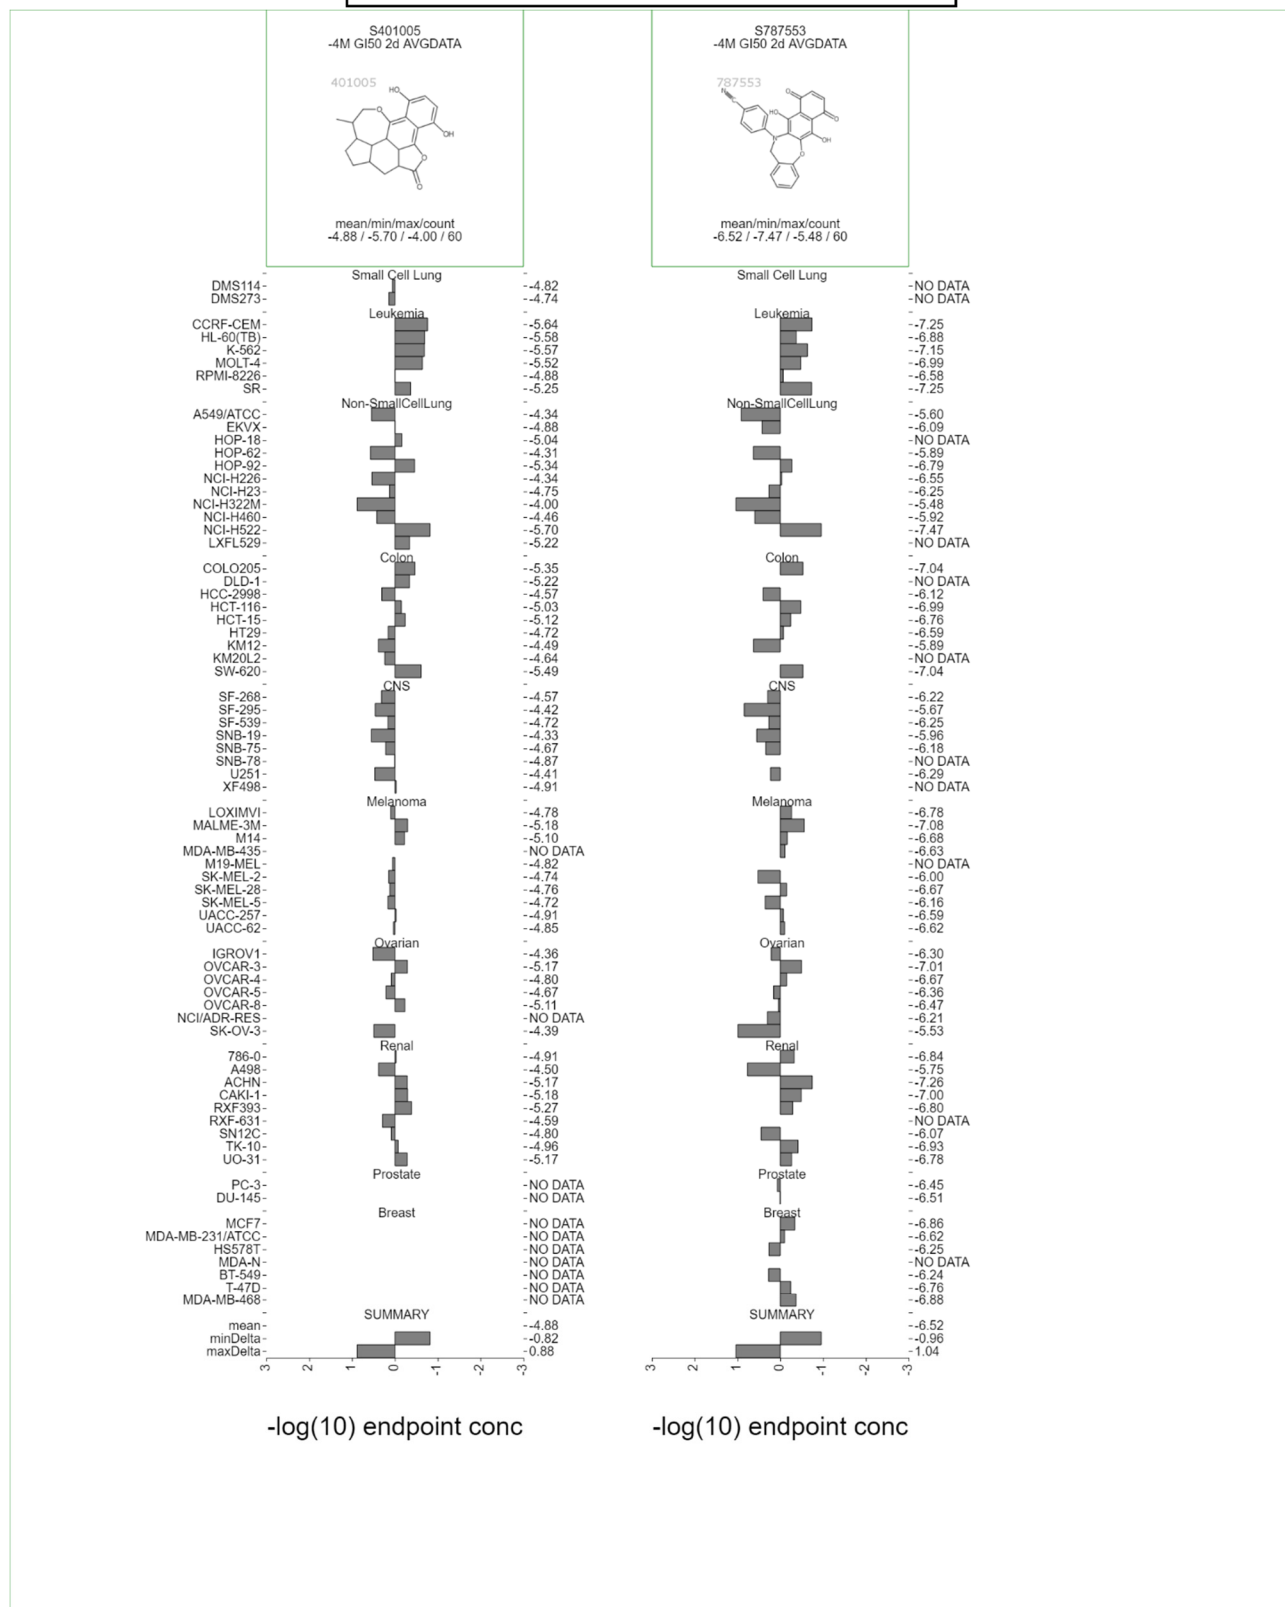

Figure S30

# COMPARE Analysis of 5a (NSC768093) to 13c (NSC787554)

---SEED---

NSC:768093 Endpoint:GI50 ExpId:AVGDATA logHiConc:-4.0  
Id: 253700 Count Experiments:2

---TARGET---

NSC:787554 Endpoint:GI50 ExpId:AVGDATA logHiConc:-4.0  
Id: 72712 Count Experiments:2

Correlation:0.88

JobId: 152861254556724592

S768093  
-4M GI50 2d AVGDATA

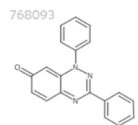

mean/min/max/count  
-5.71 / -6.56 / -4.74 / 59

S787554  
-4M GI50 2d AVGDATA

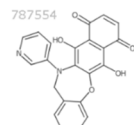

mean/min/max/count  
-6.43 / -7.36 / -5.45 / 60

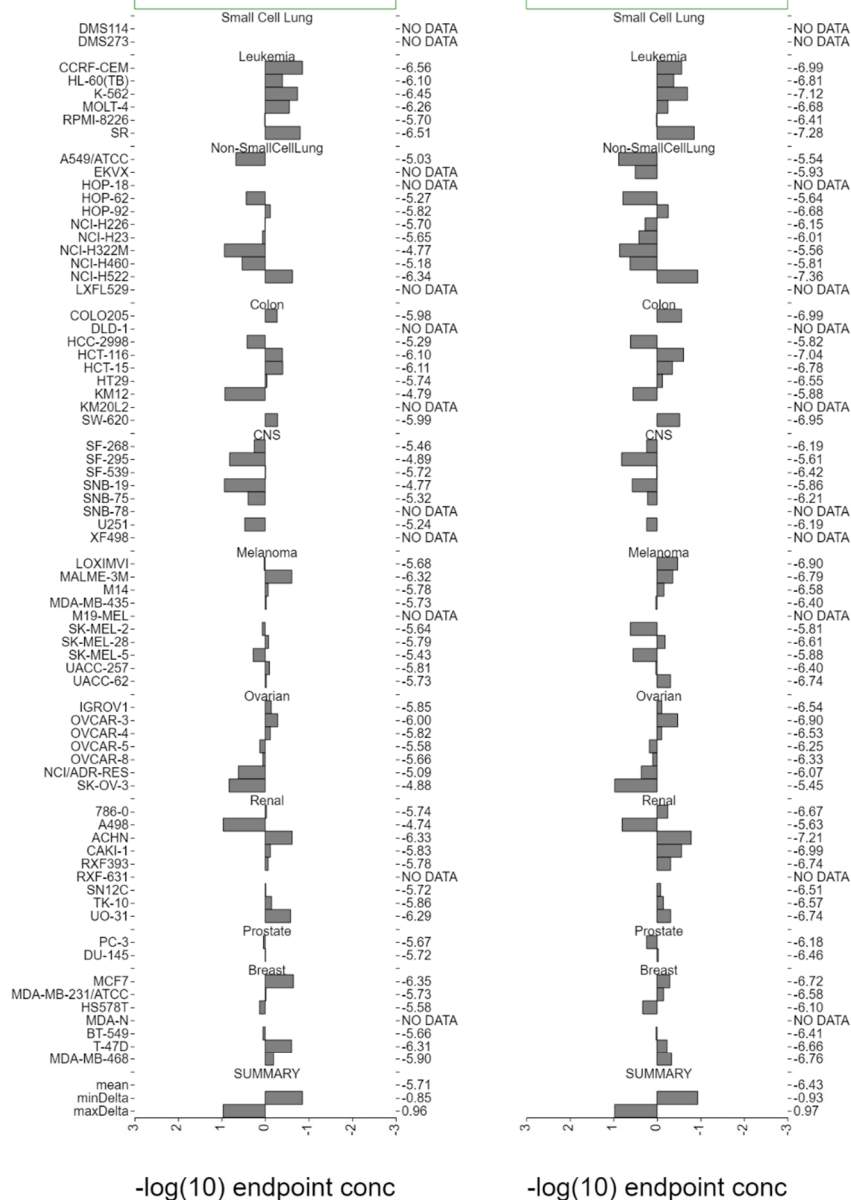

Figure S31

# COMPARE Analysis of 13c (NSC787554) to Pleurotin (NSC401005)

---SEED---

NSC:S787554 Endpoint:GI50 ExpId:AVGDATAlogHiConc:-4.0

Id: 72712 Count Experiments: 2

---TARGET---

NSC:S401005 Endpoint:GI50 ExpId:AVGDATAlogHiConc:-4.0

Id: 243481 Count Experiments: 2

Correlation: 0.82

JobId: 2239556794382988653

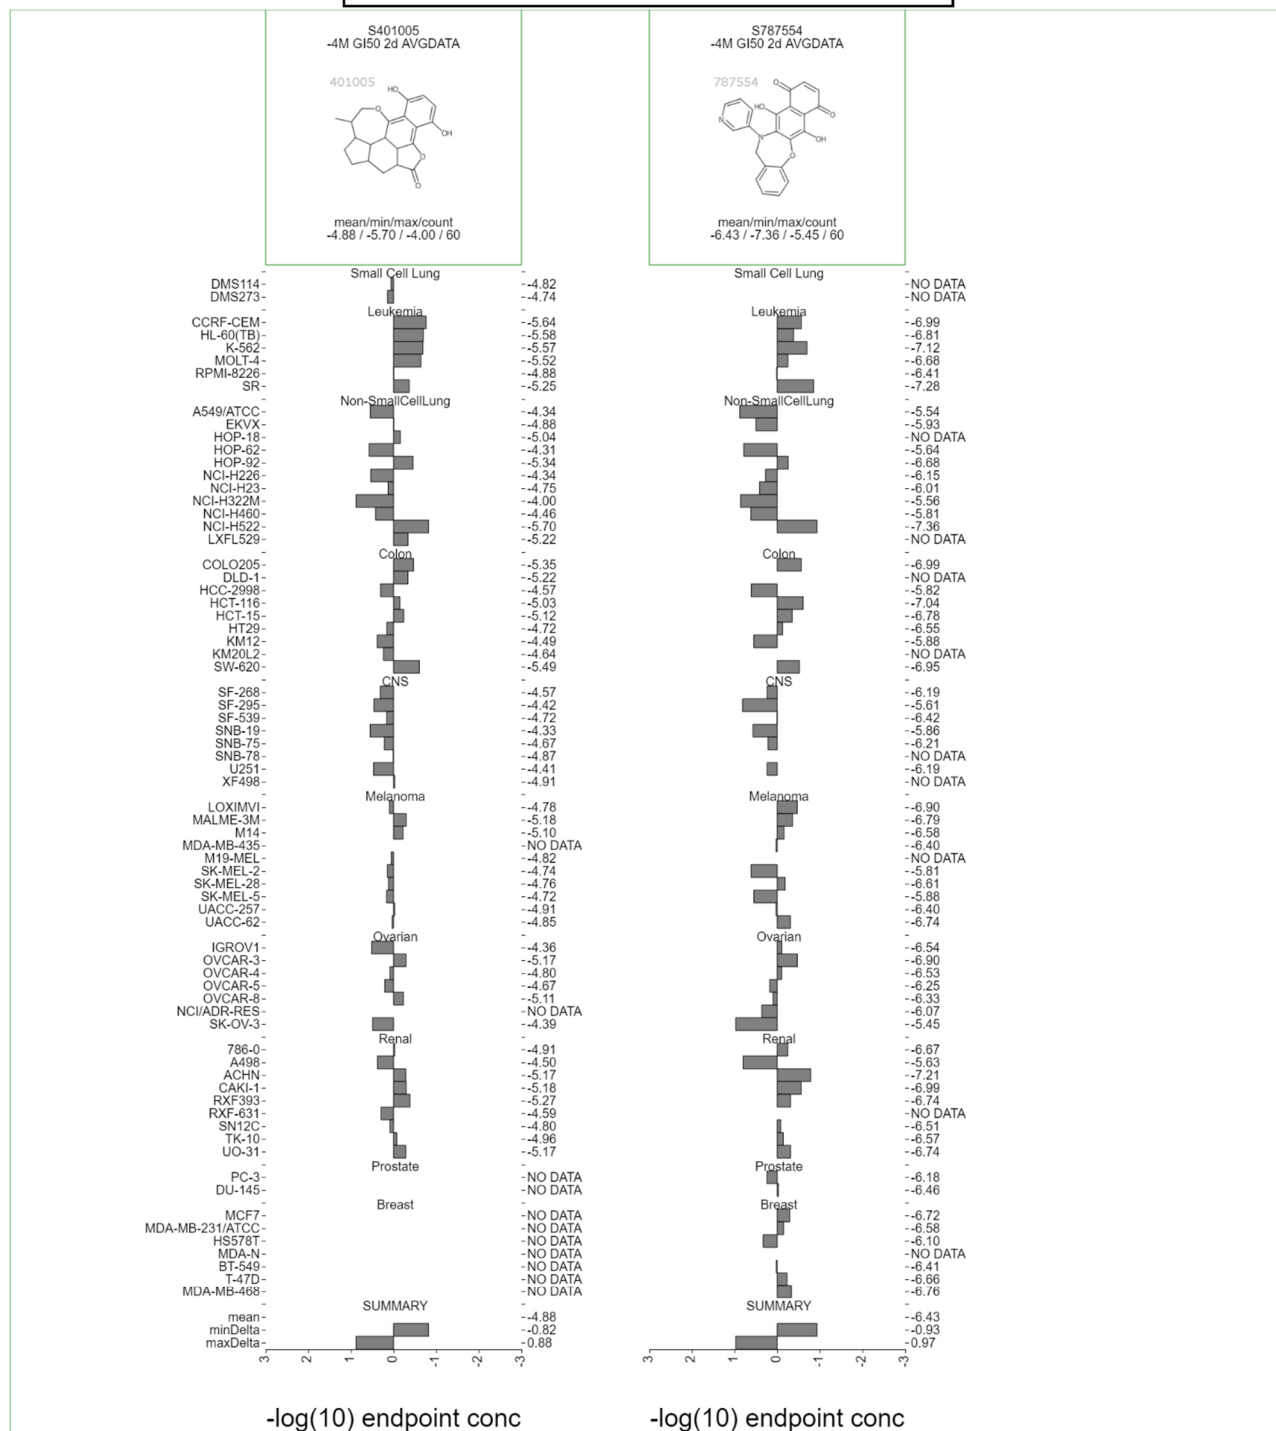

Figure S32



```

--SEED--
NSC:5768093 Endpoint:GI50 Expld:AVGDATAllogHiConc:-4.0
Id: 253700 CountExperiments:2
--TARGET--
NSC:5791347 Endpoint:GI50 Expld:AVGDATAllogHiConc:-4.0
Id: 193820 CountExperiments:2

```

JobId: 979145823477207243

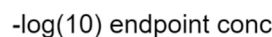

Figure S33

# COMPARE Analysis of 13d (NSC791347) to Pleurotin (NSC401005)

---SEED---

NSC:S791347 Endpoint:GI50 ExpId:AVGDATAlogHiConc:-4.0  
Id: 193820 Count Experiments:2

---TARGET---

NSC:S401005 Endpoint:GI50 ExpId:AVGDATAlogHiConc:-4.0  
Id: 243481 Count Experiments:2

Correlation:0.81

JobId: 802301456905305864

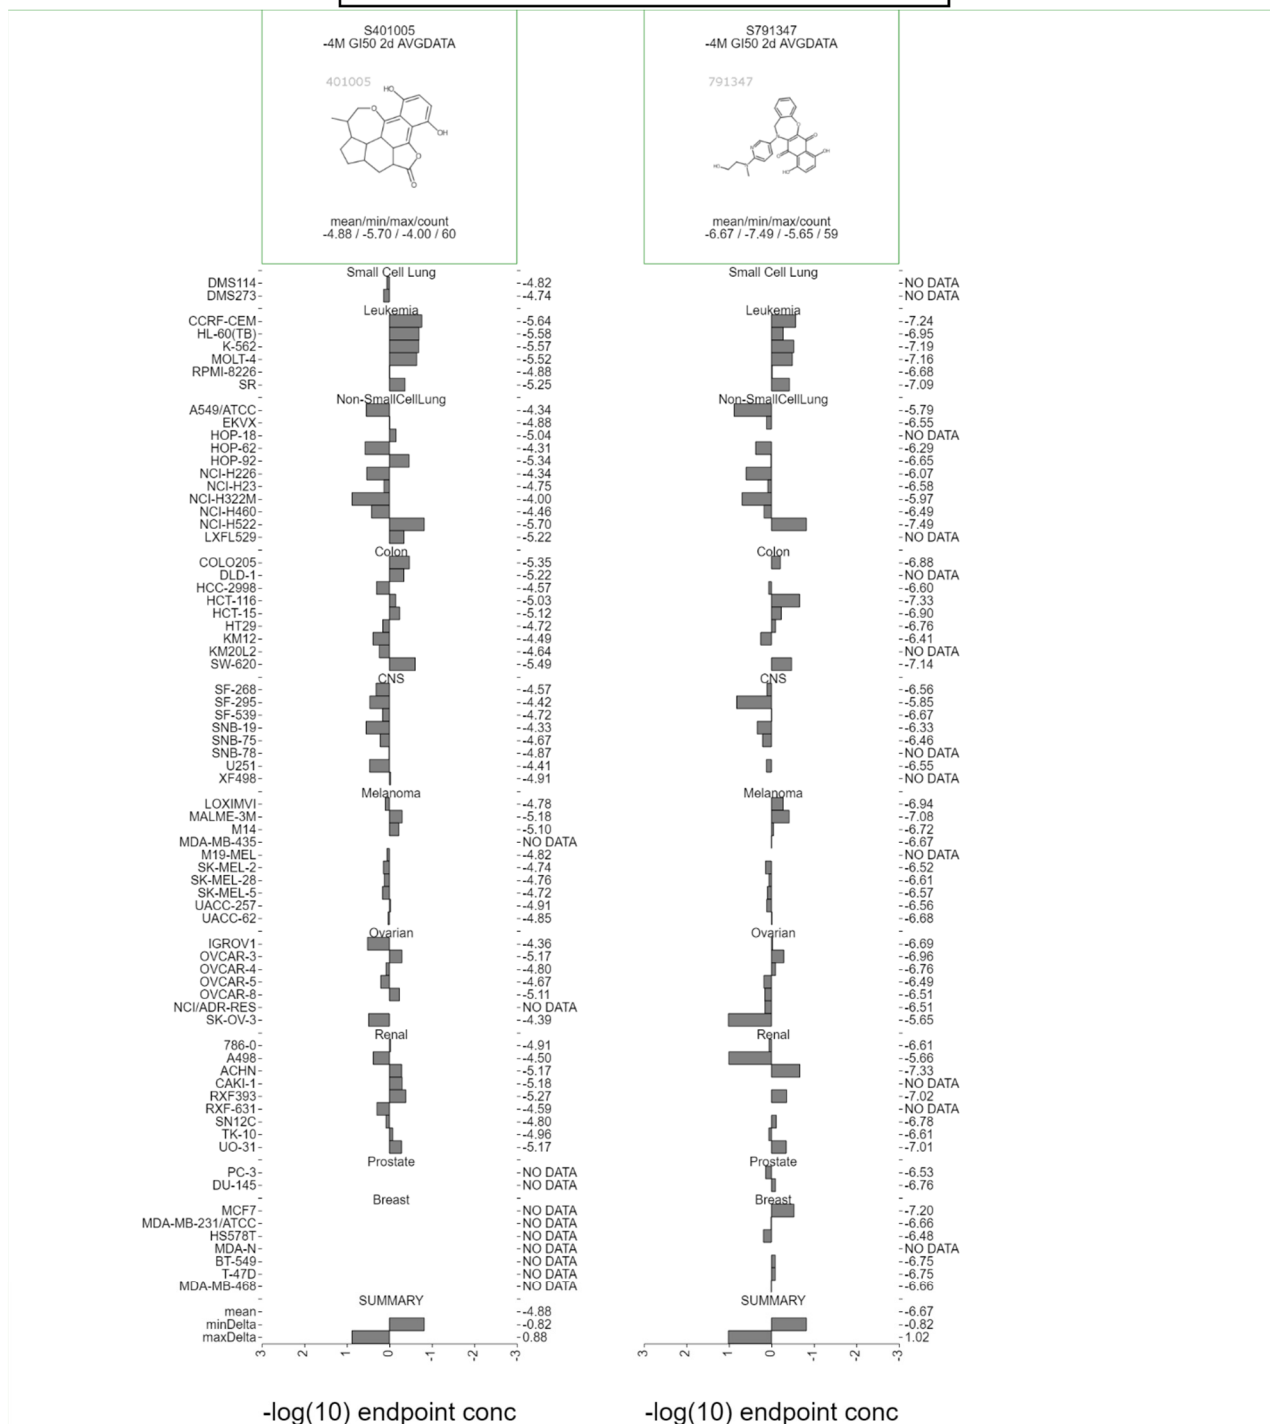

Figure S34

# COMPARE Analysis of 5a (NSC768093) to 14a (NSC92937)

---SEED---

NSC:5768093 Endpoint:GI50 ExpId:AVGDATA logHiConc:-4.0  
Id: 253700 Count Experiments:2

---TARGET---

NSC:592937 Endpoint:GI50 ExpId:AVGDATA logHiConc:-4.0  
Id: 62826 Count Experiments:4

Correlation:0.78

JobId: 6305036997033980351

S92937  
-4M GI50 2d AVGDATA

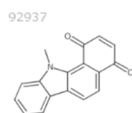

mean/min/max/count  
-5.17 / -6.16 / -4.34 / 70

S768093  
-4M GI50 2d AVGDATA

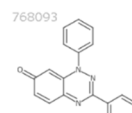

mean/min/max/count  
-5.71 / -6.56 / -4.74 / 59

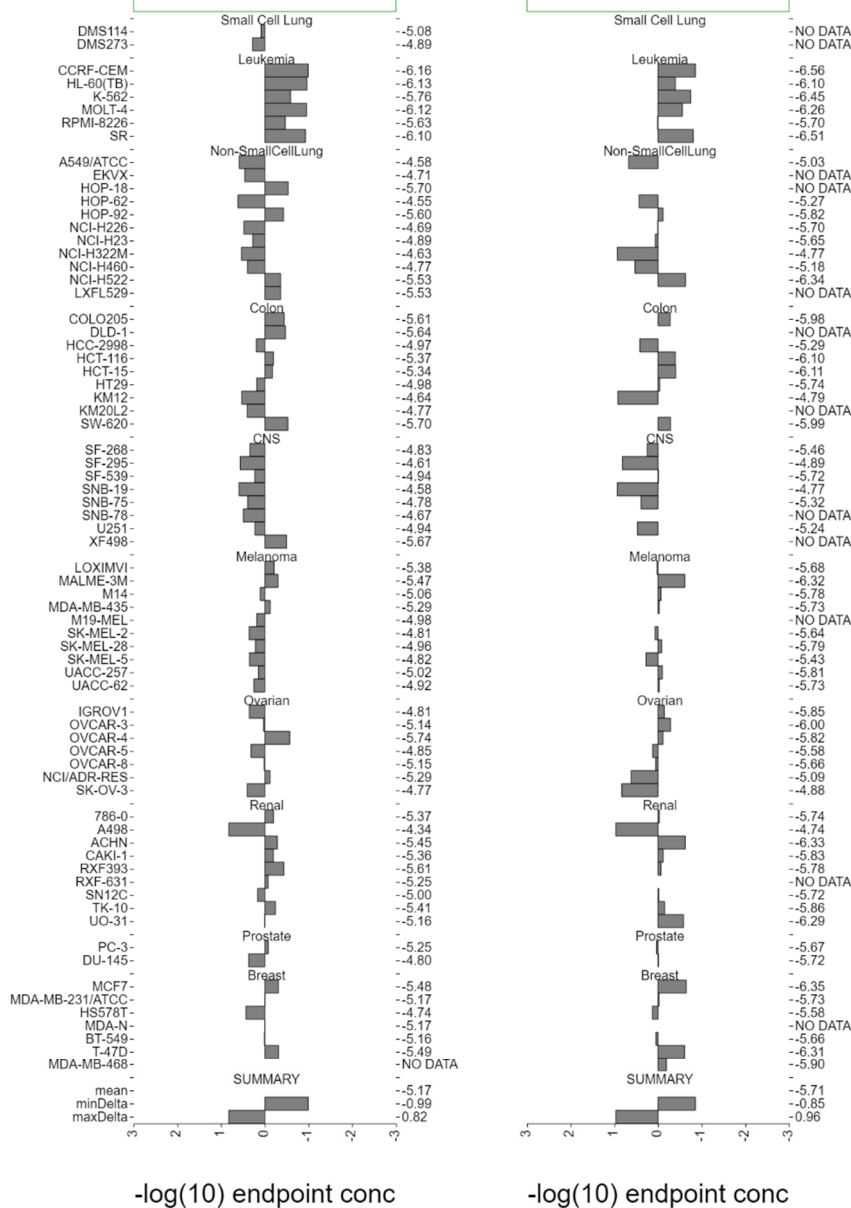

Figure S35

# COMPARE Analysis of 14a (NSC92937) to Pleurotin (NSC401005)

---SEED---

NSC:S92937 Endpoint:GI50 ExpId:AVGDATA logHiConc:-4.0

Id: 62826 Count Experiments: 4

---TARGET---

NSC:S401005 Endpoint:GI50 ExpId:AVGDATA logHiConc:-4.0

Id: 243481 Count Experiments: 2

Correlation: 0.83

JobId: 2862509136855109658

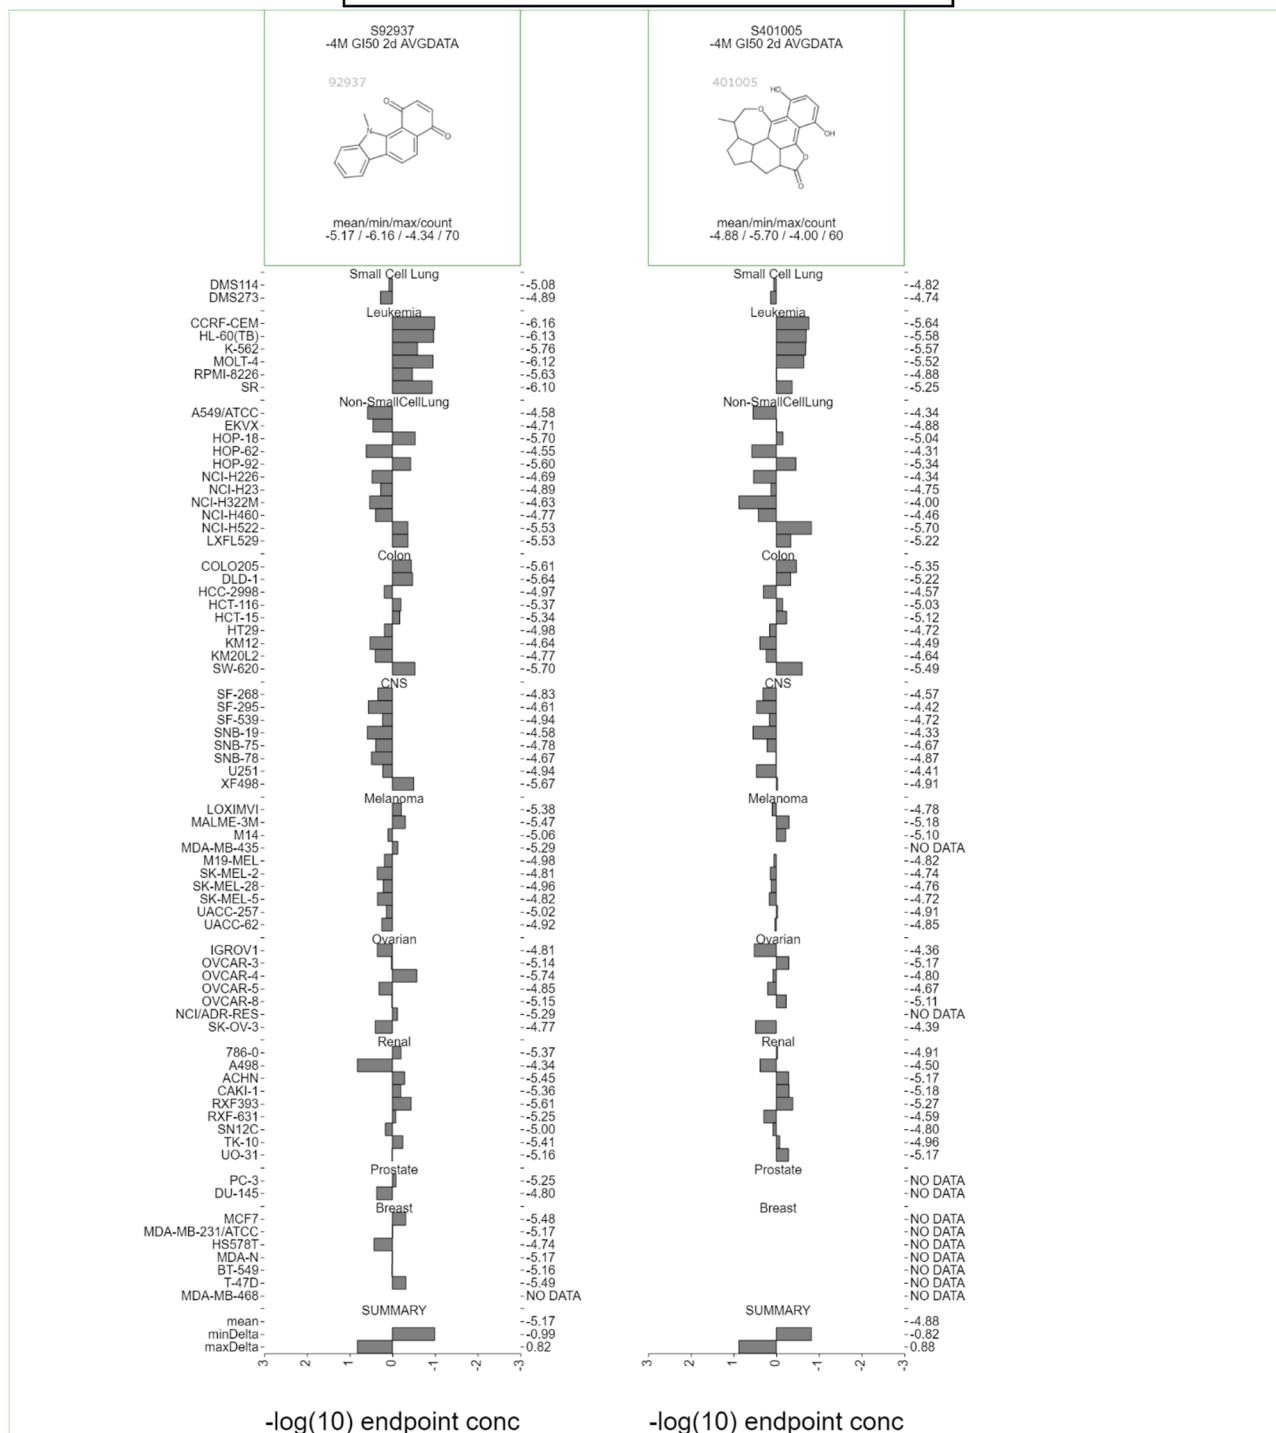

Figure S36

# COMPARE Analysis of 5a (NSC768093) to 14b (NSC668844)

---SEED---

NSC:5768093 Endpoint:GI50 ExpId:AVGDATA logHiConc:-4.0  
Id: 253700 Count Experiments:2

---TARGET---

NSC:5668844 Endpoint:GI50 ExpId:AVGDATA logHiConc:-4.0  
Id: 426305 Count Experiments:3

Correlation:0.82

JobId: 608925587626226542

S668844  
-4M GI50 2d AVGDATA

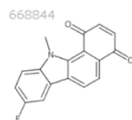

mean/min/max/count  
-4.98 / -6.26 / -4.18 / 60

S768093  
-4M GI50 2d AVGDATA

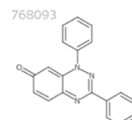

mean/min/max/count  
-5.71 / -6.56 / -4.74 / 59

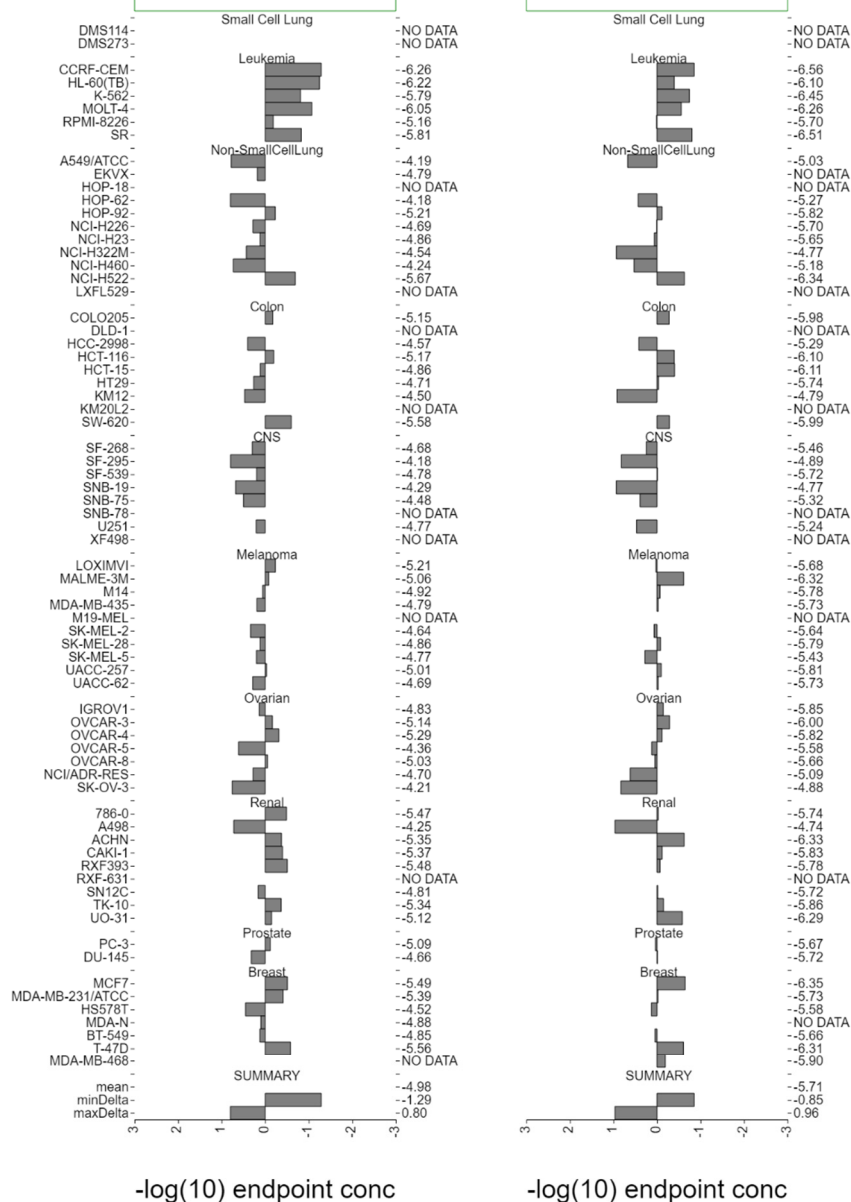

Figure S37

Figure S38

# COMPARE Analysis of 5a (NSC768093) to 14c (NSC661222)

---SEED---

NSC:5768093 Endpoint:GI50 ExpId:AVGDATA logHiConc:-4.0  
Id: 253700 Count Experiments:2

---TARGET---

NSC:5661222 Endpoint:GI50 ExpId:AVGDATA logHiConc:-4.0  
Id: 425825 Count Experiments:2

Correlation:0.79

JobId: 4240006198921766318

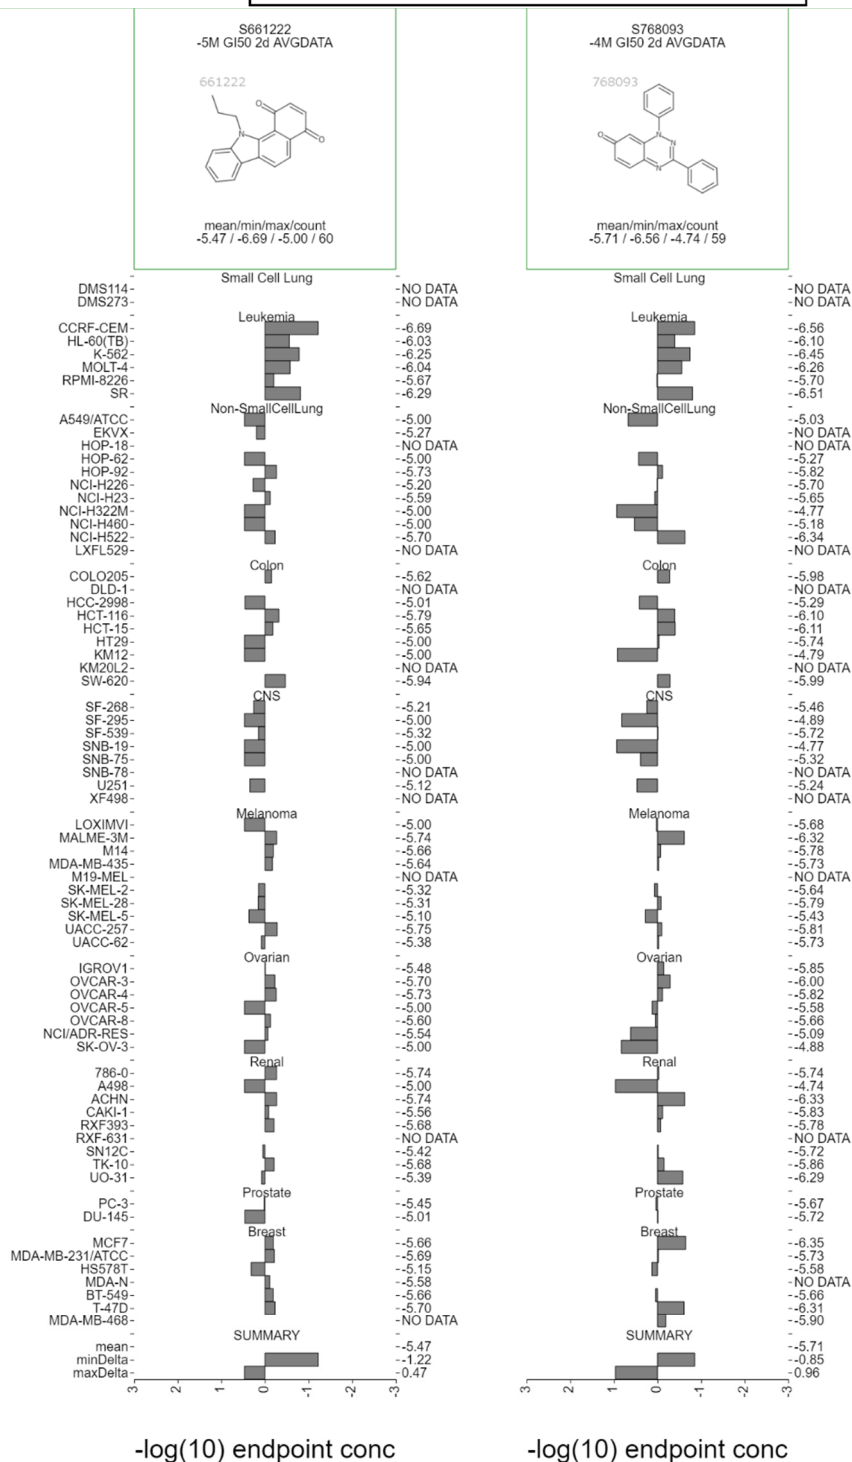

Figure S39

# COMPARE Analysis of 14c (NSC661222) to Pleurotin (NSC401005)

---SEED---

NSC:S661222 Endpoint:GI50 ExpId:AVGDATAlogHiConc:-4.0  
Id: 425825 Count Experiments:2

---TARGET---

NSC:S401005 Endpoint:GI50 ExpId:AVGDATAlogHiConc:-4.0  
Id: 243481 Count Experiments:2

Correlation:0.84

JobId: 2729056243356103181

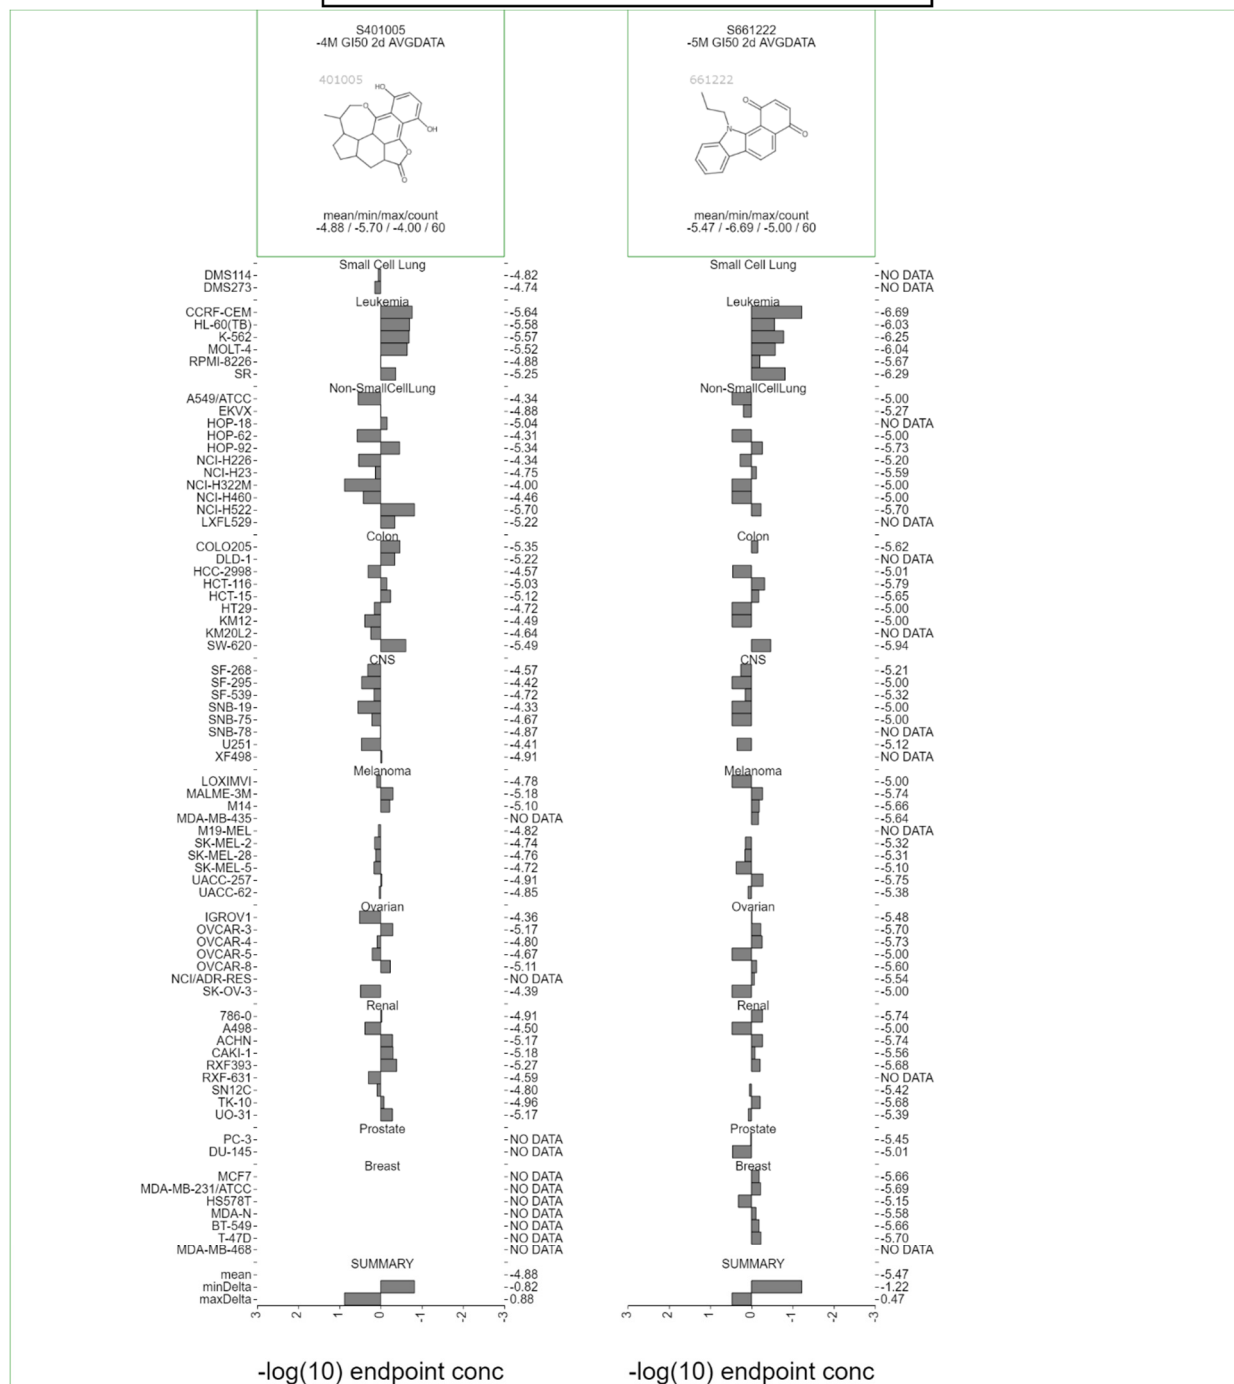

Figure S40



# COMPARE Analysis of 5a (NSC768093) to 14d (NSC645330)

---SEED---

NSC:S768093 Endpoint:GI50 ExpId:AVGDATA logHiConc:-4.0  
Id: 253700 Count Experiments: 2

---TARGET---

NSC:S645330 Endpoint:GI50 ExpId:AVGDATA logHiConc:-4.0  
Id: 2668 Count Experiments: 2

Correlation: 0.74

JobId: 6456704583804920861

S645330  
-4M GI50 2d AVGDATA

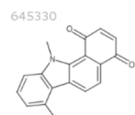

mean/min/max/count  
-5.22 / -6.33 / -4.56 / 59

S768093  
-4M GI50 2d AVGDATA

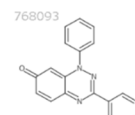

mean/min/max/count  
-5.71 / -6.56 / -4.74 / 59

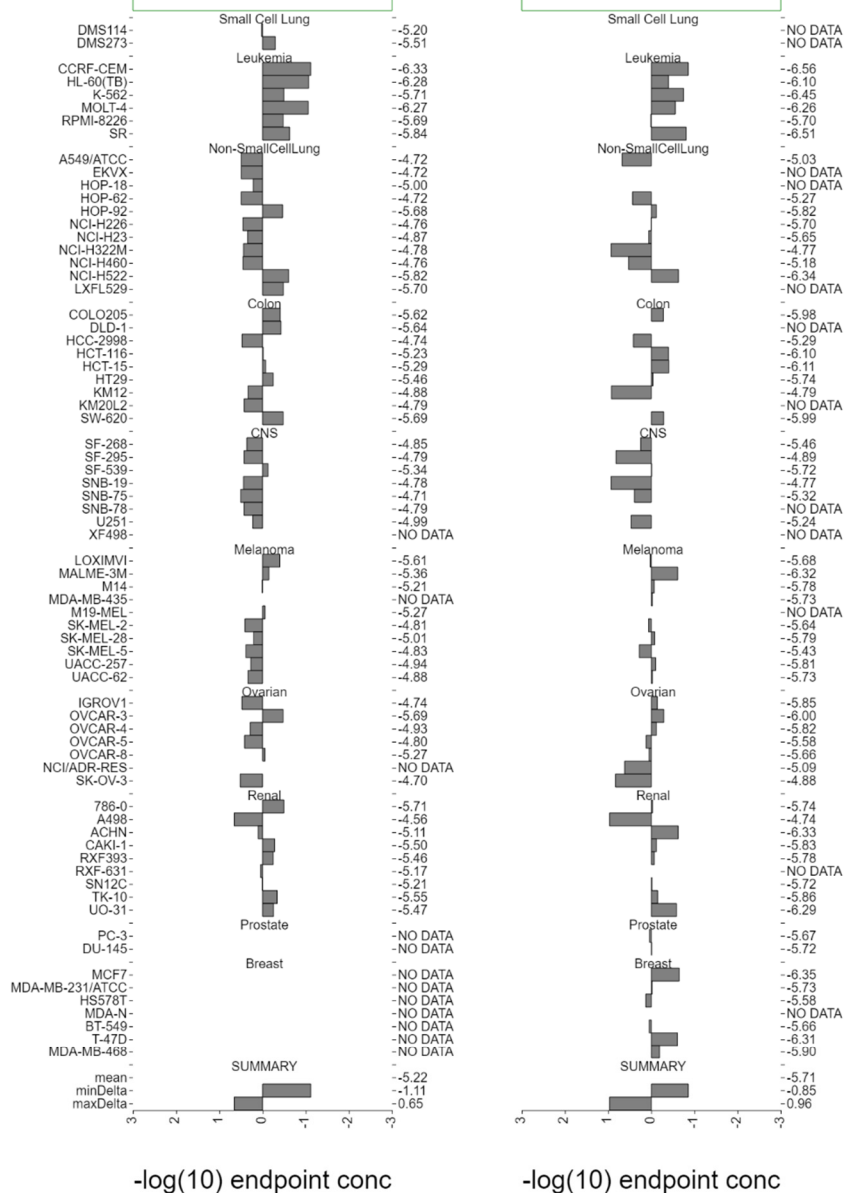

Figure S41

# COMPARE Analysis of 14d (NSC645330) to Pleurotin (NSC401005)

---SEED---

NSC:S645330 Endpoint:GI50 ExpId:AVGDATAlogHiConc:-4.0

Id: 2668 Count Experiments: 2

---TARGET---

NSC:S401005 Endpoint:GI50 ExpId:AVGDATAlogHiConc:-4.0

Id: 243481 Count Experiments: 2

Correlation: 0.82

JobId: 8924669832522260190

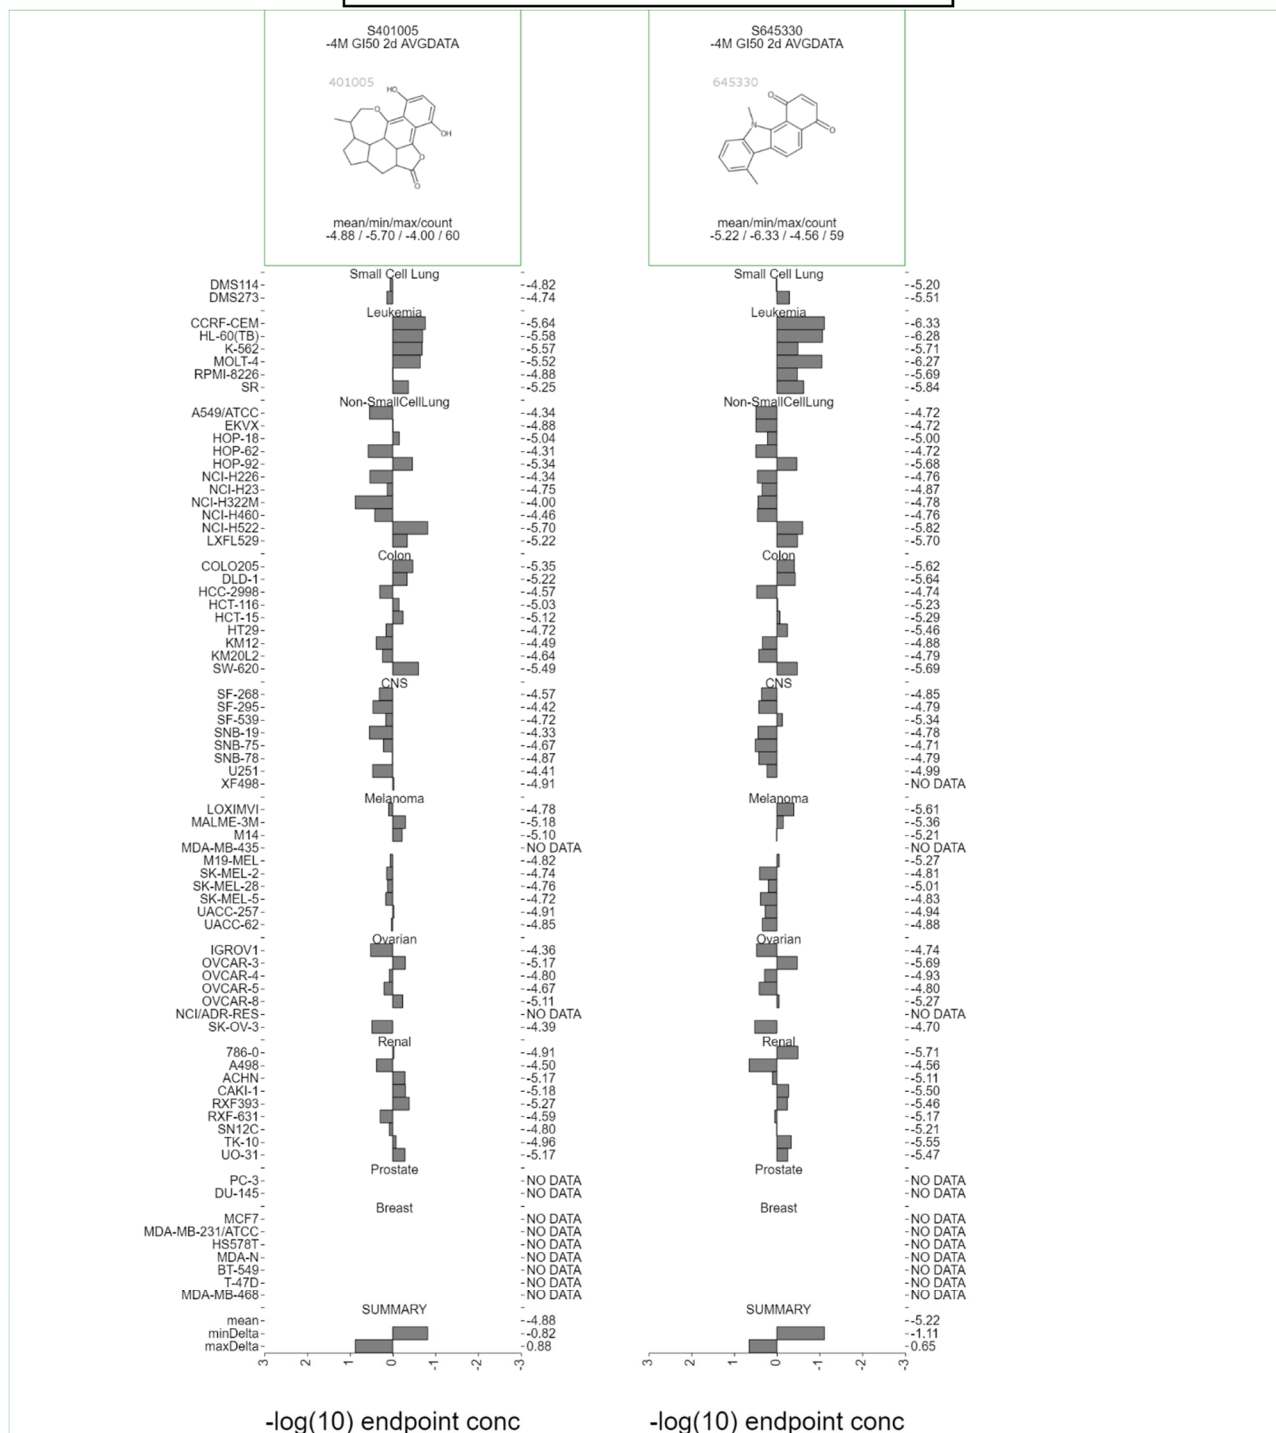

Figure S42

# COMPARE Analysis of 5a (NSC768093) to 14e (NSC661221)

---SEED---

NSC:5768093 Endpoint:GI50 ExpId:AVGDATA logHiConc:-4.0  
Id: 253700 Count Experiments:2

---TARGET---

NSC:5661221 Endpoint:GI50 ExpId:AVGDATA logHiConc:-4.0  
Id: 425824 Count Experiments:2

Correlation:0.78

JobId: 2832546849340558660

S661221  
-5M GI50 2d AVGDATA

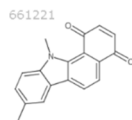

mean/min/max/count  
-5.55 / -6.57 / -5.00 / 60

S768093  
-4M GI50 2d AVGDATA

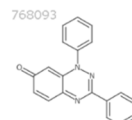

mean/min/max/count  
-5.71 / -6.56 / -4.74 / 59

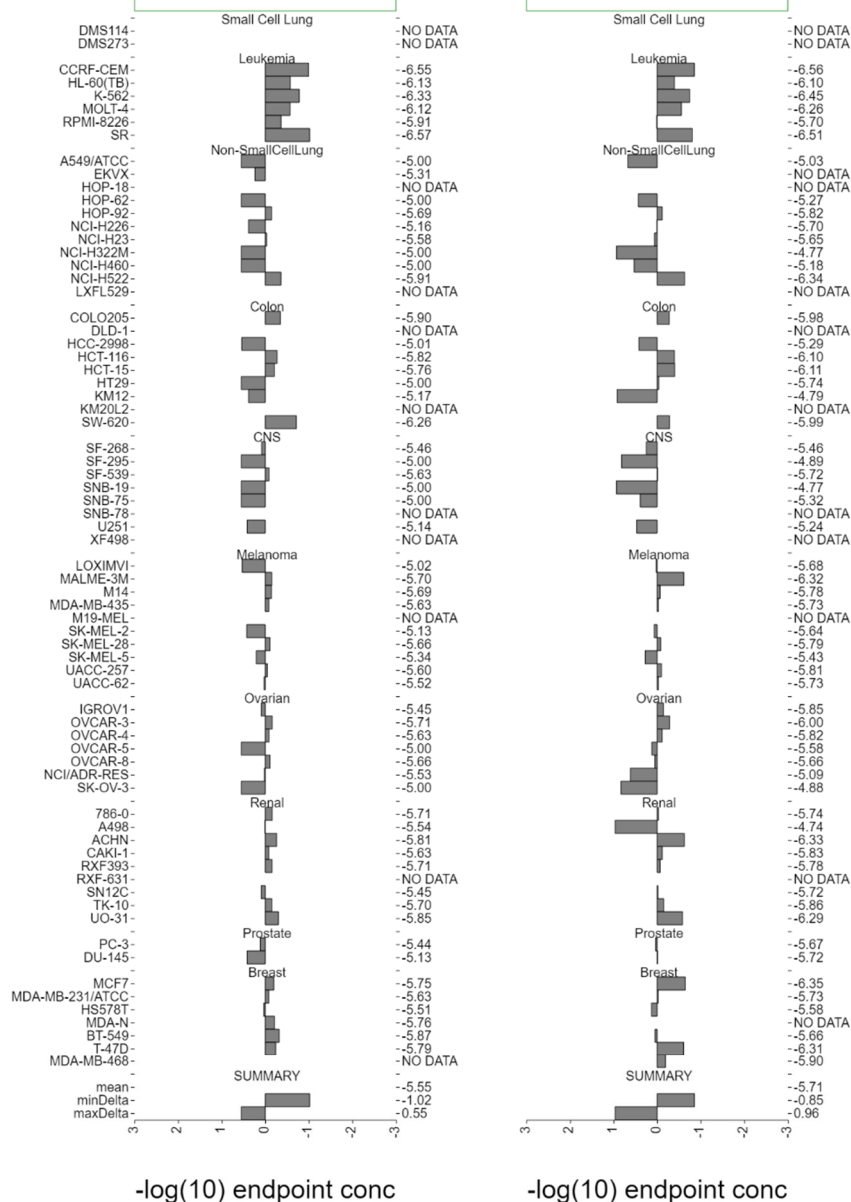

Figure S43

# COMPARE Analysis of 14e (NSC661221) to Pleurotin (NSC401005)

---SEED---

NSC:S661221 Endpoint:GI50 ExpId:AVGDATAlogHiConc:-4.0  
Id: 425824 Count Experiments:2

---TARGET---

NSC:S401005 Endpoint:GI50 ExpId:AVGDATAlogHiConc:-4.0  
Id: 243481 Count Experiments:2

Correlation:0.85

JobId: 8272752536982514267

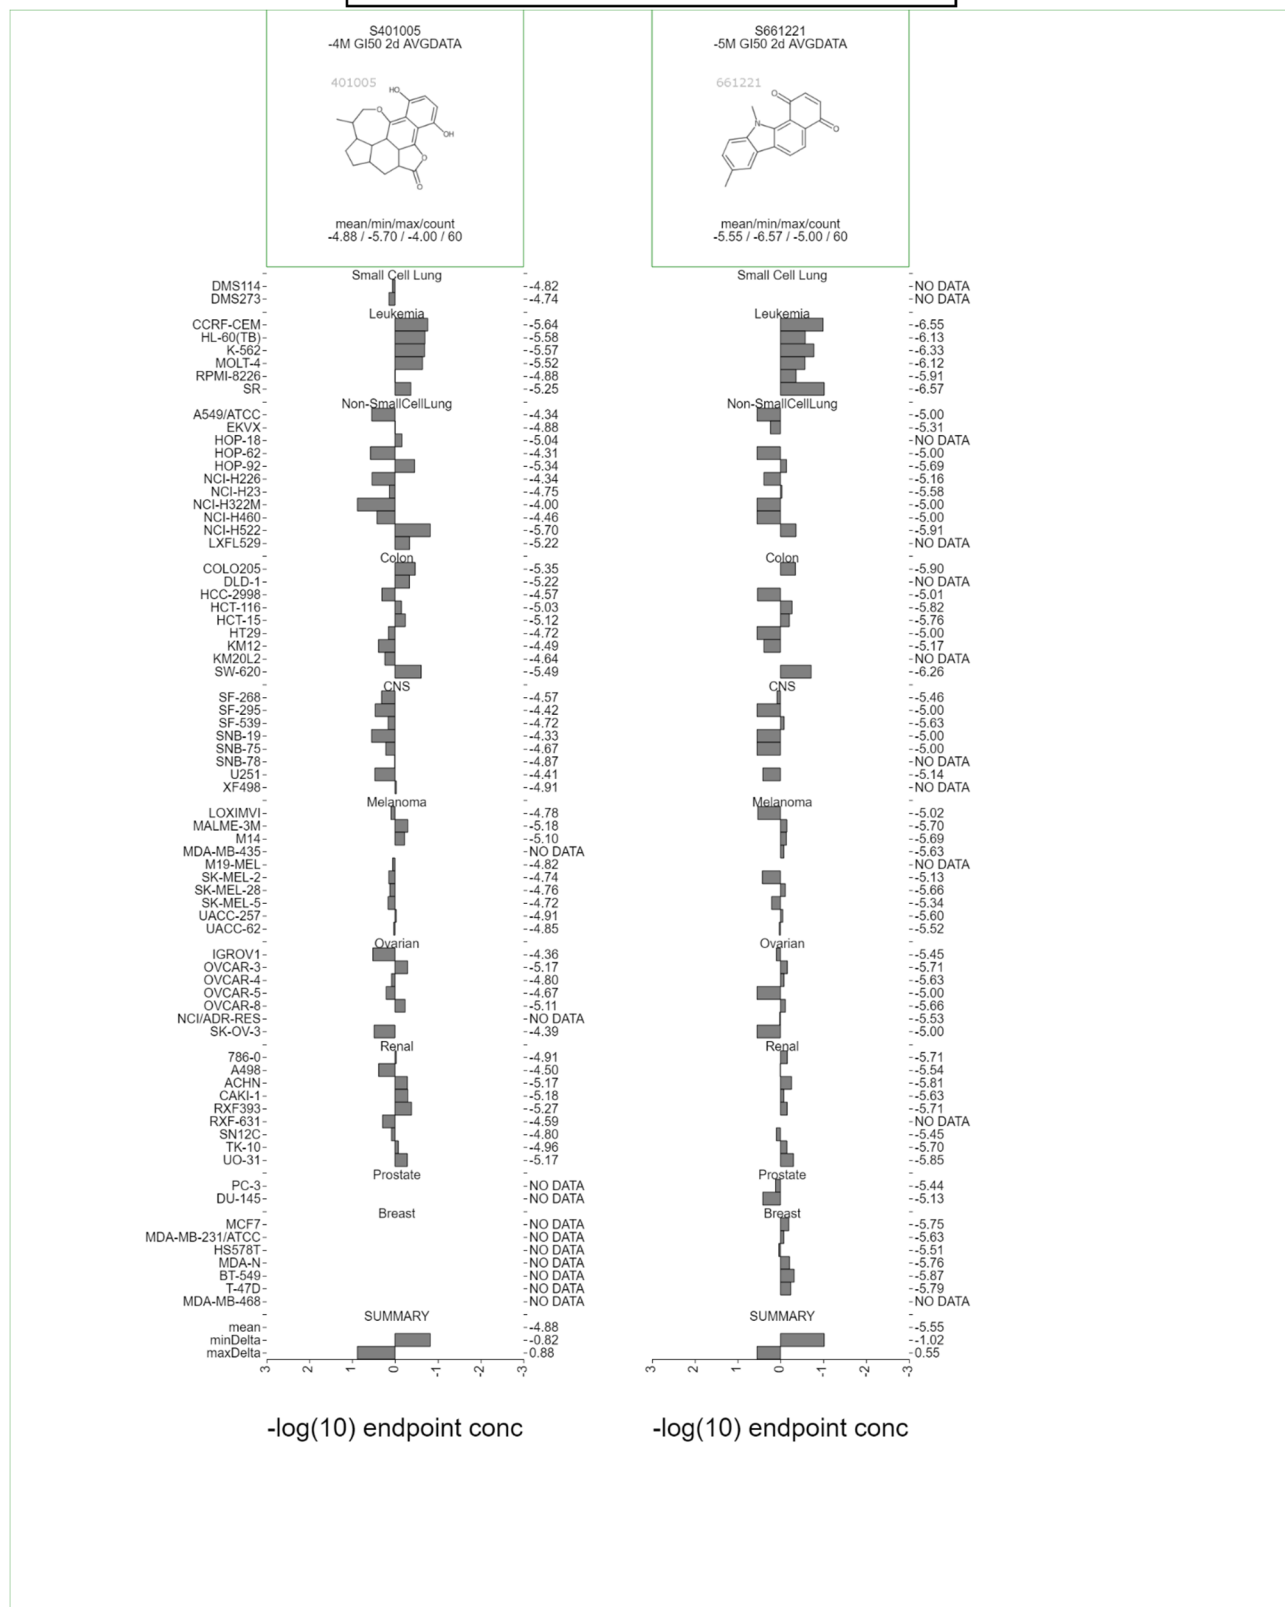

Figure S44

# COMPARE Analysis of 5a (NSC768093) to 14f (NSC641396)

---SEED---

NSC:S768093 Endpoint:GI50 ExpId:AVGDATA logHiConc:-4.0  
Id: 253700 Count Experiments:2

---TARGET---

NSC:S641396 Endpoint:GI50 ExpId:AVGDATA logHiConc:-4.0  
Id: 182589 Count Experiments:4

Correlation:0.77

JobId: 6992511647736348161

S641396  
-4M GI50 2d AVGDATA

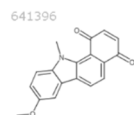

mean/min/max/count  
-5.03 / -6.34 / -4.38 / 70

S768093  
-4M GI50 2d AVGDATA

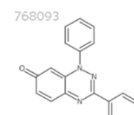

mean/min/max/count  
-5.71 / -6.56 / -4.74 / 59

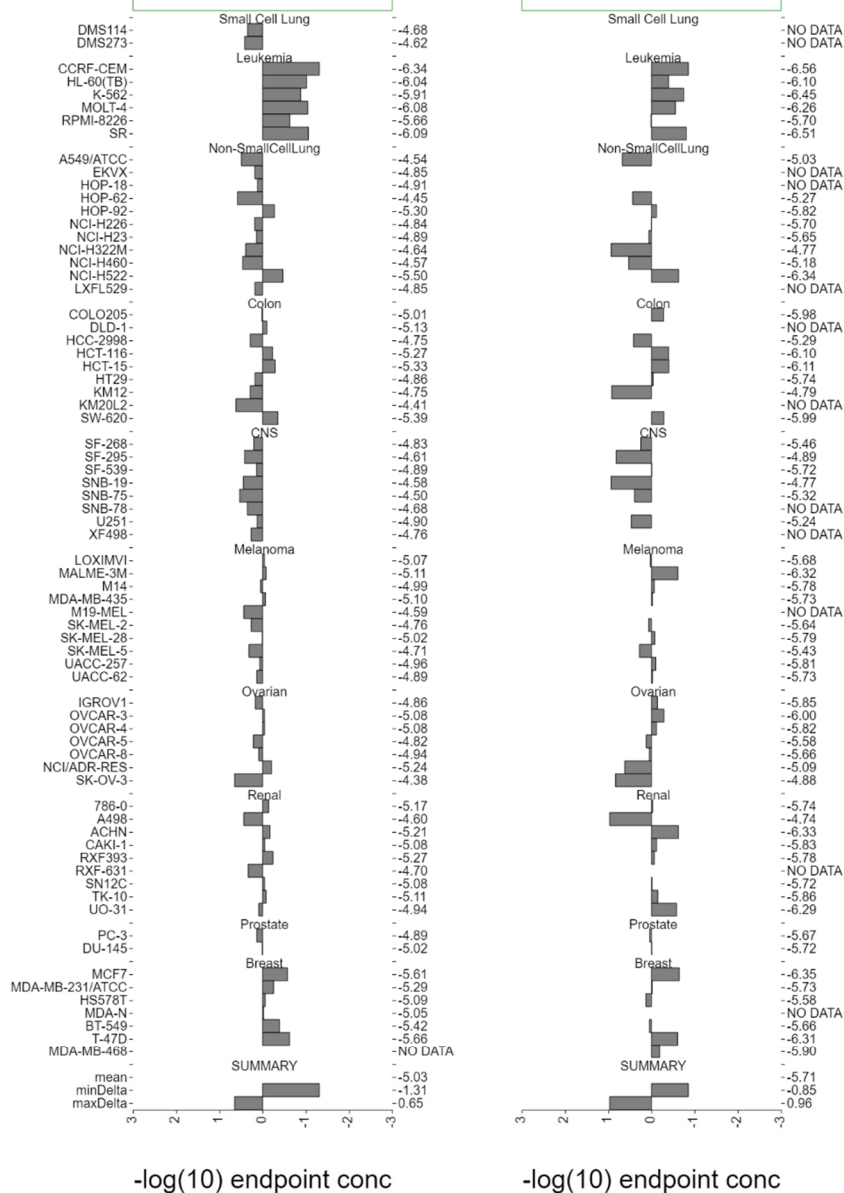

Figure S45

COMPARE Analysis of **14f** (NSC641396) to Pleurotin (NSC401005)

---SEED---

NSC:S641396 Endpoint:GI50 ExpId:AVGDATAlogHiConc:-4.0

Id: 182589 Count Experiments:4

---TARGET---

NSC:S401005 Endpoint:GI50 ExpId:AVGDATAlogHiConc:-4.0

Id: 243481 Count Experiments:2

Correlation:0.78

JobId: 7250576864606418500

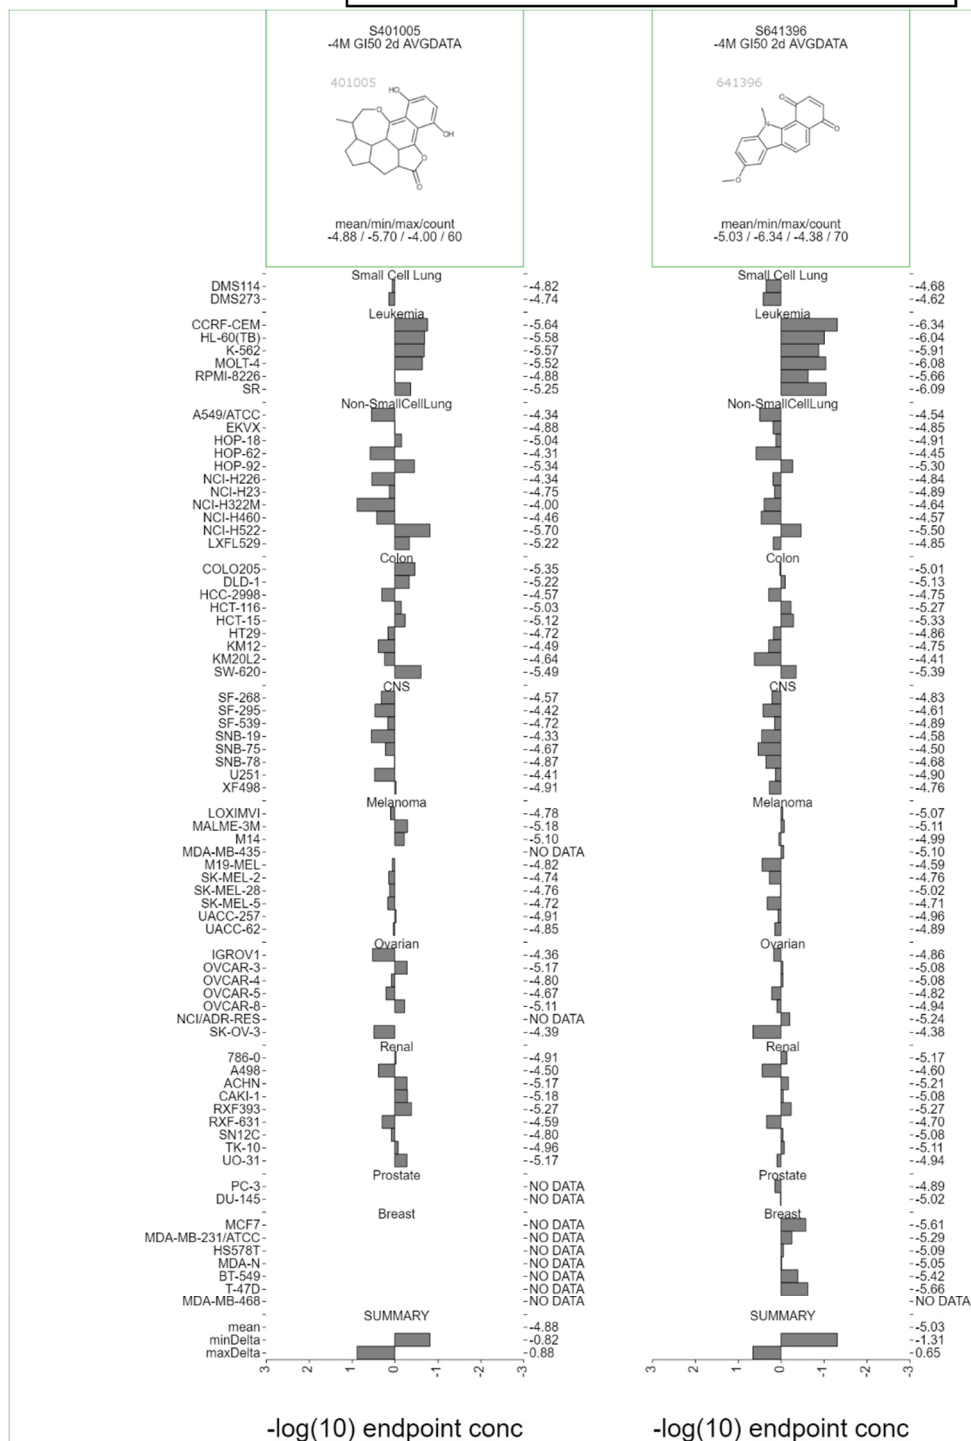

Figure S46

# COMPARE Analysis of 5a (NSC768093) to Kalafungin (NSC137443)

---SEED---

NSC:S768093 Endpoint:GI50 ExpId:AVGDATAlogHiConc:-4.0  
Id: 253700 Count Experiments:2

---TARGET---

NSC:S137443 Endpoint:GI50 ExpId:AVGDATAlogHiConc:-4.0  
Id: 71608 Count Experiments:2

Correlation:0.81

JobId: 9060594243988086729

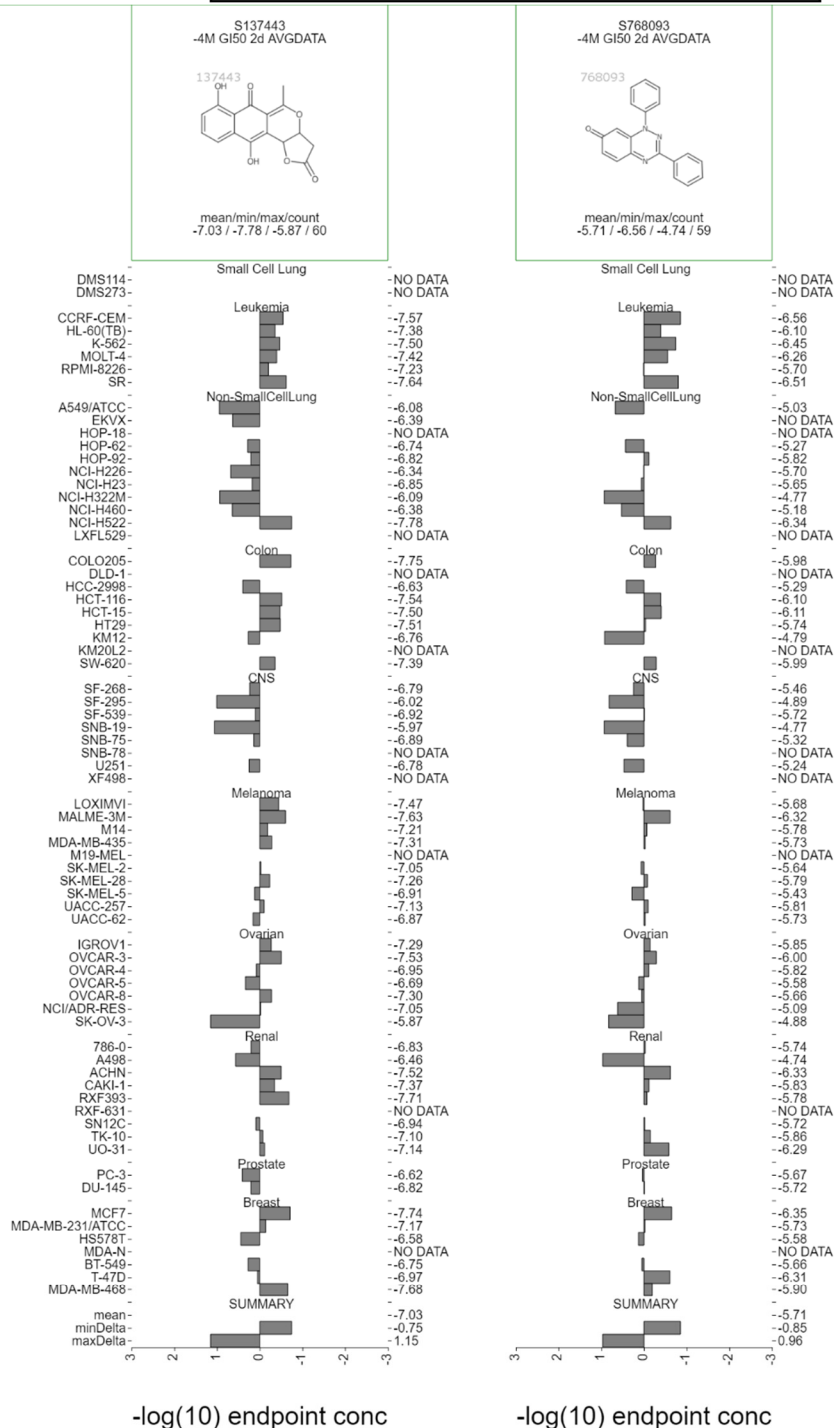

Figure S47

# COMPARE Analysis of Kalafungin (NSC137443) to Pleurotin (NSC401005)

---SEED---

NSC:S137443 Endpoint:GI50 ExpId:AVGDATAlogHiConc:-4.0  
Id: 71608 CountExperiments:2

---TARGET---

NSC:S401005 Endpoint:GI50 ExpId:AVGDATAlogHiConc:-4.0  
Id: 243481 CountExperiments:2

Correlation:0.79

JobId: 613988420058587479

S137443  
-4M GI50 2d AVGDATA

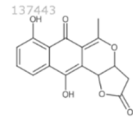

mean/min/max/count  
-7.03 / -7.76 / -5.67 / 60

S401005  
-4M GI50 2d AVGDATA

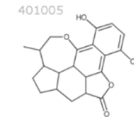

mean/min/max/count  
-4.88 / -5.70 / -4.00 / 60

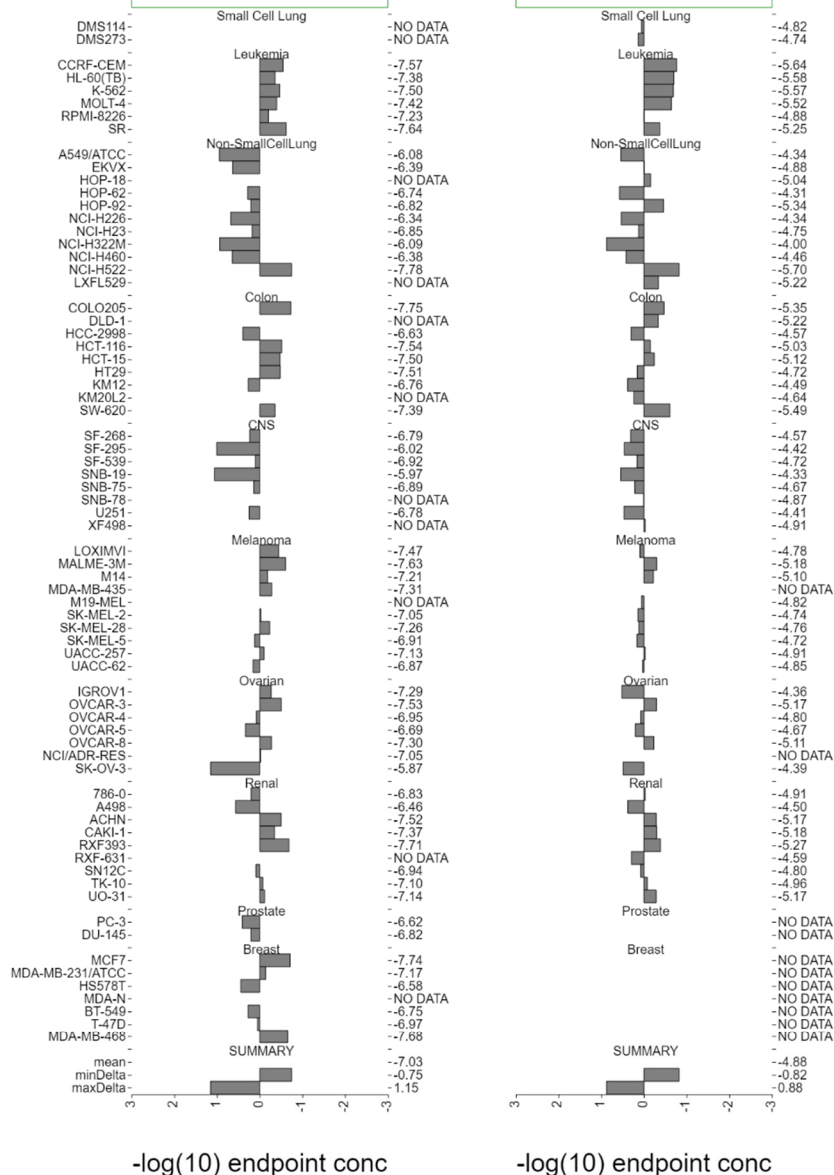

Figure S48



# COMPARE Analysis of 5a (NSC768093) to Nanaomycin A (NSC267461)

---SEED---

NSC:S768093 Endpoint:GI50 Expld:AVGDATA logHiConc:-4.0  
Id: 253700 Count Experiments: 2

---TARGET---

NSC:S267461 Endpoint:GI50 Expld:AVGDATA logHiConc:-4.0  
Id: 121294 Count Experiments: 4

Correlation: 0.72

JobId: 4481058418583182031

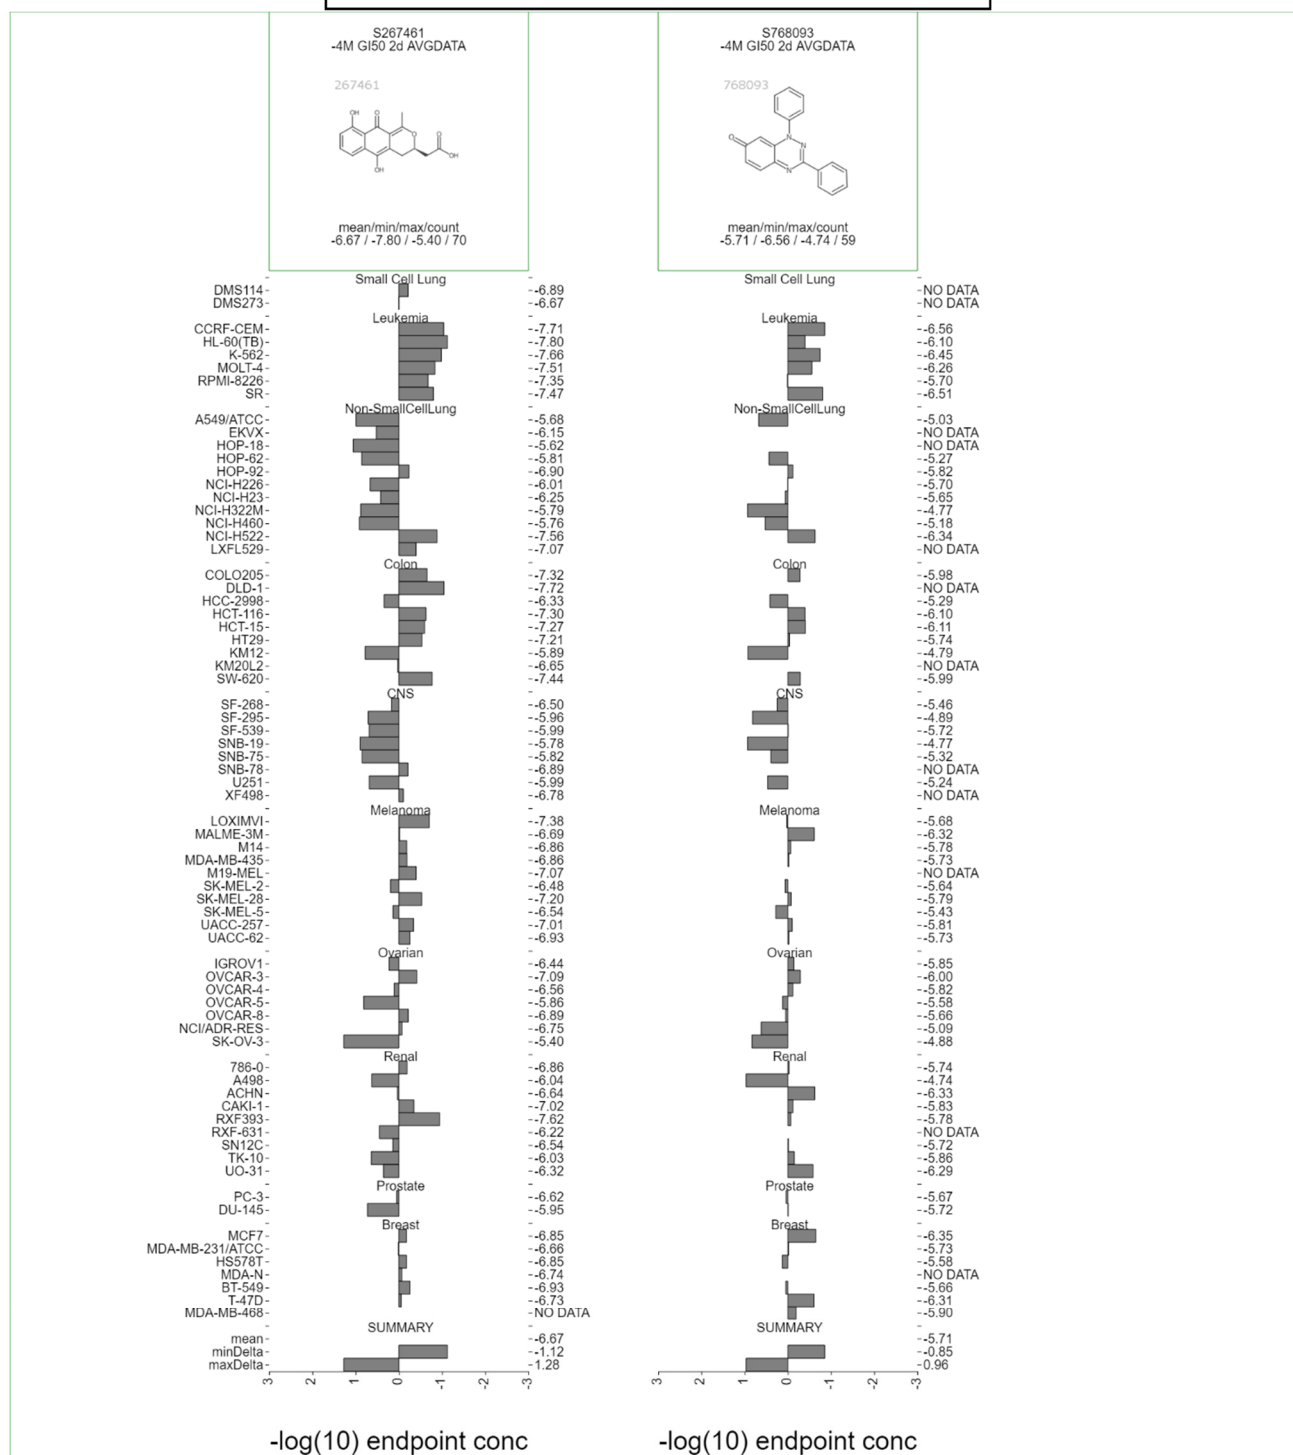

Figure S49

# COMPARE Analysis of Nanaomycin A (NSC267461) to Pleurotin (NSC401005)

---SEED---

NSC:S267461 Endpoint:GI50 ExpId:AVGDATA logHiConc:-4.0  
Id: 121294 Count Experiments:4

---TARGET---

NSC:S401005 Endpoint:GI50 ExpId:AVGDATA logHiConc:-4.0  
Id: 243481 Count Experiments:2

Correlation:0.79

JobId: 2128577860017888719

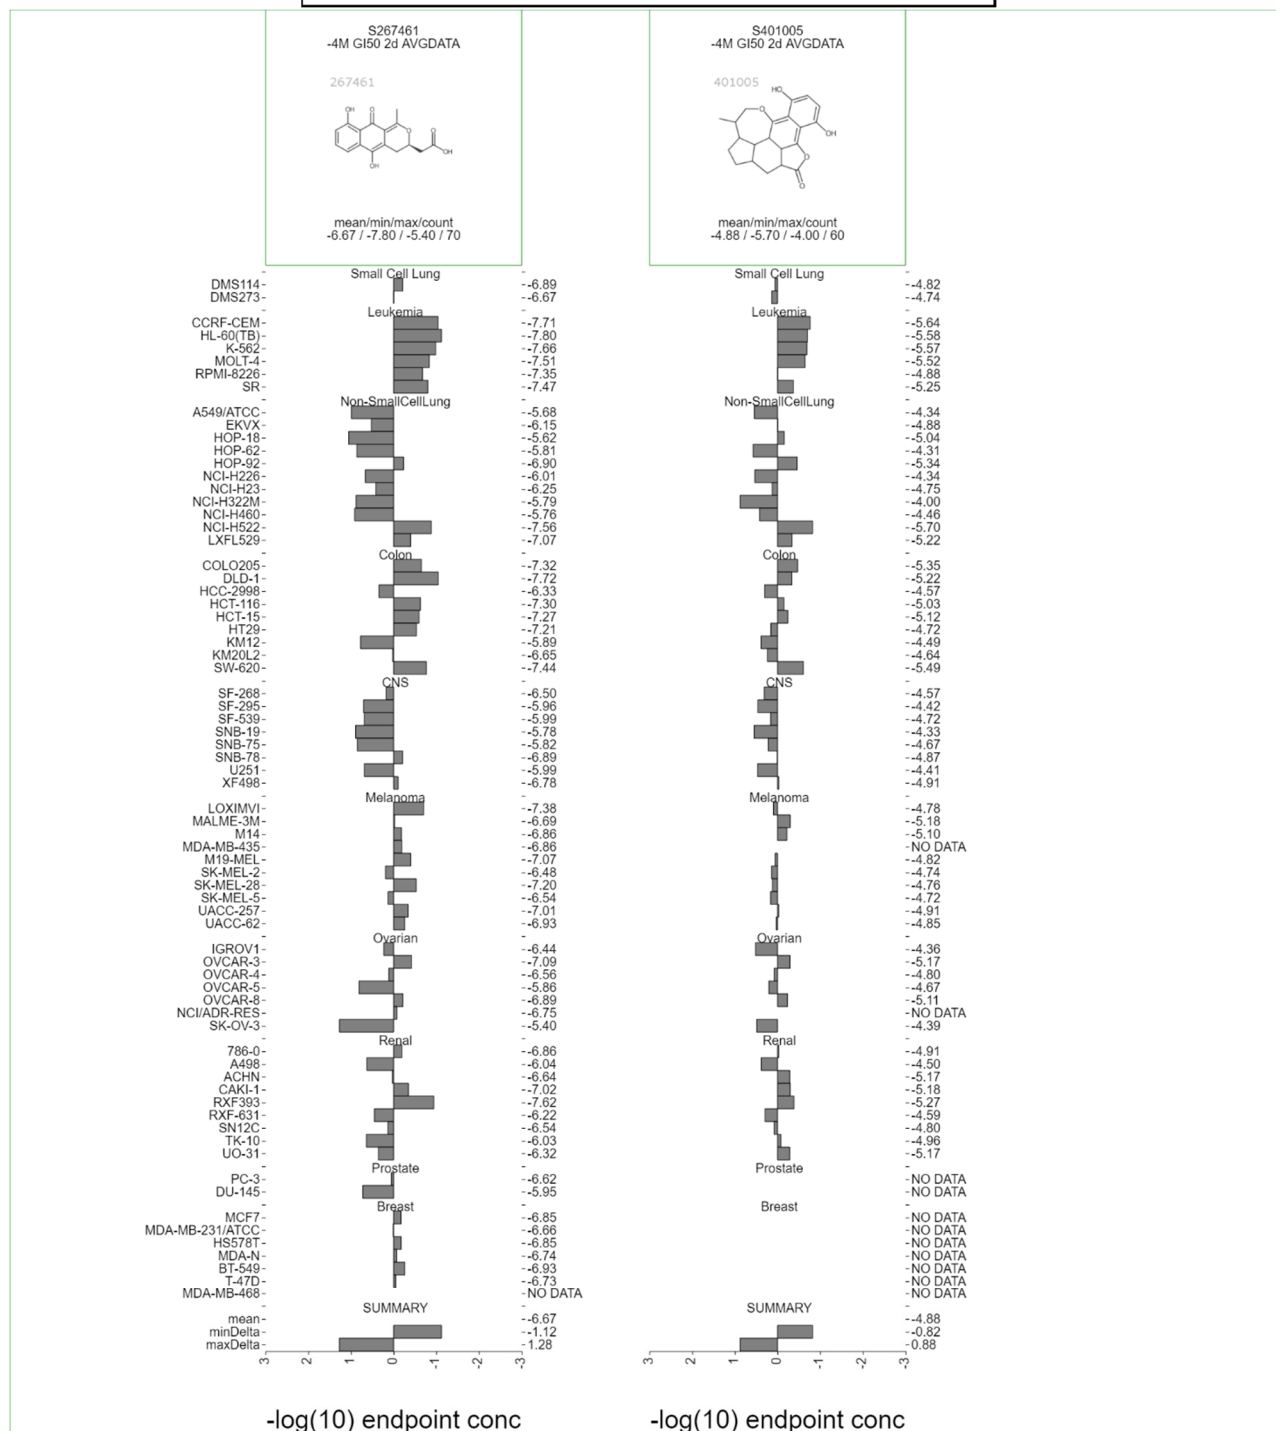

Figure S50

# COMPARE Analysis of 5a (NSC768093) to 15a (NSC641401)

---SEED---

NSC:5768093 Endpoint:GI50 ExpId:AVGDATA logHiConc:-4.0  
Id: 253700 Count Experiments:2

---TARGET---

NSC:5641401 Endpoint:GI50 ExpId:AVGDATA logHiConc:-4.0  
Id: 303785 Count Experiments:1

Correlation:0.78

JobId: 5187925863101103006

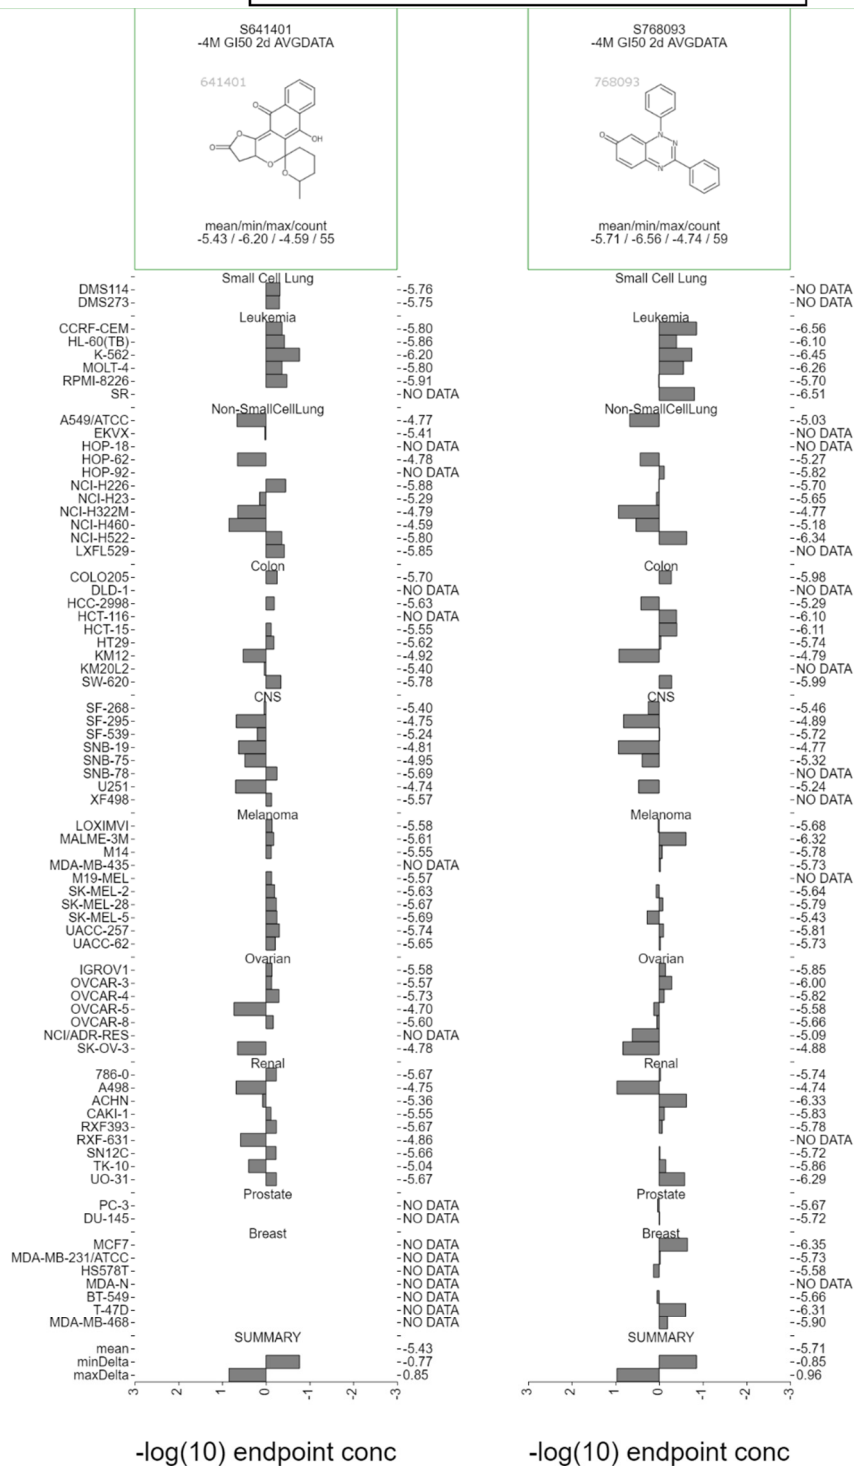

Figure S51

# COMPARE Analysis of 15a (NSC641401) to Pleurotin (NSC401005)

---SEED---

NSC:S641401 Endpoint:GI50 ExpId:AVGDATA logHiConc:-4.0  
Id: 303785 Count Experiments:1

---TARGET---

NSC:S401005 Endpoint:GI50 ExpId:AVGDATA logHiConc:-4.0  
Id: 243481 Count Experiments:2

Correlation:0.68

JobId: 9106697070602025420

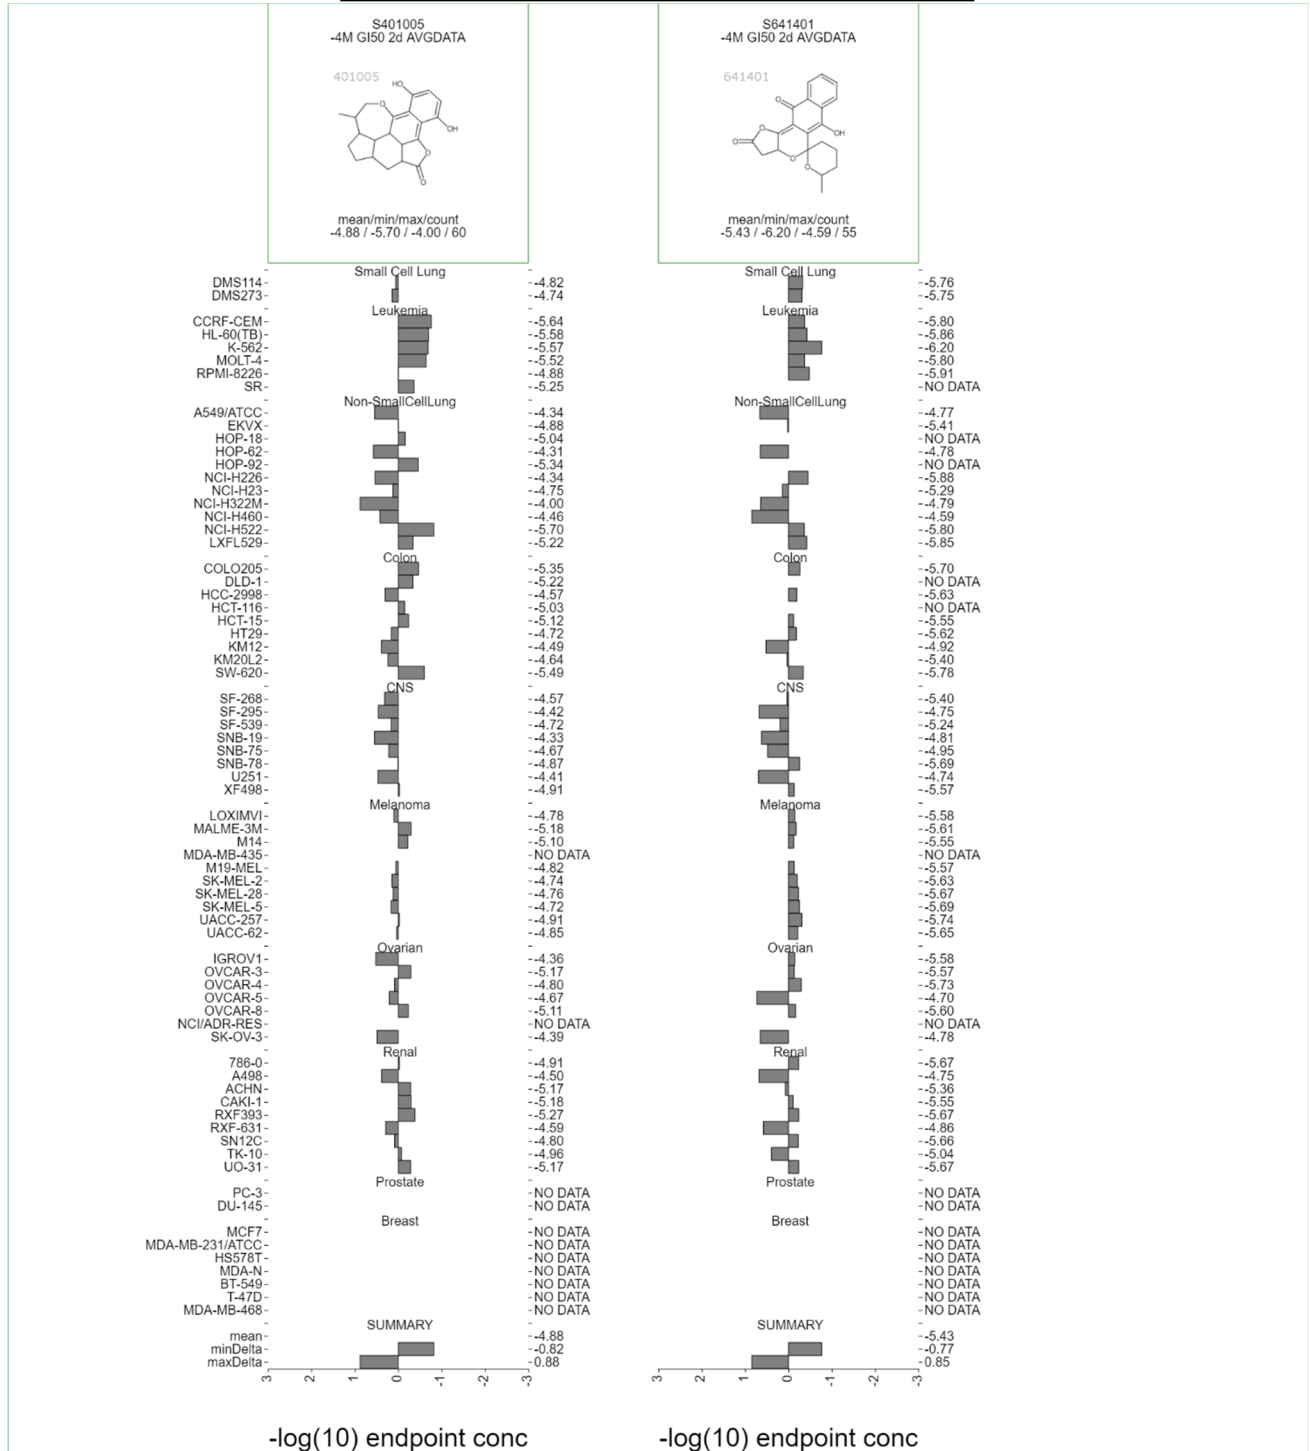

Figure S52

# COMPARE Analysis of 5a (NSC768093) to Discorhabdin C (NSC626162)

---SEED---

NSC:S768093 Endpoint:GI50 Expld:AVGDATA logHiConc:-4.0  
Id: 253700 Count Experiments: 2

---TARGET---

NSC:S626162 Endpoint:GI50 Expld:AVGDATA logHiConc:-4.0  
Id: 421973 Count Experiments: 5

Correlation: 0.78

JobId: 193534783601839350

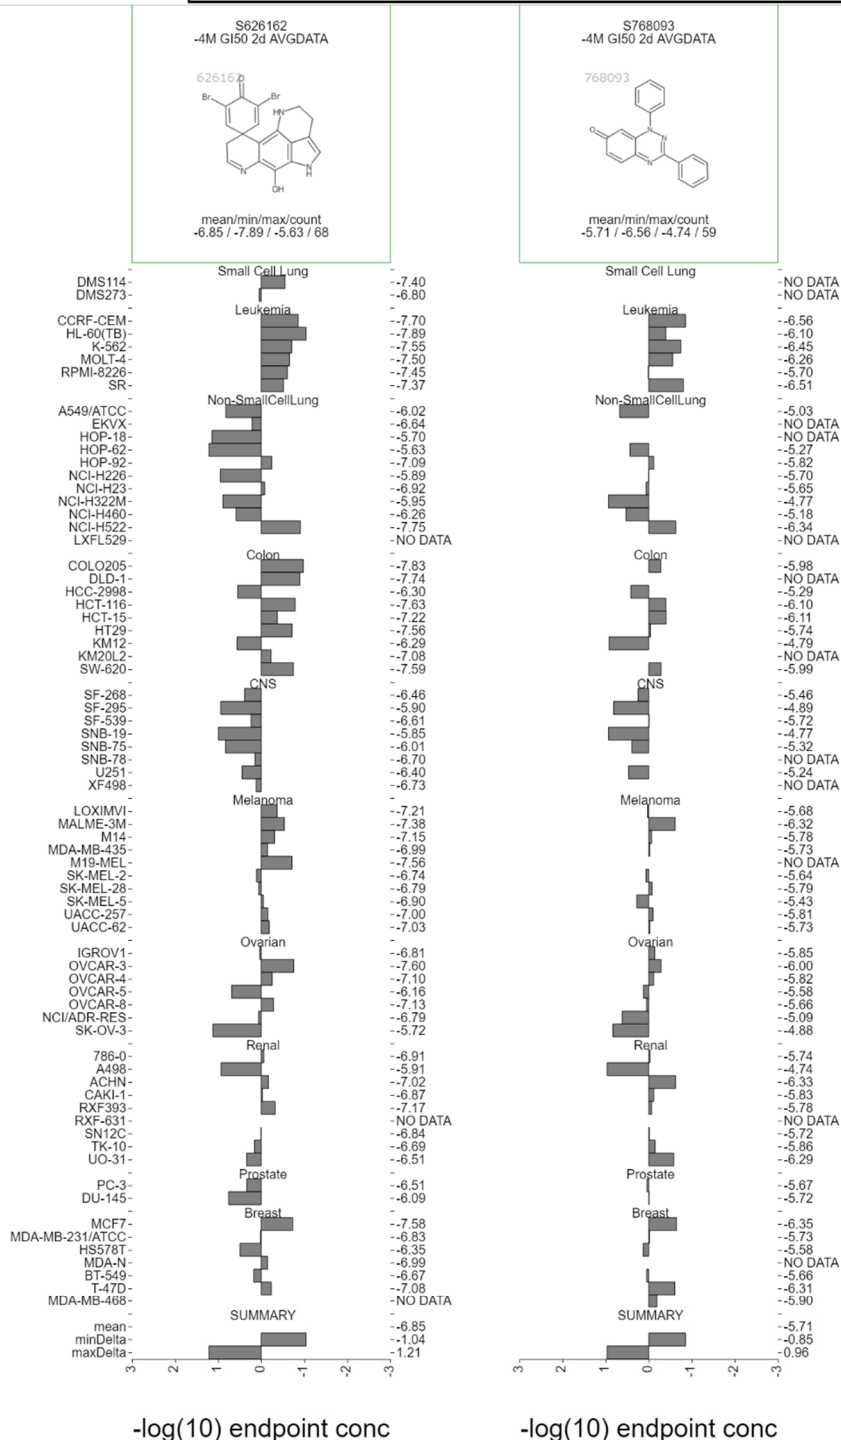

Figure S53

COMPARE Analysis of Discorhabdin C (NSC626162) to Pleurotin (NSC401005)

---SEED---

NSC:S626162 Endpoint:GI50 ExpId:AVGDATA logHiConc:-4.0  
Id: 421973 Count Experiments:5

---TARGET---

NSC:S401005 Endpoint:GI50 ExpId:AVGDATA logHiConc:-4.0  
Id: 243481 Count Experiments:2

Correlation:0.78

JobId: 1403932220819377460

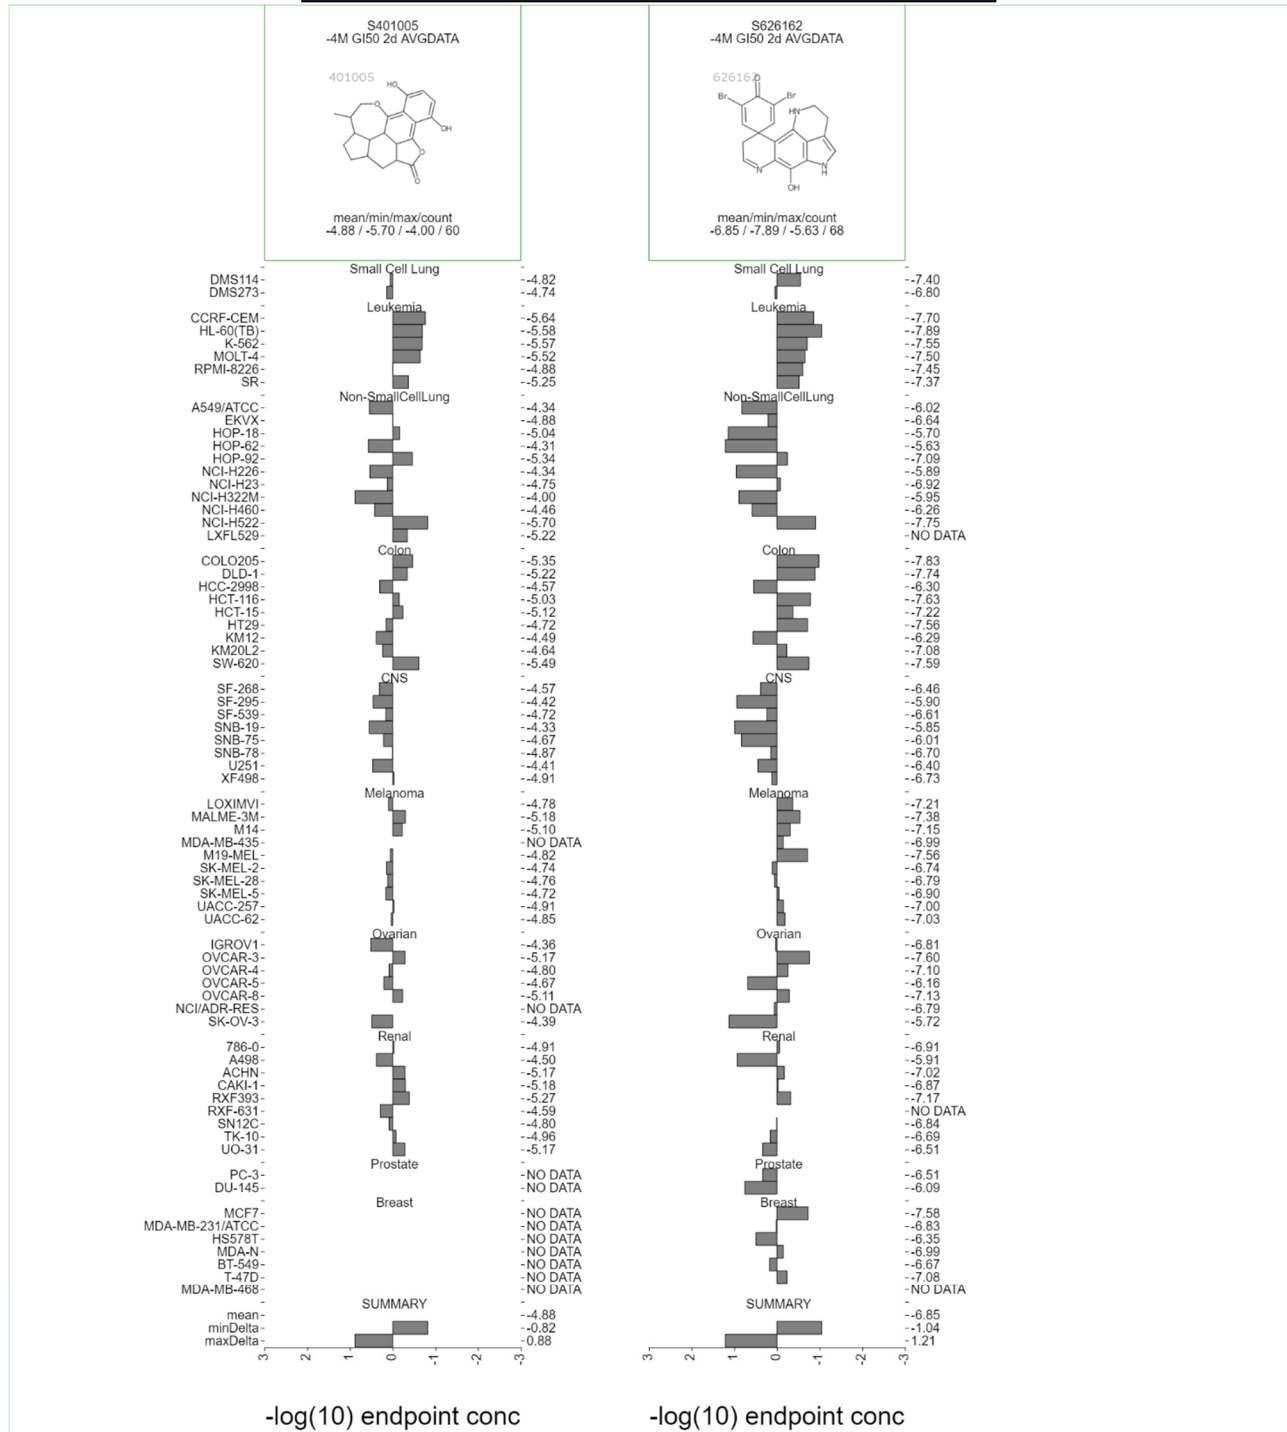

Figure S54

# COMPARE Analysis of 5a (NSC768093) to 9b (NSC682995)

---SEED---

NSC:5768093 Endpoint:GI50 ExpId:AVGDATA logHiConc:-4.0  
Id: 253700 Count Experiments: 2

---TARGET---

NSC:5682995 Endpoint:GI50 ExpId:AVGDATA logHiConc:-4.0  
Id: 4367529 Count Experiments: 2

Correlation: 0.71

JobId: 5303183562120266702

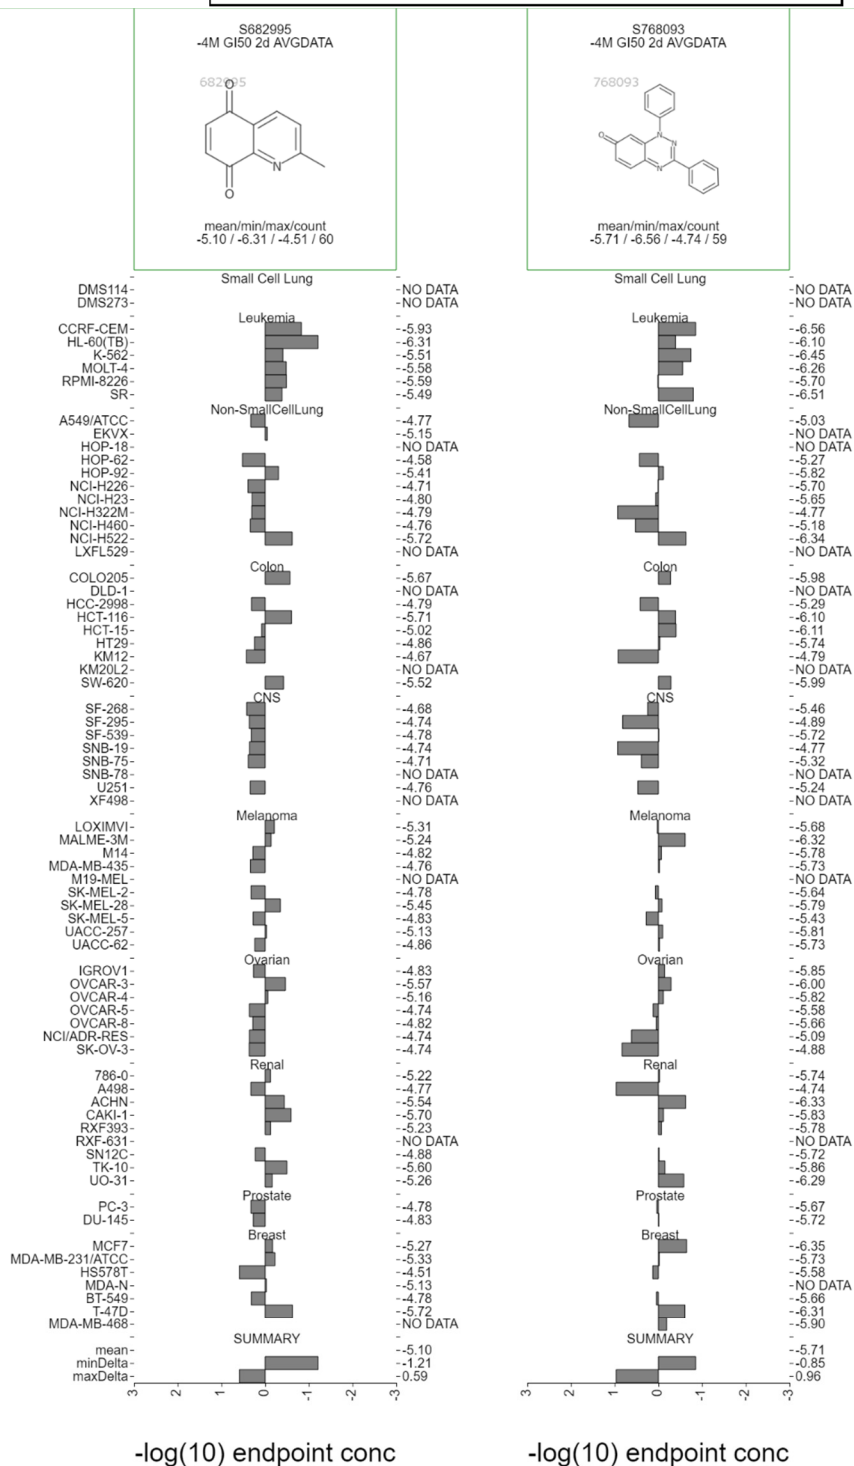

Figure S55

# COMPARE Analysis of 9b (NSC682995) to Pleurotin (NSC401005)

---SEED---

NSC:5682995 Endpoint:GI50 ExpId:AVGDATA logHiConc:-4.0  
Id: 4367529 Count Experiments: 2

---TARGET---

NSC:5401005 Endpoint:GI50 ExpId:AVGDATA logHiConc:-4.0  
Id: 243481 Count Experiments: 2

Correlation:0.81

JobId: 8272072227347731043

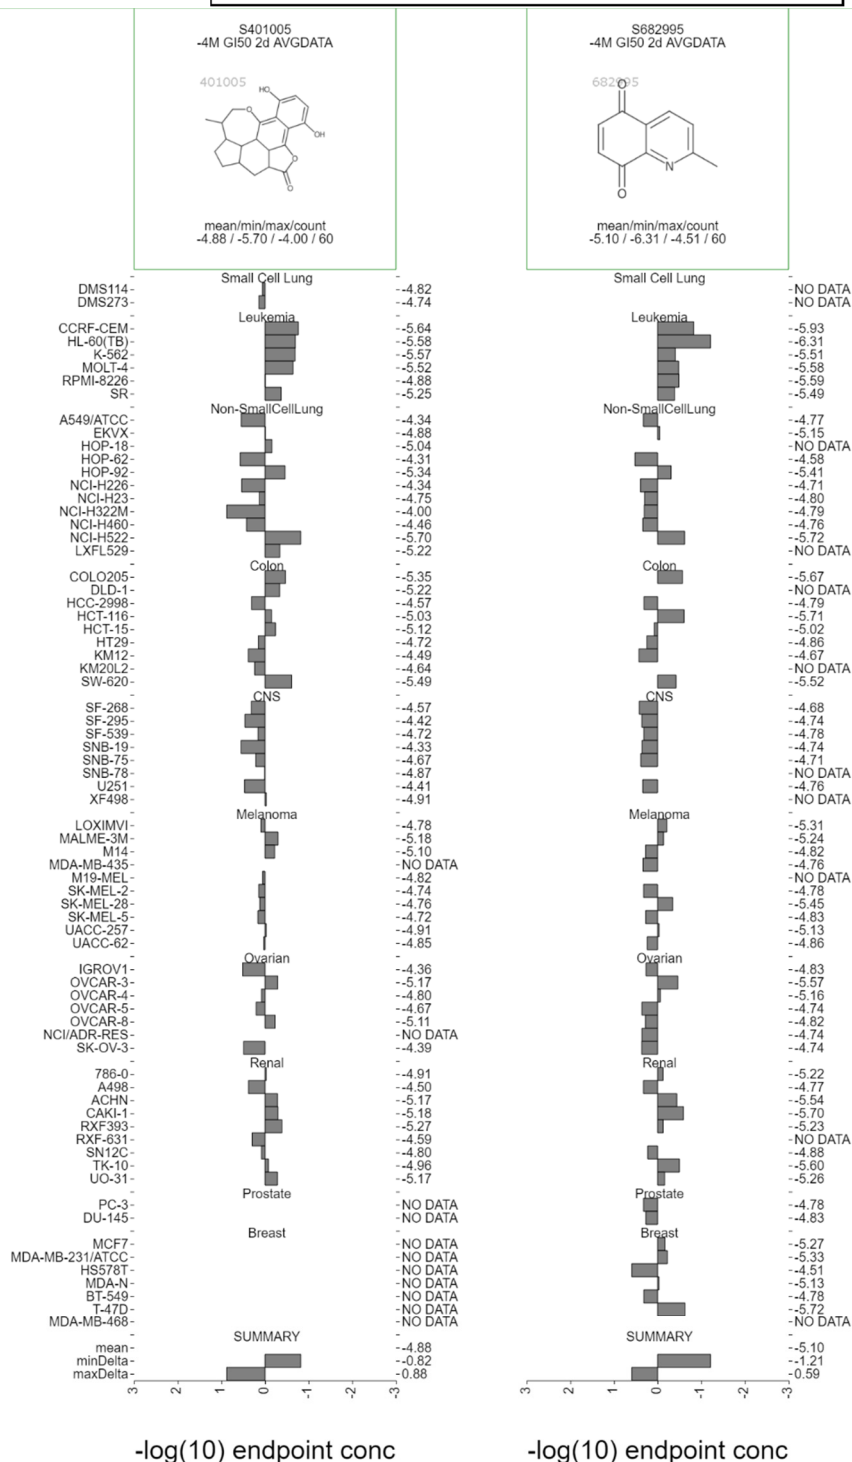

Figure S56



# COMPARE Analysis of 5a (NSC768093) to MMB analogue (NSC801078)

---SEED---

NSC:768093 Endpoint:GI50 Expld:AVGDATA logHiConc:-4.0

Id: 253700 Count Experiments: 2

---TARGET---

NSC:S801078 Endpoint:GI50 Expld:AVGDATA logHiConc:-4.0

Id: 133157 Count Experiments: 1

Correlation:0.86

JobId: 8801576231309923097

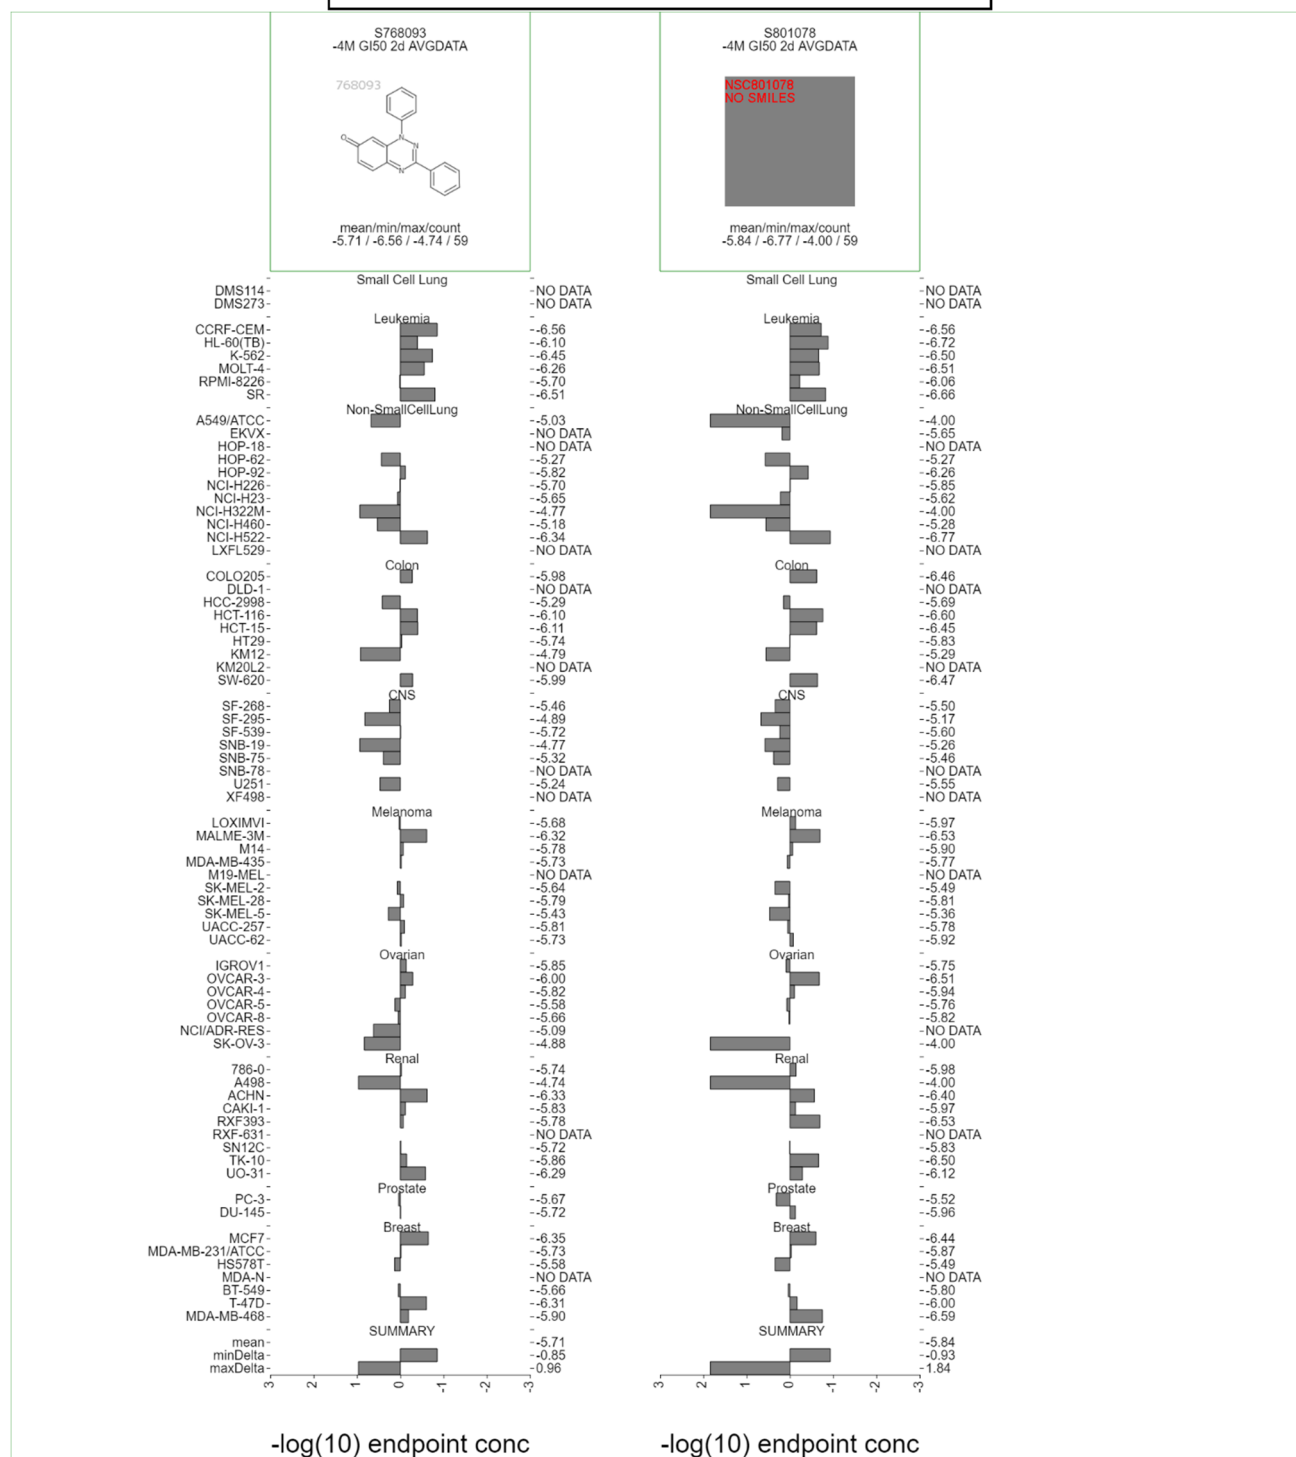

Figure S57

# COMPARE Analysis of MMB analogue (NSC801078) to Pleurotin (NSC401005)

---SEED---

NSC:S801078 Endpoint:GI50 Expld:AVGDATA logHiConc:-4.0  
Id: 133157 Count Experiments:1

---TARGET---

NSC:S401005 Endpoint:GI50 Expld:AVGDATA logHiConc:-4.0  
Id: 243481 Count Experiments:2

Correlation:0.82

JobId: 866925007213814722

S401005  
-4M GI50 2d AVGDATA

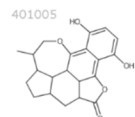

mean/min/max/count  
-4.88 / -5.70 / -4.00 / 60

S801078  
-4M GI50 2d AVGDATA

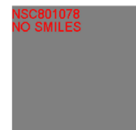

mean/min/max/count  
-5.84 / -6.77 / -4.00 / 59

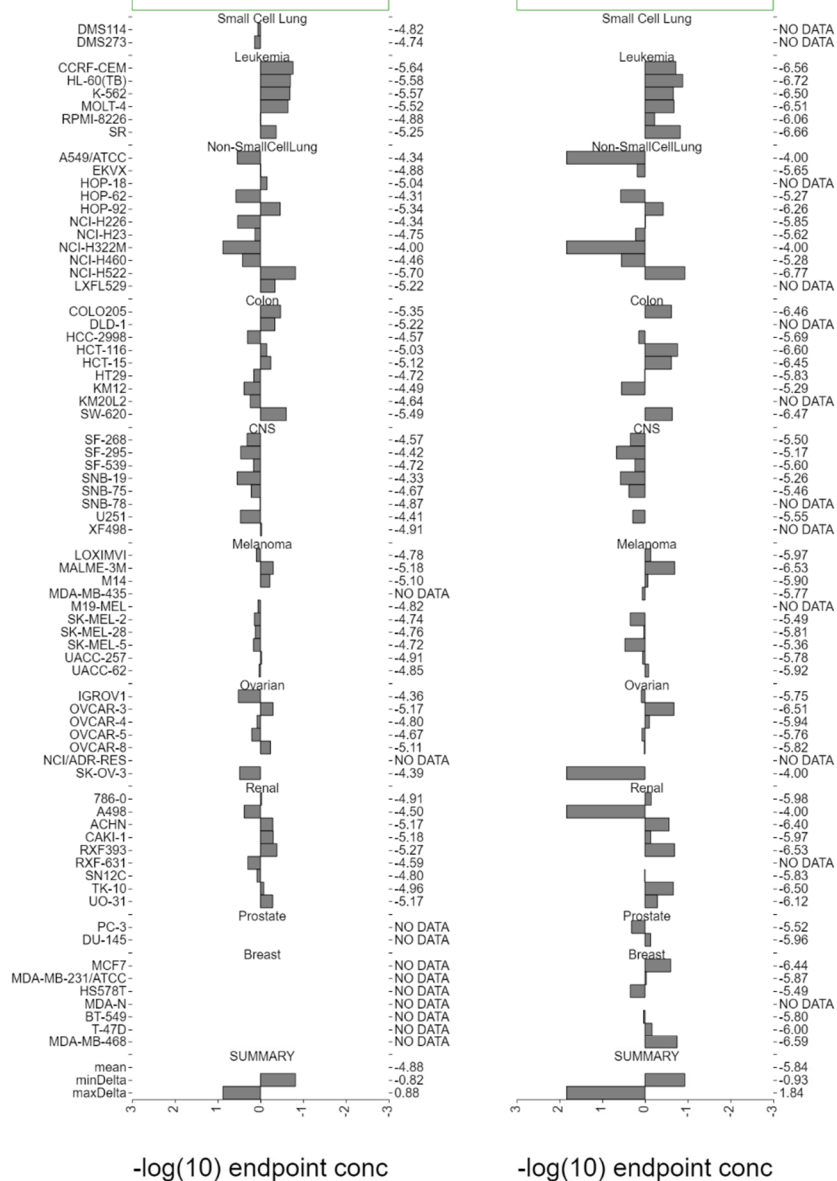

Figure S58

# COMPARE Analysis of NQO1 to 19 (NSC409304)

---SEED---

MoltId:MT22 Genecard:NQO1 TargetSet:MOLTID\_MT\_SERIES

---TARGET---

NSC:S409304 Endpoint:GI50 ExpId:AVGDATAlogHiConc:-4.0

Id: 251495 CountExperiments:1

Correlation:0.67

JobId: 7364063256090692400

S409304  
-4M GI50 2d AVGDATA

409304

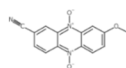

mean/min/max/count  
-5.44 / -6.67 / -4.33 / 55

NQO1  
MT22  
MOLTID\_MT\_SERIES

NQO1

MT22

NQO1  
MT22  
MOLTID\_MT\_SERIES  
mean/min/max/count  
2.52 / 1.48 / 3.78 / 64

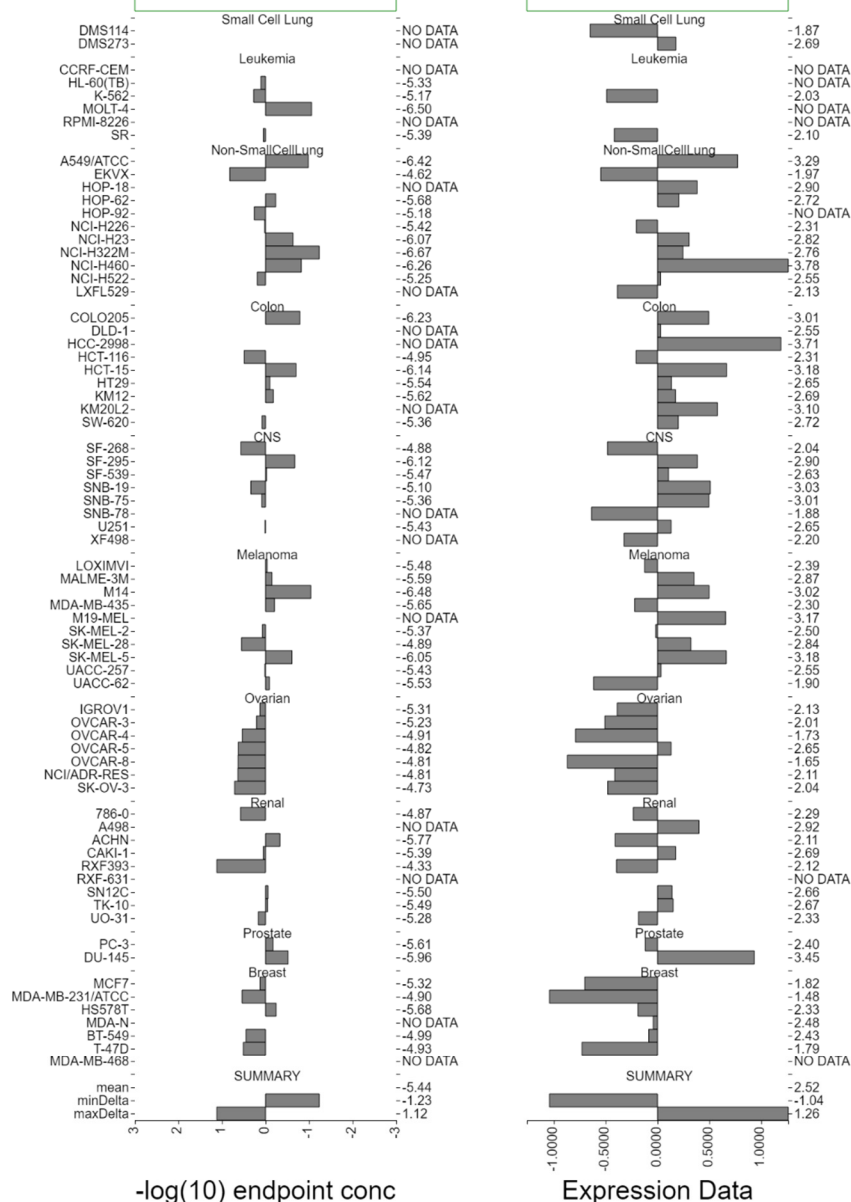

Figure S59

# COMPARE Analysis of 19 (NSC409304) to DPIQ (NSC753790)

---SEED---

NSC:S409304 Endpoint:GI50 ExpId:AVGDATA logHiConc:-4.0  
Id: 251495 CountExperiments:1

---TARGET---

NSC:S753790 Endpoint:GI50 ExpId:AVGDATA logHiConc:-4.0  
Id: 373263 CountExperiments:2

Correlation:0.51

JobId: 7364063256090692400

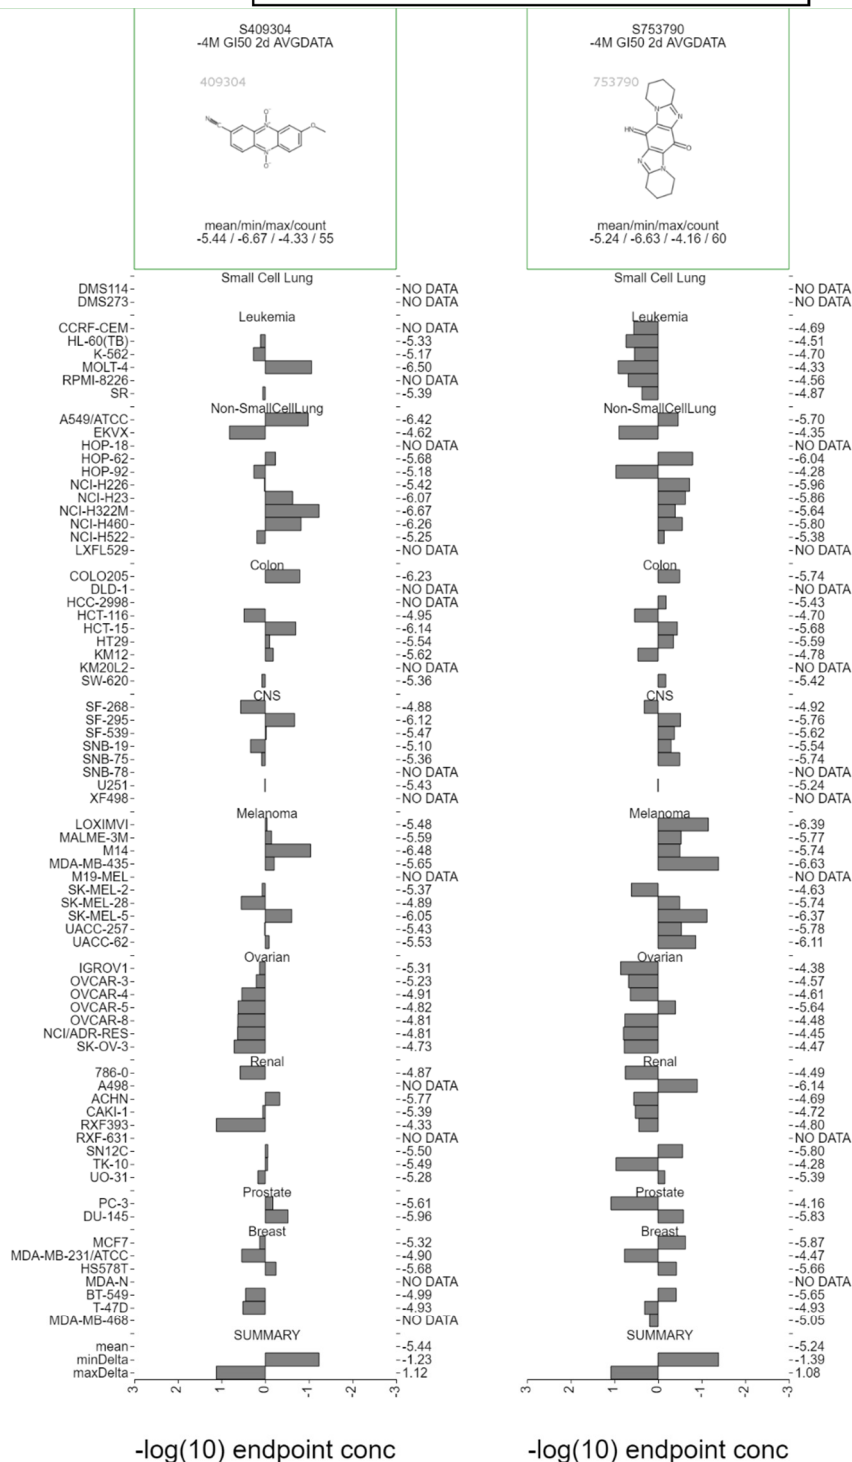

Figure S60

# COMPARE Analysis of NQO1 to 20 (NSC2785)

---SEED---

MoltId:MT22 Genecard:NQO1 TargetSet:MOLTID\_MT\_SERIES

---TARGET---

NSC:S2785 Endpoint:GI50 ExpId:AVGDATA logHiConc:-4.0

Id: 71580 CountExperiments:1

Correlation:0.66

JobId: 1356468010017973524

S2785  
-4M GI50 2d AVGDATA

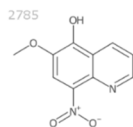

mean/min/max/count  
-5.26 / -6.50 / -4.02 / 58

NQO1  
MT22  
MOLTID\_MT\_SERIES

NQO1

MT22

NQO1  
MT22  
MOLTID\_MT\_SERIES  
mean/min/max/count  
2.52 / 1.48 / 3.78 / 64

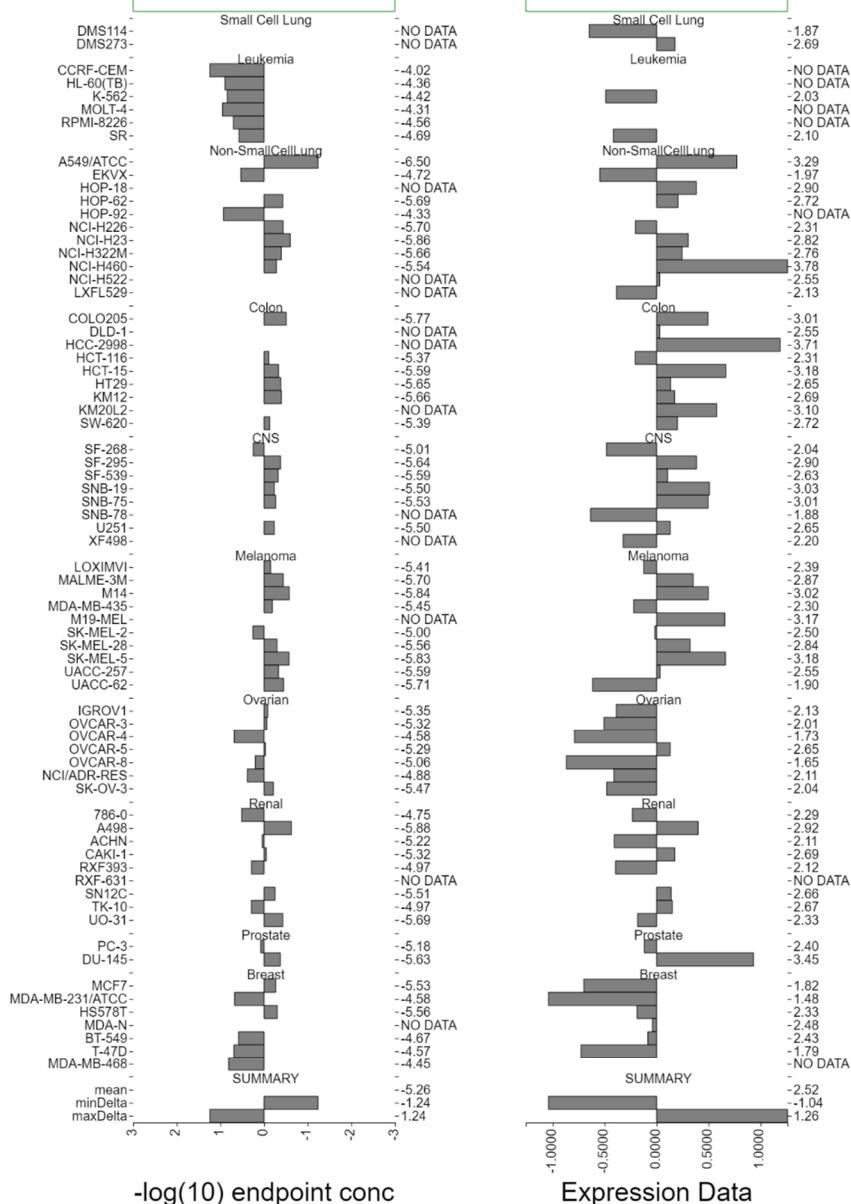

Figure S61

# COMPARE Analysis of 20 (NSC2785) to DPIQ (NSC753790)

---SEED---

NSC:S2785 Endpoint:GI50 ExpId:AVGDATA logHiConc:-4.0  
Id: 71580 Count Experiments:1

---TARGET---

NSC:S753790 Endpoint:GI50 ExpId:AVGDATA logHiConc:-4.0  
Id: 373263 Count Experiments:2

Correlation:0.69

JobId: 8298870972283168025

S2785  
-4M GI50 2d AVGDATA

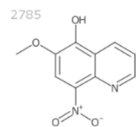

mean/min/max/count  
-5.26 / -6.50 / -4.02 / 58

S753790  
-4M GI50 2d AVGDATA

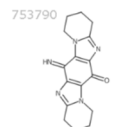

mean/min/max/count  
-5.24 / -6.63 / -4.16 / 60

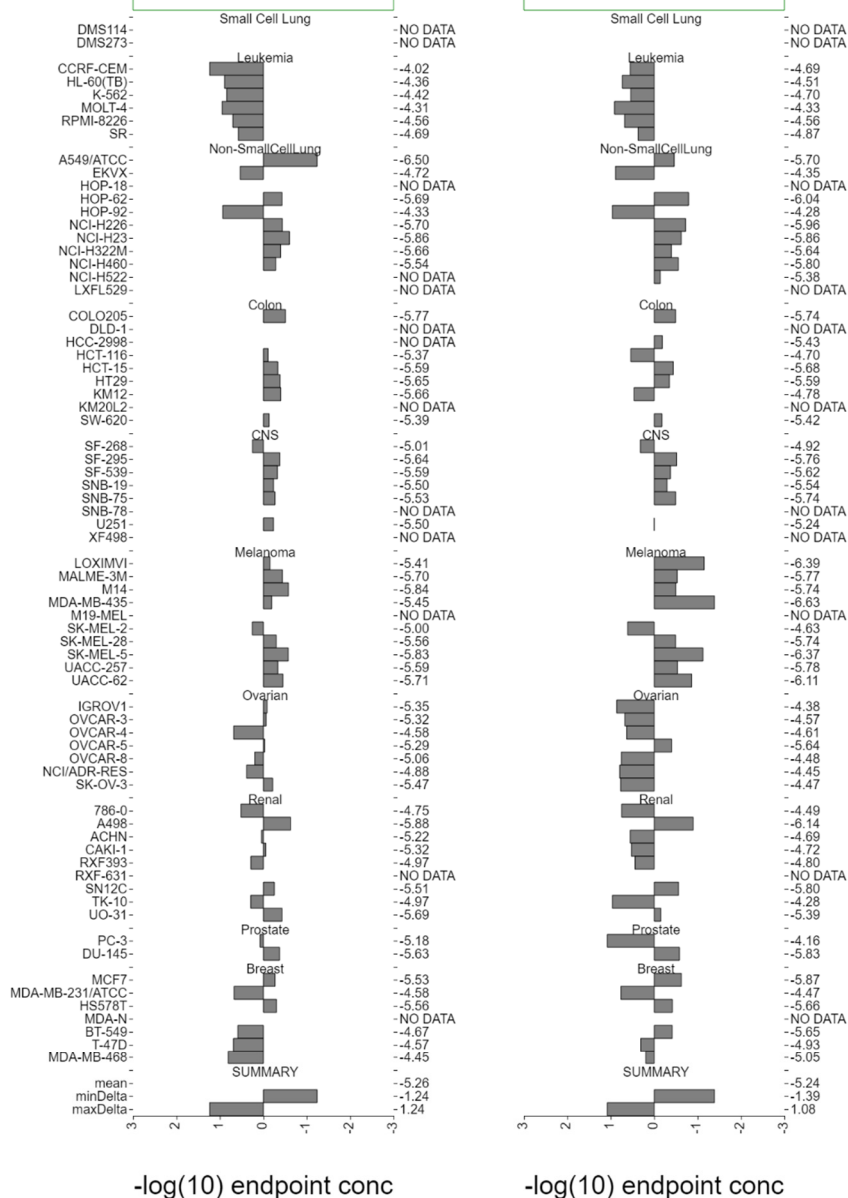

Figure S62

# COMPARE Analysis of NQO1 to 21a (NSC783640)

---SEED---

MoltId:MT22 Genecard:NQO1 TargetSet:MOLTID\_MT\_SERIES

---TARGET---

NSC:783640 Endpoint:GI50 ExpId:AVGDATAlogHiConc:-4.0

Id: 72655 Count Experiments: 2

Correlation:0.64

JobId: 7715194222435053083

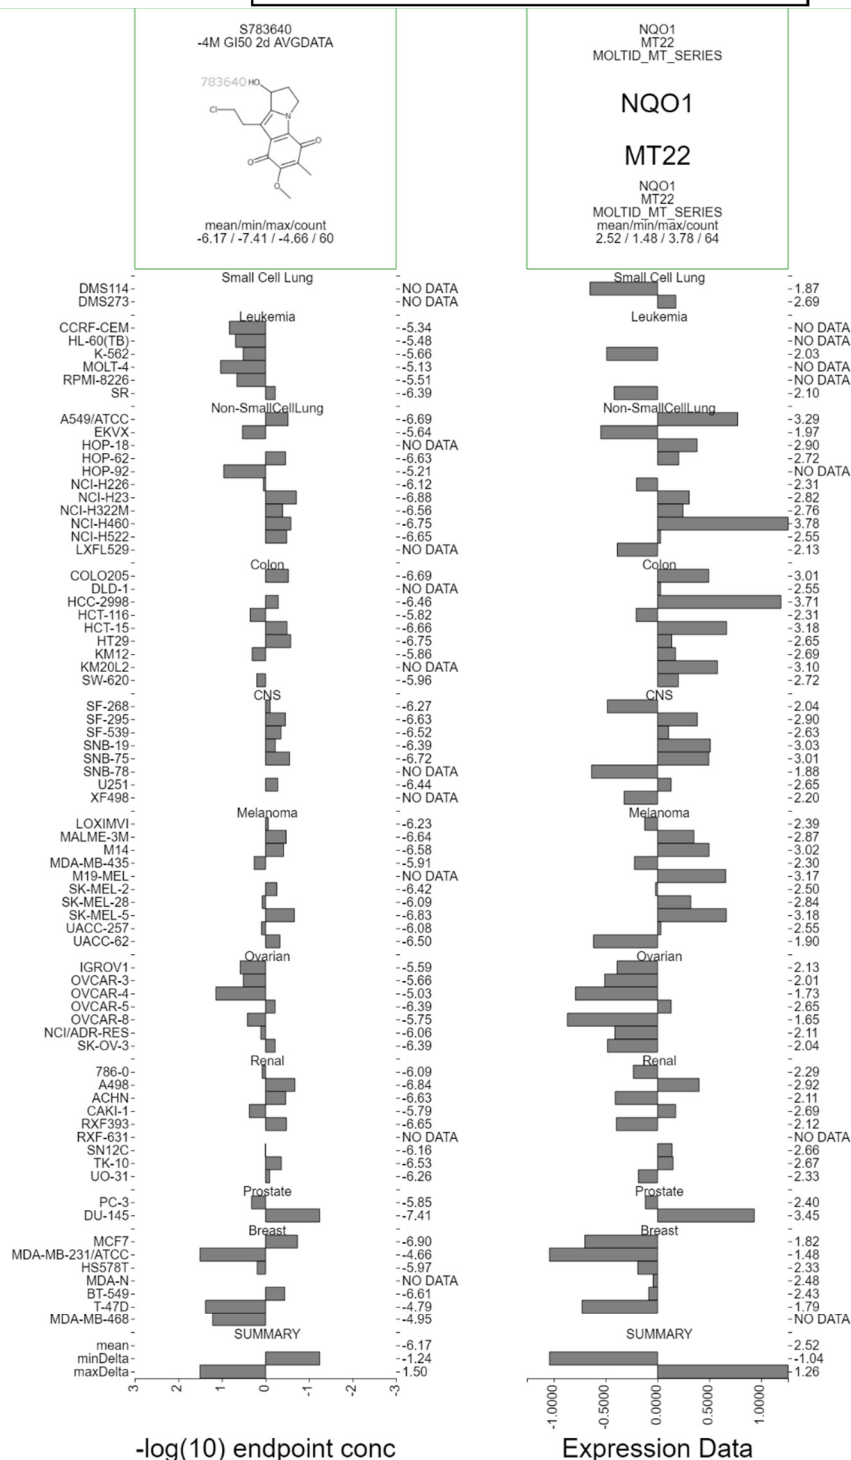

Figure S63

# COMPARE Analysis of 21a (NSC783640) to DPIQ (NSC753790)

---SEED---

NSC:S783640 Endpoint:GI50 Expld:AVGDATA logHiConc:-4.0

Id: 72655 Count Experiments: 2

---TARGET---

NSC:S753790 Endpoint:GI50 Expld:AVGDATA logHiConc:-4.0

Id: 373263 Count Experiments: 2

Correlation: 0.65

JobId: 771519422435053083

S753790  
-4M GI50 2d AVGDATA

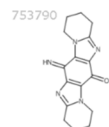

mean/min/max/count  
-5.24 / -6.63 / -4.16 / 60

S783640  
-4M GI50 2d AVGDATA

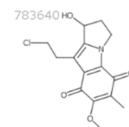

mean/min/max/count  
-6.17 / -7.41 / -4.66 / 60

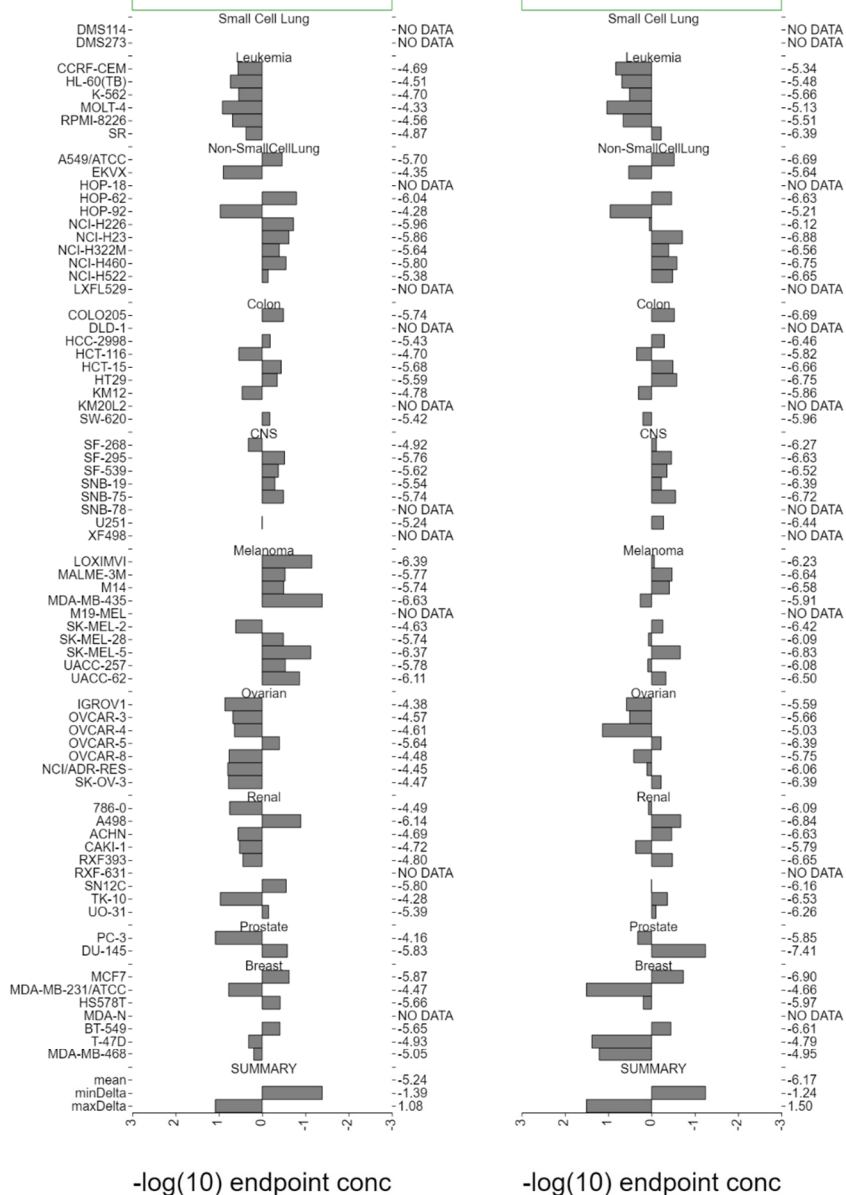

Figure S64



# COMPARE Analysis of NQO1 to 21b (NSC783641)

---SEED---

MoltId:MT22 Genecard:NQO1 TargetSet:MOLTID\_MT\_SERIES

---TARGET---

NSC:S783641 Endpoint:GI50 ExpId:AVGDATAlogHiConc:-4.0

Id: 314263 Count Experiments:2

Correlation:0.66

JobId: 3646587695121137667

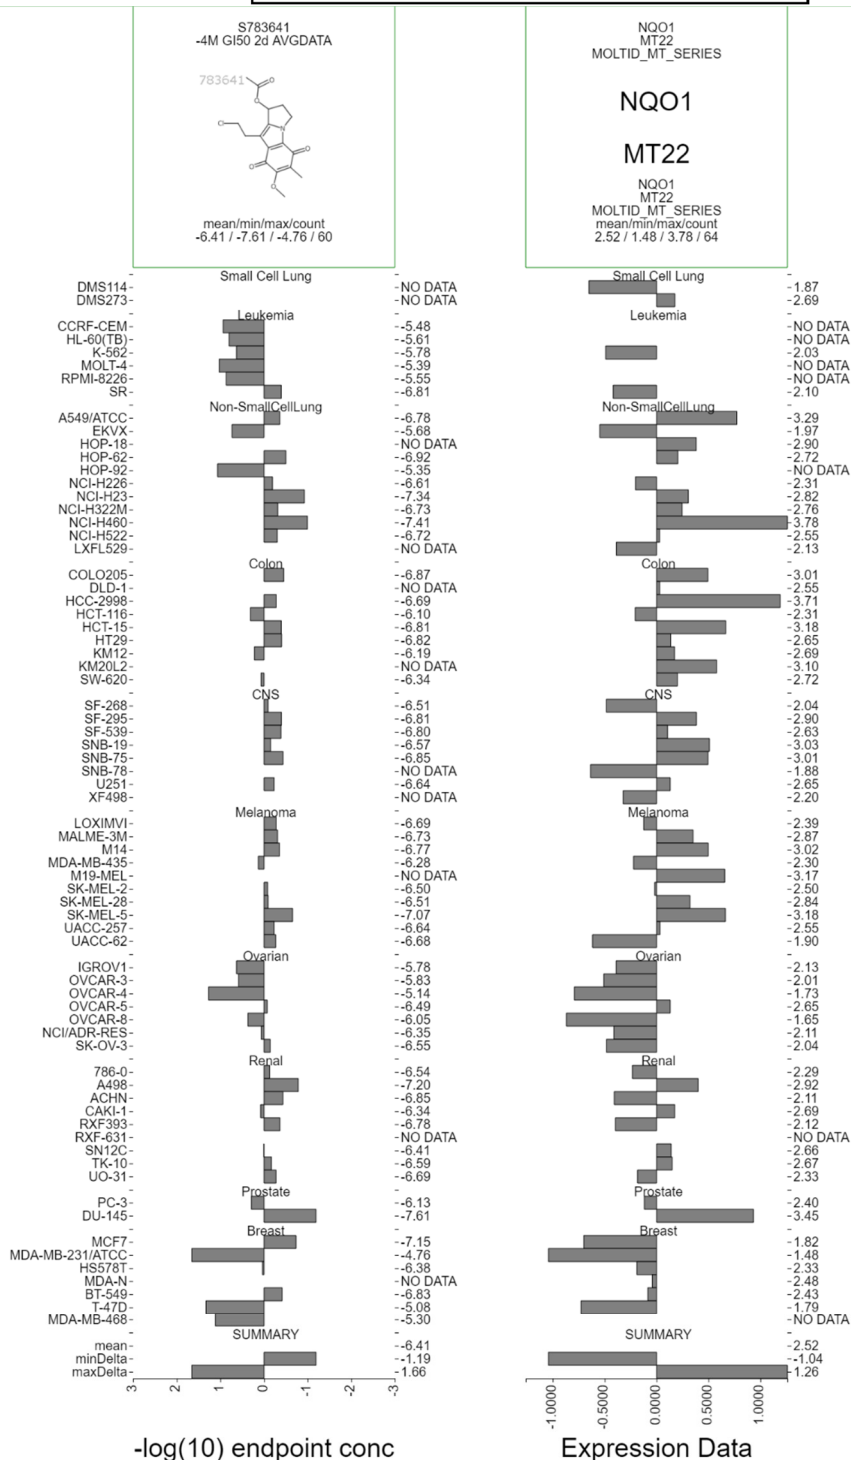

Figure S65

# COMPARE Analysis of **21b** (NSC783641) to DPIQ (NSC753790)

---SEED---

NSC:S783641 Endpoint:GI50 ExpId:AVGDATA logHiConc:-4.0  
Id: 314263 Count Experiments: 2

---TARGET---

NSC:S753790 Endpoint:GI50 ExpId:AVGDATA logHiConc:-4.0  
Id: 373263 Count Experiments: 2

Correlation: 0.66

JobId: 3646587695121137667

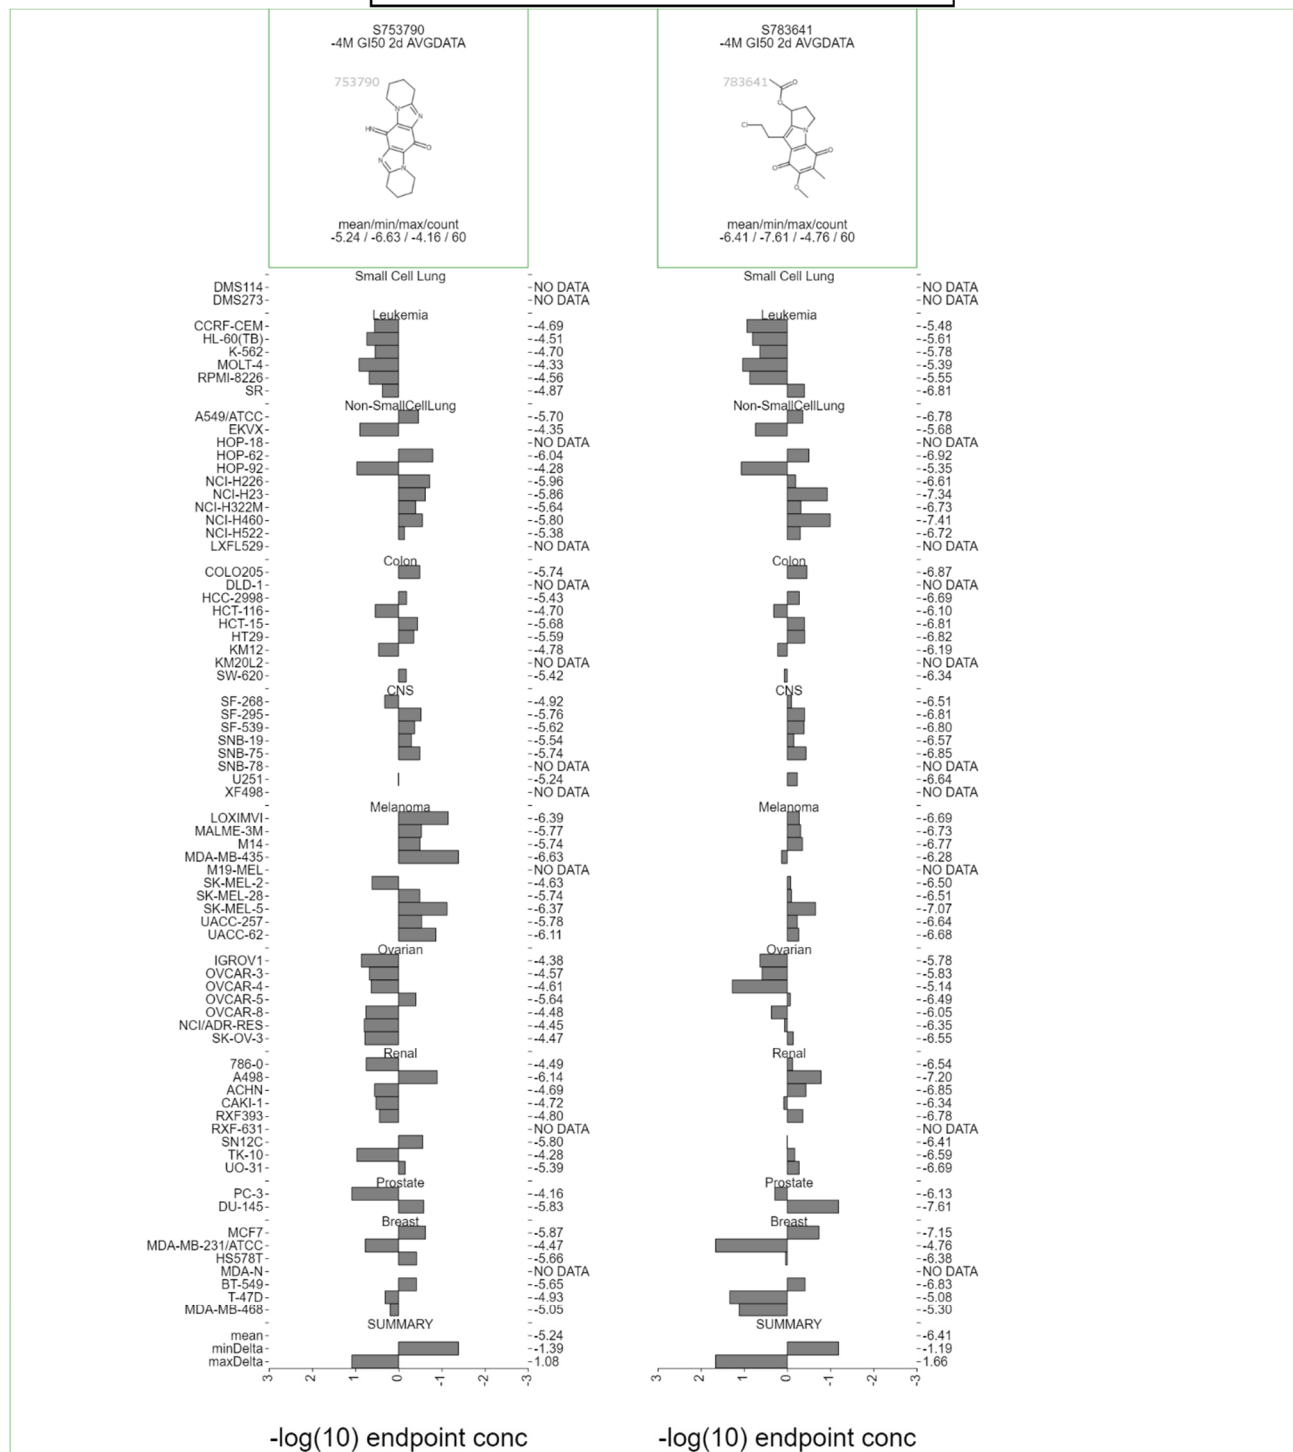

Figure S66

COMPARE Analysis of NQO1 to 5a (NSC768093)

---SEED---

MoltId:MT22 Genecard:NQO1 TargetSet:MOLTID\_MT\_SERIES

---TARGET---

NSC:5768093 Endpoint:GI50 ExpId:AVGDATA logHiConc:-4.0  
Id: 253700 Count Experiments:2

Correlation:-0.37

JobId: 2580018557142257876

S768093  
-4M GI50 2d AVGDATA

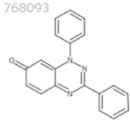

mean/min/max/count  
-5.71 / -6.56 / -4.74 / 59

NQO1  
MT22  
MOLTID\_MT\_SERIES

NQO1

MT22

NQO1  
MT22  
MOLTID\_MT\_SERIES  
mean/min/max/count  
2.52 / 1.48 / 3.78 / 64

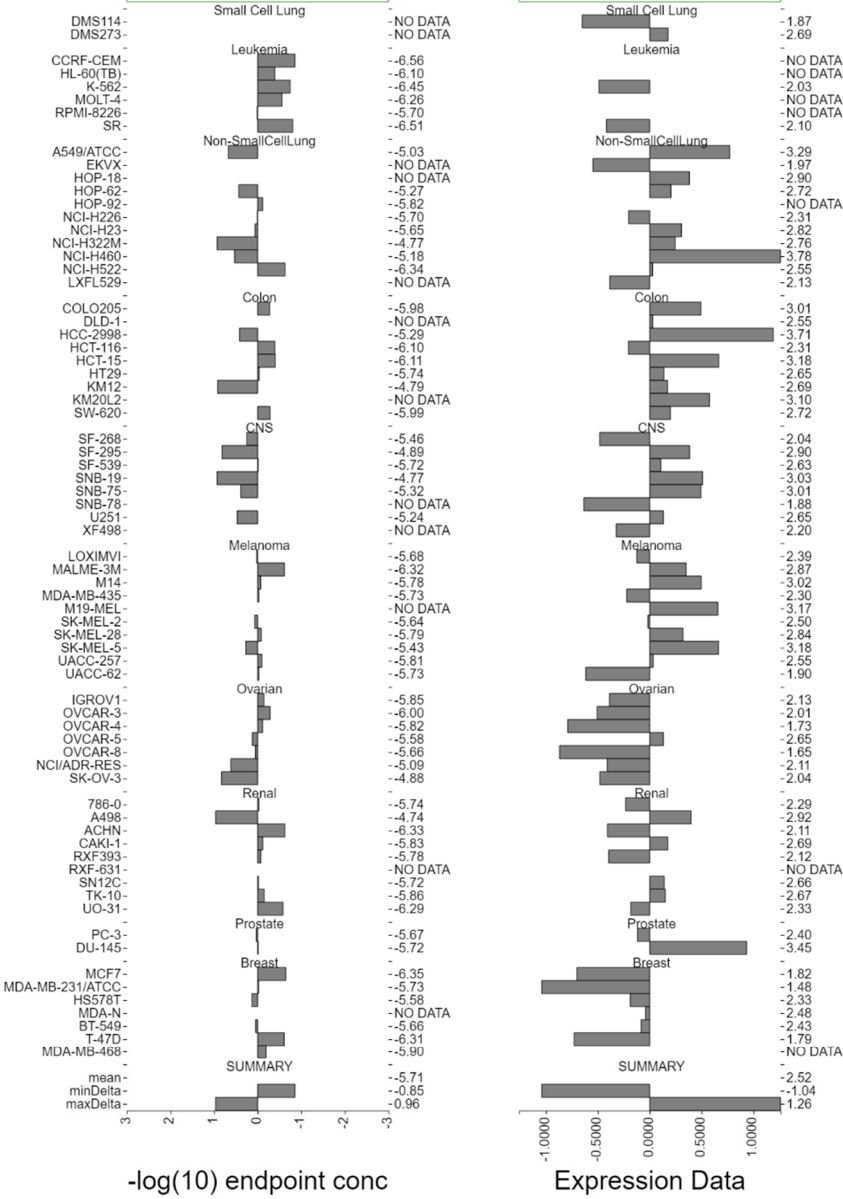

Figure S67

# COMPARE Analysis of NQO1 to 5b (NSC780813)

---SEED---

MoltId:MT22 Genecard:NQO1 TargetSet:MOLTID\_MT\_SERIES

---TARGET---

NSC:780813 Endpoint:GI50 ExpId:AVGDATA logHiConc:-4.0

Id: 314185 Count Experiments:1

Correlation:-0.30

JobId: 7799368897062004237

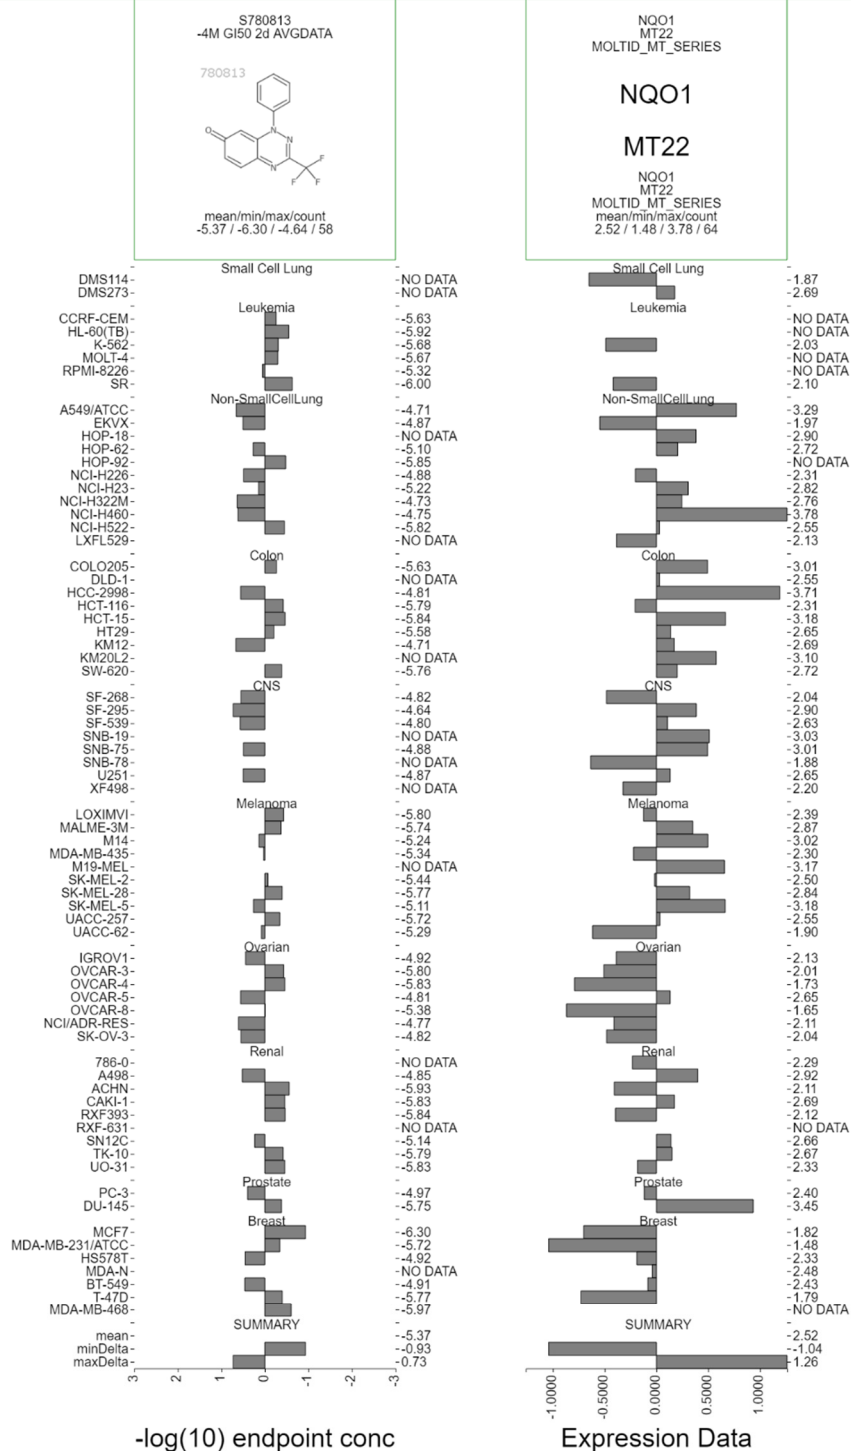

Figure S68

# COMPARE Analysis of NQO1 to Pleurotin (NSC401005)

---SEED---

MoltId:MT22 Genecard:NQO1 TargetSet:MOLTID\_MT\_SERIES

---TARGET---

NSC:S401005 Endpoint:GI50 ExpId:AVGDATAlogHiConc:-4.0  
Id: 243481 CountExperiments:2

Correlation:-0.27

JobId: 5196849035899921588

S401005  
-4M GI50 2d AVGDATA

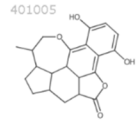

mean/min/max/count  
-4.88 / -5.70 / -4.00 / 60

NQO1  
MT22  
MOLTID\_MT\_SERIES

NQO1

MT22

NQO1  
MT22  
MOLTID\_MT\_SERIES  
mean/min/max/count  
2.52 / 1.48 / 3.78 / 64

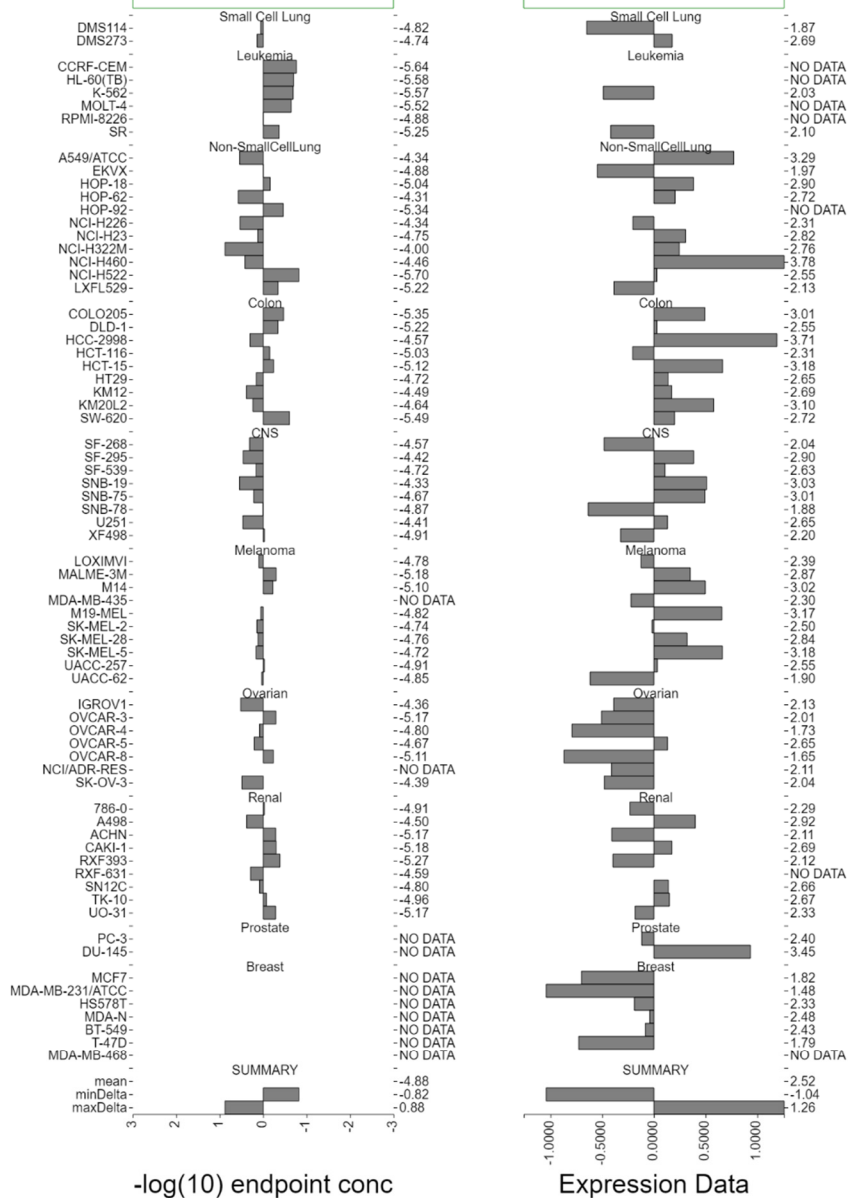

Figure S69

# COMPARE Analysis of NQO1 to 14b (NSC668844)

---SEED---

MoltId:MT22 Genecard:NQO1 TargetSet:MOLTID\_MT\_SERIES

---TARGET---

NSC:S668844 Endpoint:GI50 ExpId:AVGDATAlogHiConc:-4.0  
Id: 426305 CountExperiments:3

Correlation:-0.48

JobId: 3829946830593806600

S668844  
-4M GI50 2d AVGDATA

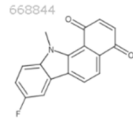

mean/min/max/count  
-4.98 / -6.26 / -4.18 / 60

NQO1  
MT22  
MOLTID\_MT\_SERIES

NQO1

MT22

NQO1  
MT22  
MOLTID\_MT\_SERIES  
mean/min/max/count  
2.52 / 1.48 / 3.78 / 64

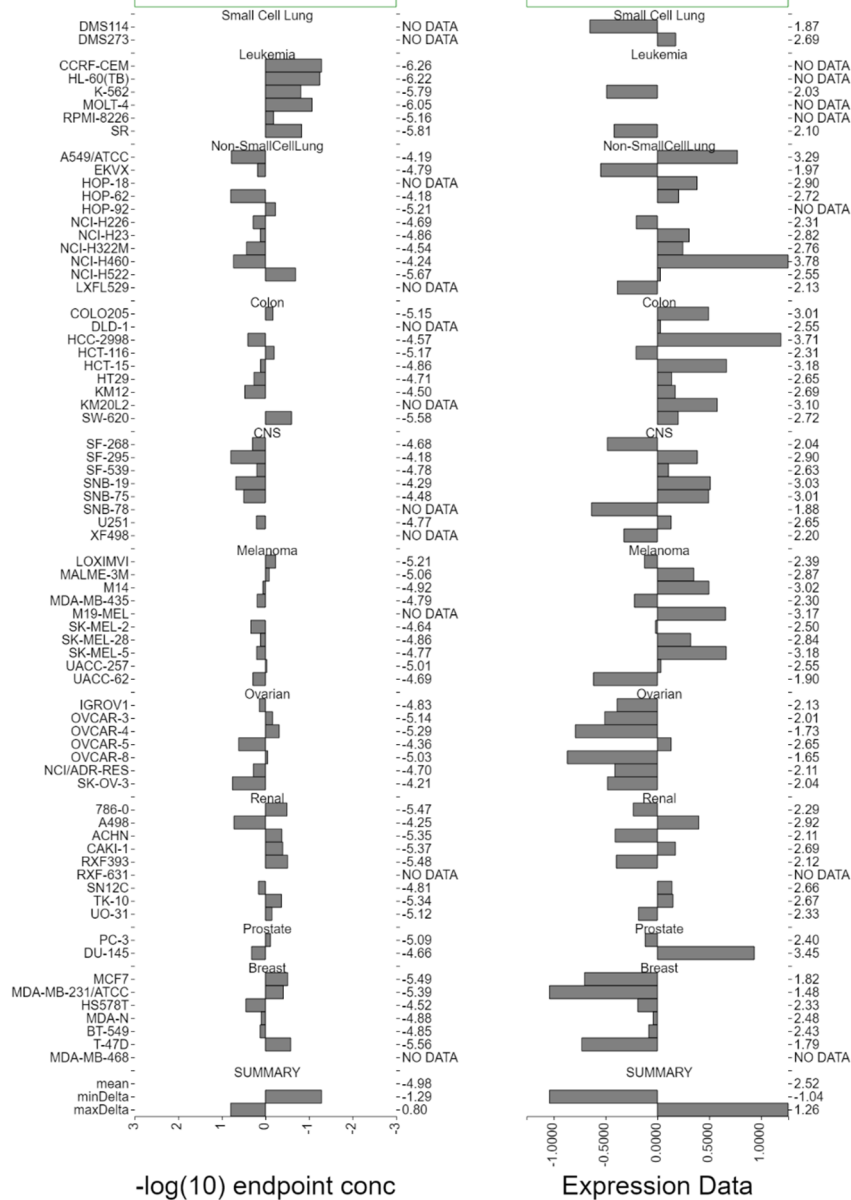

Figure S70

# COMPARE Analysis of NQO1 to Kalafungin (NSC137443)

---SEED---

MoltId:MT22 Genecard:NQO1 TargetSet:MOLTID\_MT\_SERIES

---TARGET---

NSC:137443 Endpoint:GI50 ExpId:AVGDATAlogHiConc:-4.0

Id: 71608 CountExperiments:2

Correlation:-0.27

JobId: 7682632898986498469

S137443  
-4M GI50 2d AVGDATA

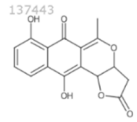

mean/min/max/count  
-7.03 / -7.78 / -5.87 / 60

NQO1  
MT22  
MOLTID\_MT\_SERIES

NQO1

MT22

NQO1  
MT22  
MOLTID\_MT\_SERIES  
mean/min/max/count  
2.52 / 1.48 / 3.78 / 64

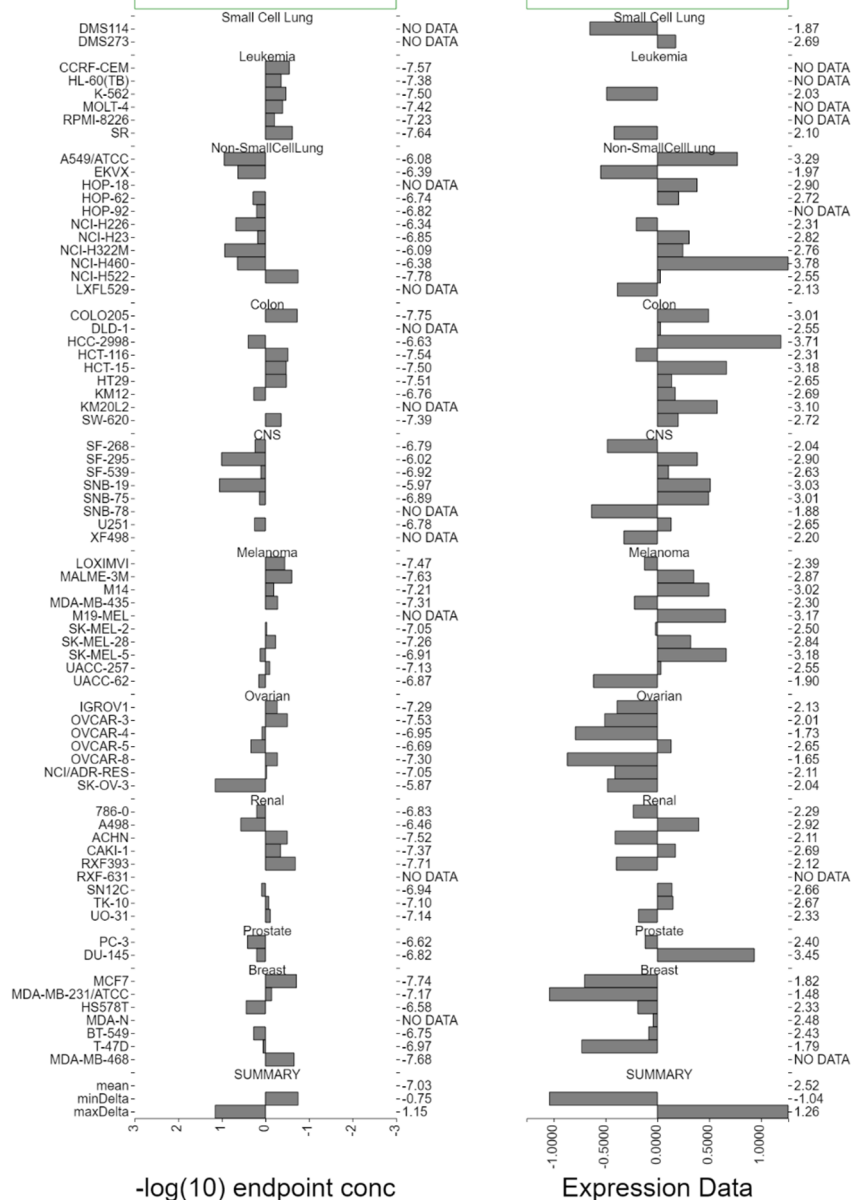

Figure S71

# COMPARE Analysis of NQO1 to Discorhabdin C (NSC626162)

---SEED---

MoltId:MT22 Genecard:NQO1 TargetSet:MOLTID\_MT\_SERIES

---TARGET---

NSC:626162 Endpoint:GI50 Expld:AVGDATAlogHiConc:-4.0

Id: 421973 Count Experiments:5

Correlation:-0.29

JobId: 3262975264366953011

S626162  
-4M GI50 2d AVGDATA

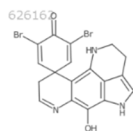

mean/min/max/count  
-6.85 / -7.89 / -5.63 / 68

NQO1  
MT22  
MOLTID\_MT\_SERIES

NQO1

MT22

NQO1  
MT22  
MOLTID\_MT\_SERIES  
mean/min/max/count  
2.52 / 1.48 / 3.78 / 64

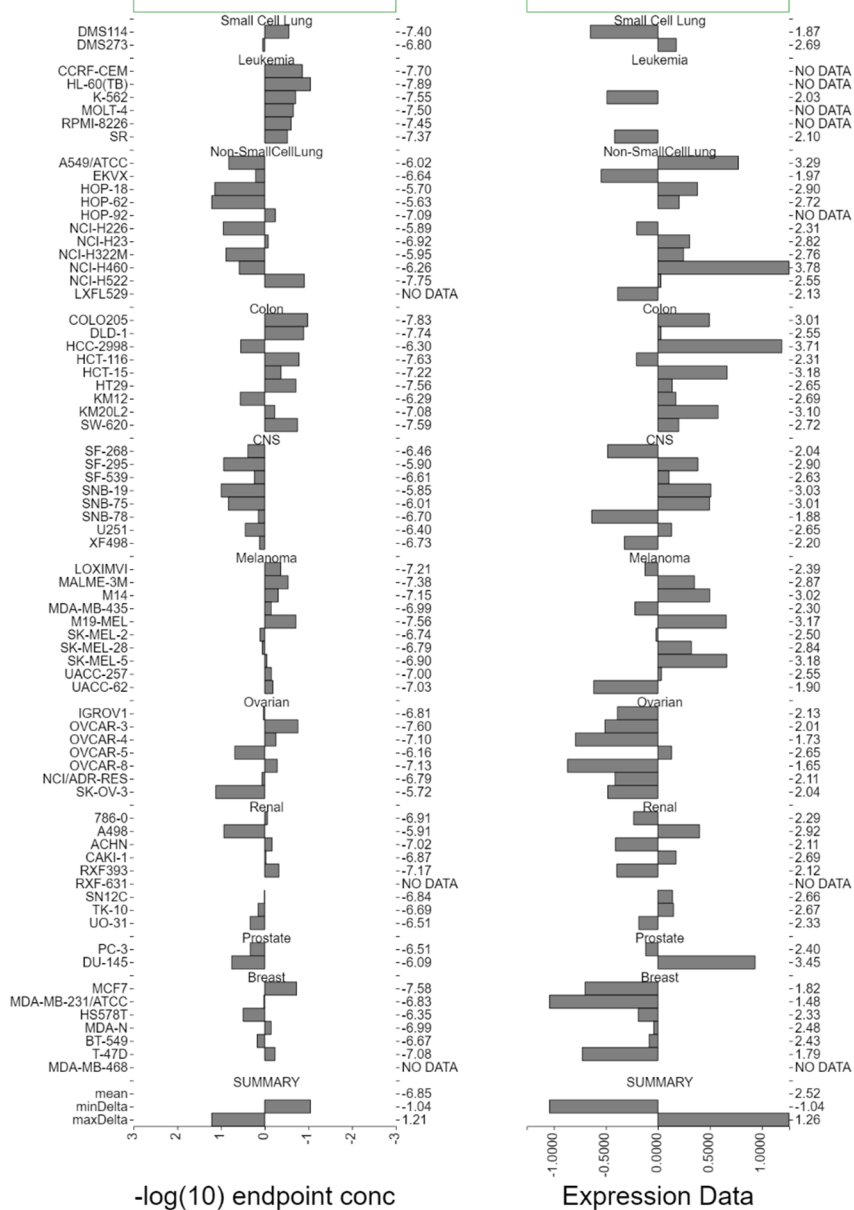

Figure S72



# COMPARE Analysis of TrxR to 5a (NSC768093)

---SEED---

MolId:MT143 Genecard:TXNRD1 TargetSet:MOLTID\_MT\_SERIES

---TARGET---

NSC:S768093 Endpoint:GI50 ExpId:AVGDATA logHiConc:-4.0

Id: 253700 CountExperiments:2

Correlation: -0.24

JobId: 766082888249896201

S768093  
-4M GI50 2d AVGDATA

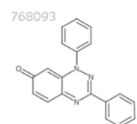

mean/min/max/count  
-5.71 / -6.56 / -4.74 / 59

TXNRD1  
MT143  
MOLTID\_MT\_SERIES

TXNRD1

MT143

TXNRD1  
MT143  
MOLTID\_MT\_SERIES  
mean/min/max/count  
3.72 / undefined / 14.30 / 59

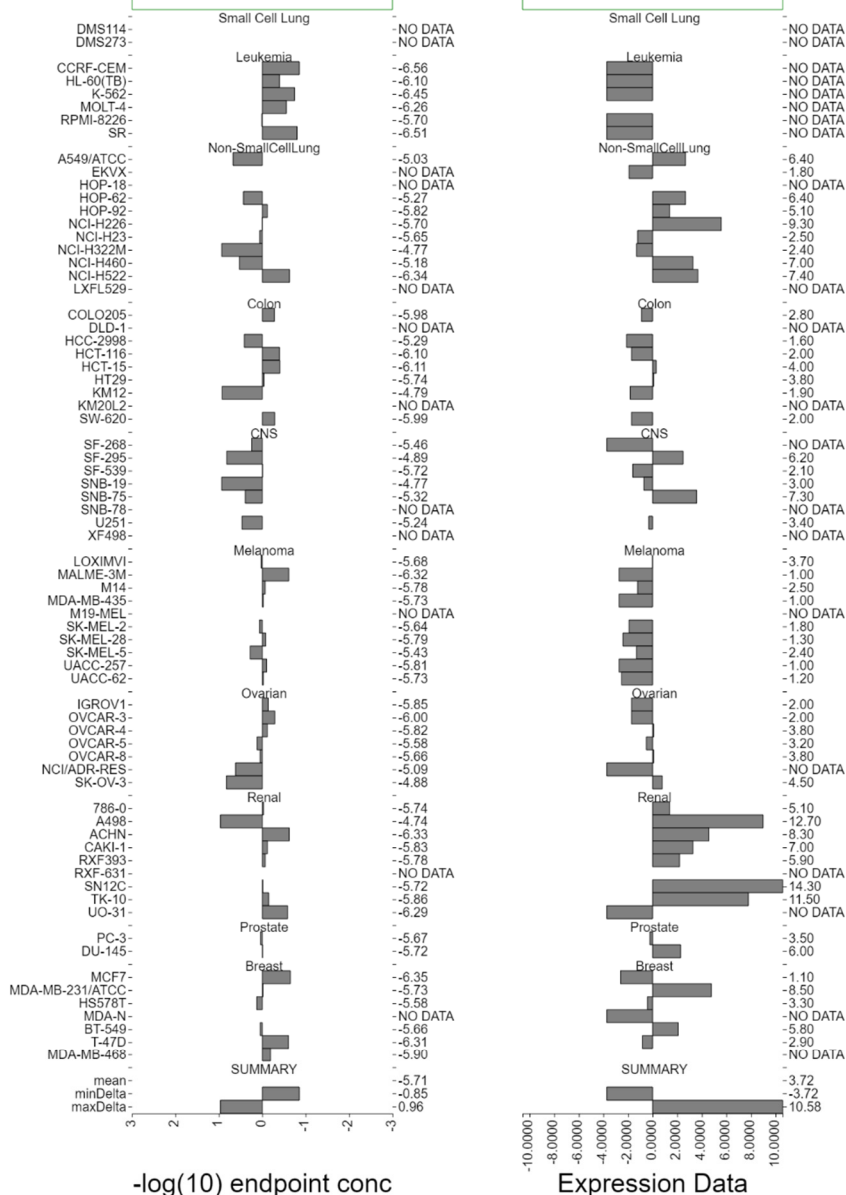

Figure S73

# COMPARE Analysis of TrxR to 5b (NSC780813)

---SEED---

MolId:MT143 Genecard:TXNRD1 TargetSet:MOLTID\_MT\_SERIES

---TARGET---

NSC:S780813 Endpoint:GI50 ExpId:AVGDATA logHiConc:-4.0

Id: 314185 CountExperiments:1

Correlation: -0.12

JobId: 4305186664534873894

S780813  
-4M GI50 2d AVGDATA

780813

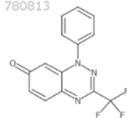

mean/min/max/count  
-5.37 / -6.30 / -4.64 / 58

TXNRD1  
MT143  
MOLTID\_MT\_SERIES

TXNRD1

MT143

TXNRD1  
MT143  
MOLTID\_MT\_SERIES  
mean/min/max/count  
3.72 / undefined / 14.30 / 59

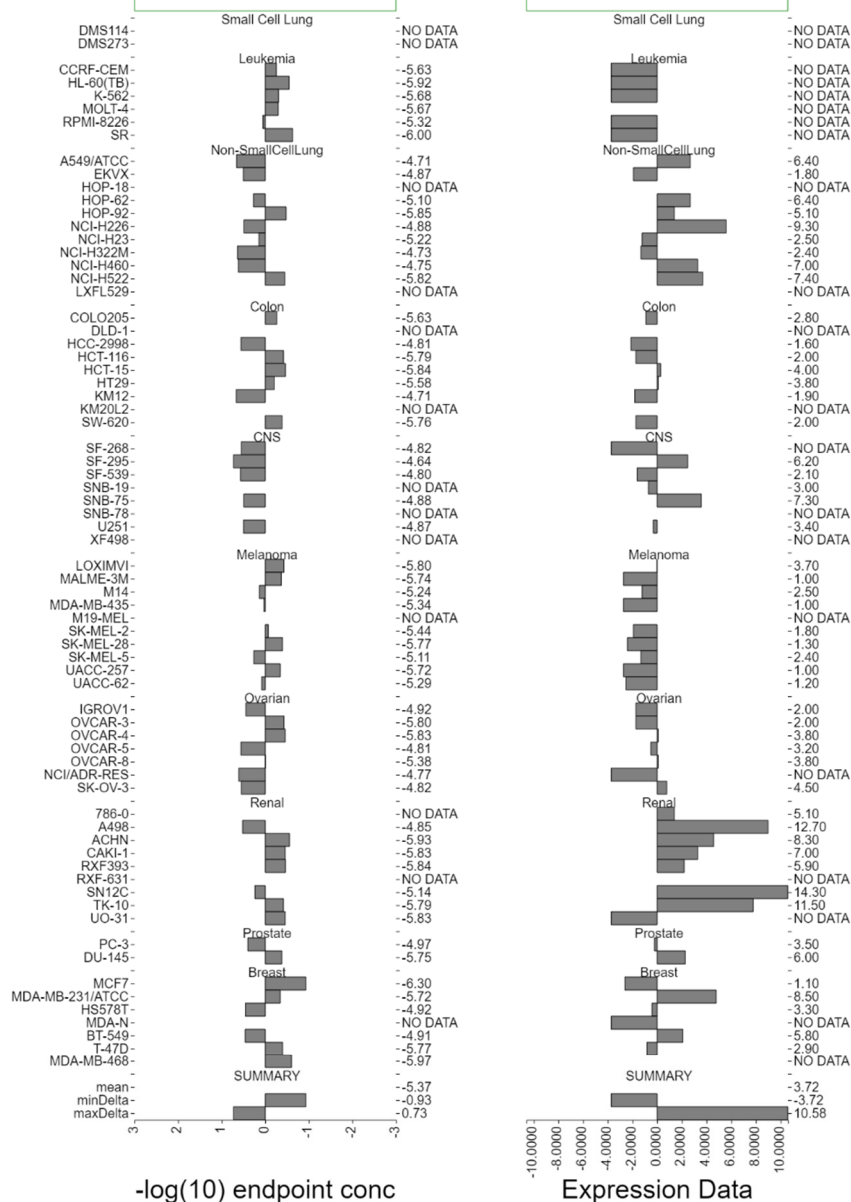

Figure S74

# COMPARE Analysis of TrxR to Pleurotin (NSC401005)

---SEED---

MolId:MT143 Genecard:TXNRD1 TargetSet:MOLTID\_MT\_SERIES

---TARGET---

NSC:S401005 Endpoint:GI50 ExpId:AVGDATA logHiConc:-4.0  
Id: 243481 CountExperiments:2

Correlation:-0.21

JobId: 1840548376507877519

S401005  
-4M GI50 2d AVGDATA

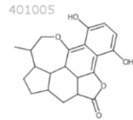

mean/min/max/count  
-4.88 / -5.70 / -4.00 / 60

TXNRD1  
MT143  
MOLTID\_MT\_SERIES

TXNRD1  
MT143

TXNRD1  
MT143  
MOLTID\_MT\_SERIES  
mean/min/max/count  
3.72 / undefined / 14.30 / 59

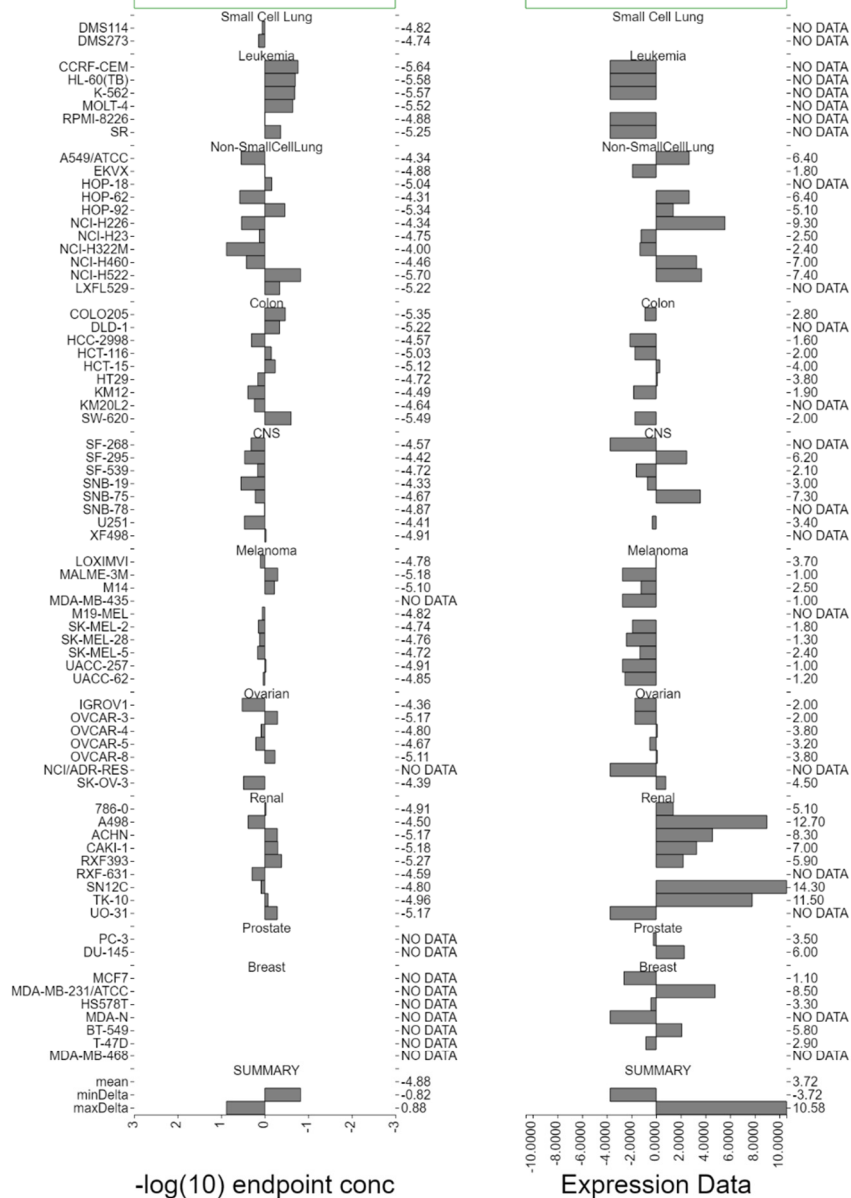

Figure S75

# COMPARE Analysis of TrxR to14b (NSC668844)

---SEED---

MolId:MT143 Genecard:TXNRD1 TargetSet:MOLTID\_MT\_SERIES

---TARGET---

NSC:5668844 Endpoint:GI50 ExpId:AVGDATA logHiConc:-4.0  
Id: 426305 CountExperiments:3

Correlation:-0.22

JobId: 1113719844959210894

S668844  
-4M GI50 2d AVGDATA

668844

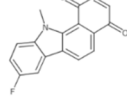

mean/min/max/count  
-4.98 / -6.26 / -4.18 / 60

TXNRD1  
MT143  
MOLTID\_MT\_SERIES

TXNRD1

MT143

TXNRD1  
MT143  
MOLTID\_MT\_SERIES  
mean/min/max/count  
3.72 / undefined / 14.30 / 59

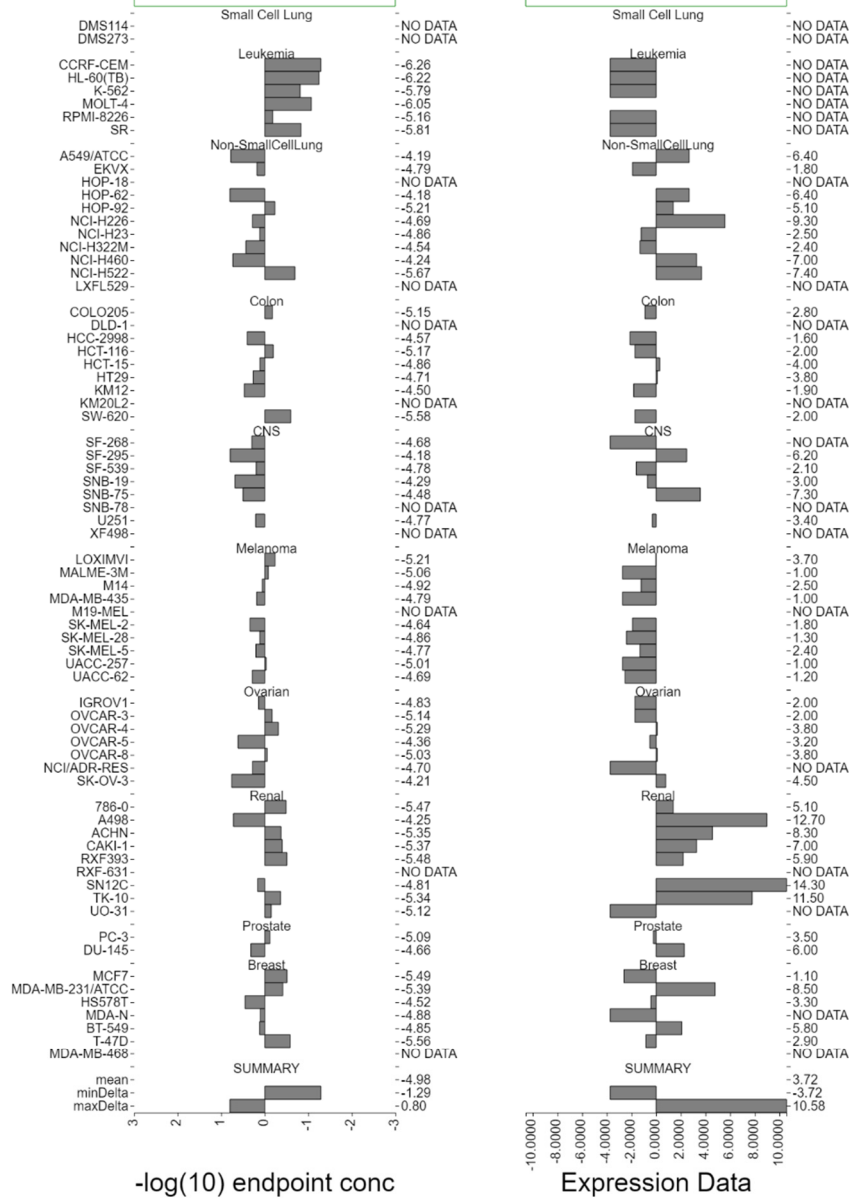

Figure S76

# COMPARE Analysis of TrxR to Kalafungin (NSC137443)

---SEED---

MolId:MT143 Genecard:TXNRD1 TargetSet:MOLTID\_MT\_SERIES

---TARGET---

NSC:S137443 Endpoint:GI50 ExpId:AVGDATA logHiConc:-4.0

Id: 71608 Count Experiments:2

Correlation: -0.24

JobId: 2893728923787660700

S137443  
-4M GI50 2d AVGDATA

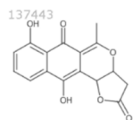

mean/min/max/count  
-7.03 / -7.78 / -5.87 / 60

TXNRD1  
MT143  
MOLTID\_MT\_SERIES

TXNRD1

MT143

TXNRD1  
MT143  
MOLTID\_MT\_SERIES  
mean/min/max/count  
3.72 / undefined / 14.30 / 59

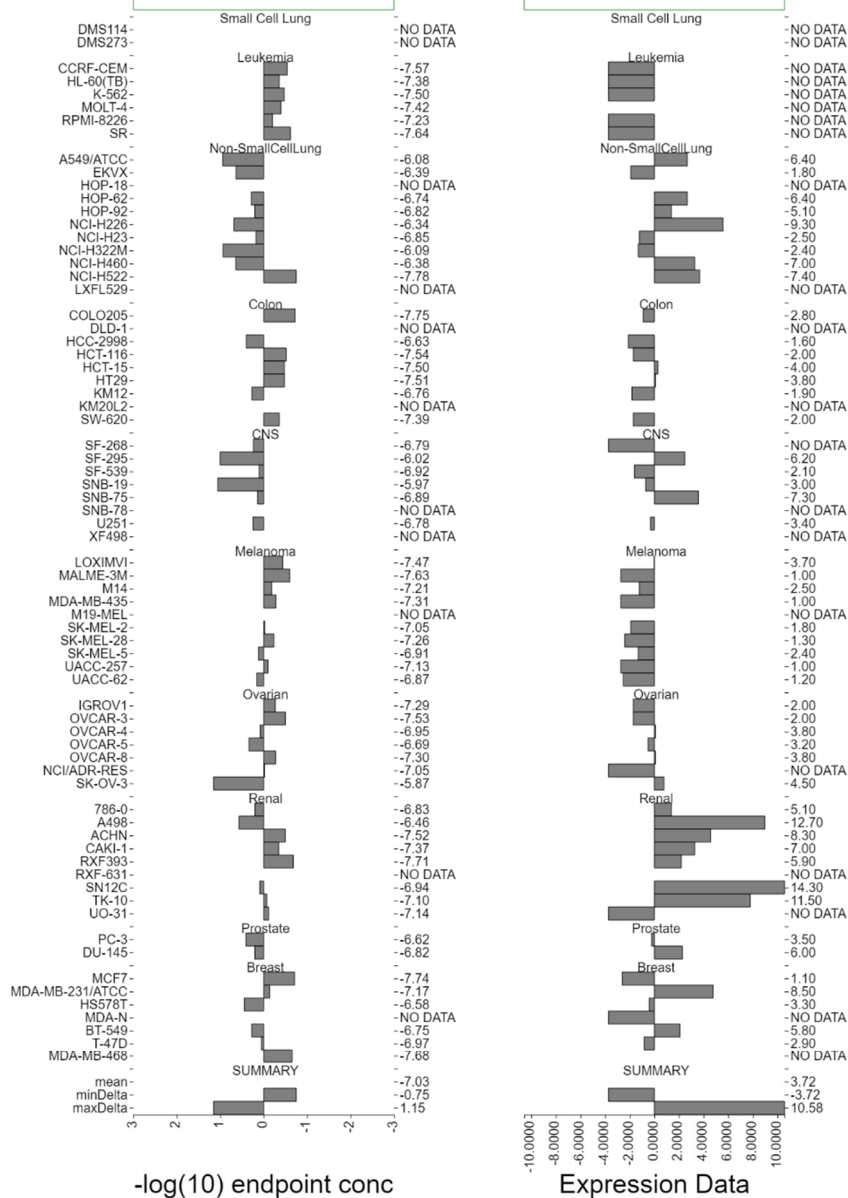

Figure S77

# COMPARE Analysis of TrxR to Discorhabdin C (NSC626162)

---SEED---

MolId:MT143 Genecard:TXNRD1 TargetSet:MOLTID\_MT\_SERIES

---TARGET---

NSC:S626162 Endpoint:GI50 ExpId:AVGDATA logHiConc:-4.0

Id: 421973 CountExperiments:5

Correlation: -0.37

JobId: 3192043257499528905

S626162  
-4M GI50 2d AVGDATA

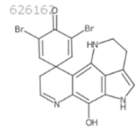

mean/min/max/count  
-6.85 / -7.89 / -5.63 / 68

TXNRD1  
MT143  
MOLTID\_MT\_SERIES

TXNRD1

MT143

TXNRD1  
MT143  
MOLTID\_MT\_SERIES  
mean/min/max/count  
3.72 / undefined / 14.30 / 59

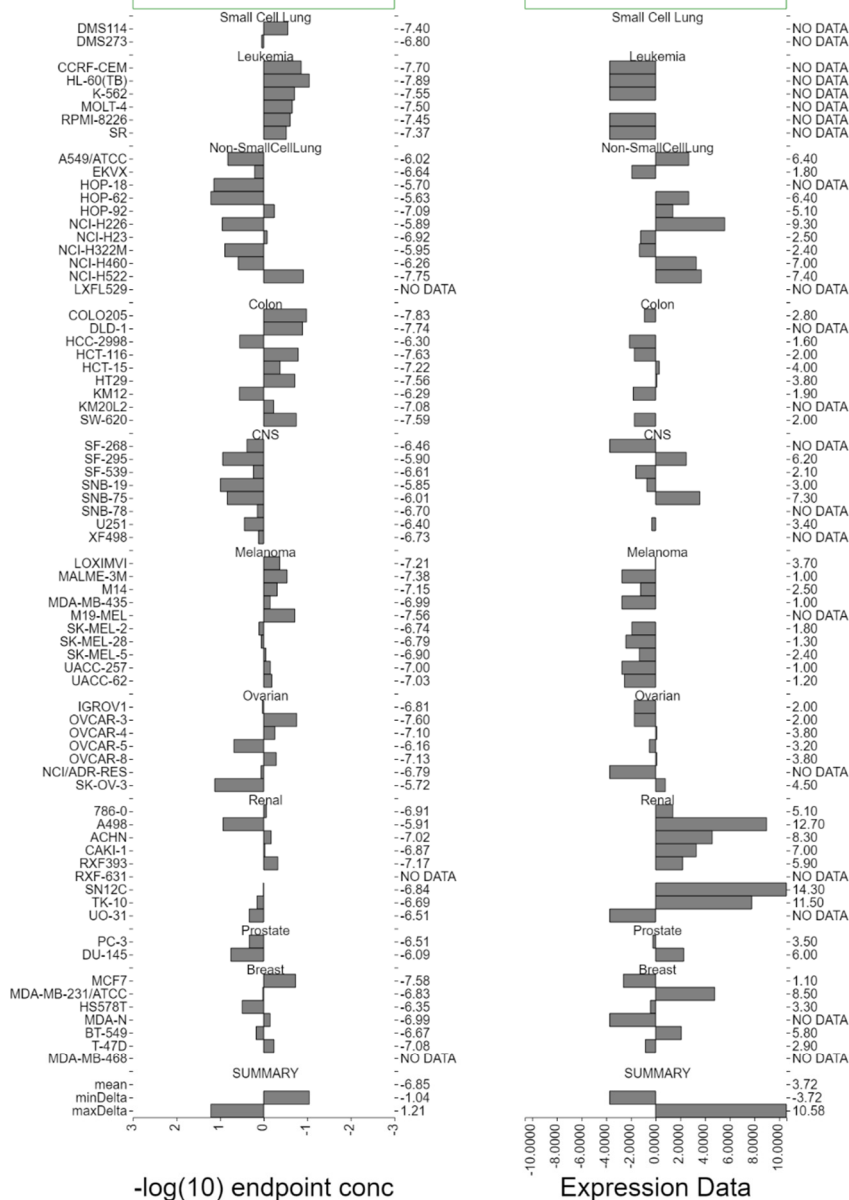

Figure S78

# COMPARE Analysis of TrxR to DPIQ (NSC753790)

---SEED---

MolId:MT143 Genecard:TXNRD1 TargetSet:MOLTID\_MT\_SERIES

---TARGET---

NSC:S753790 Endpoint:GI50 ExpId:AVGDATA logHiConc:-4.0  
Id: 373263 Count Experiments:2

Correlation:0.12

JobId: 2313037008200469252

S753790  
-4M GI50 2d AVGDATA

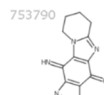

mean/min/max/count  
-5.24 / -6.63 / -4.16 / 60

TXNRD1  
MT143  
MOLTID\_MT\_SERIES

TXNRD1  
MT143

TXNRD1  
MT143  
MOLTID\_MT\_SERIES  
mean/min/max/count  
3.72 / undefined / 14.30 / 59

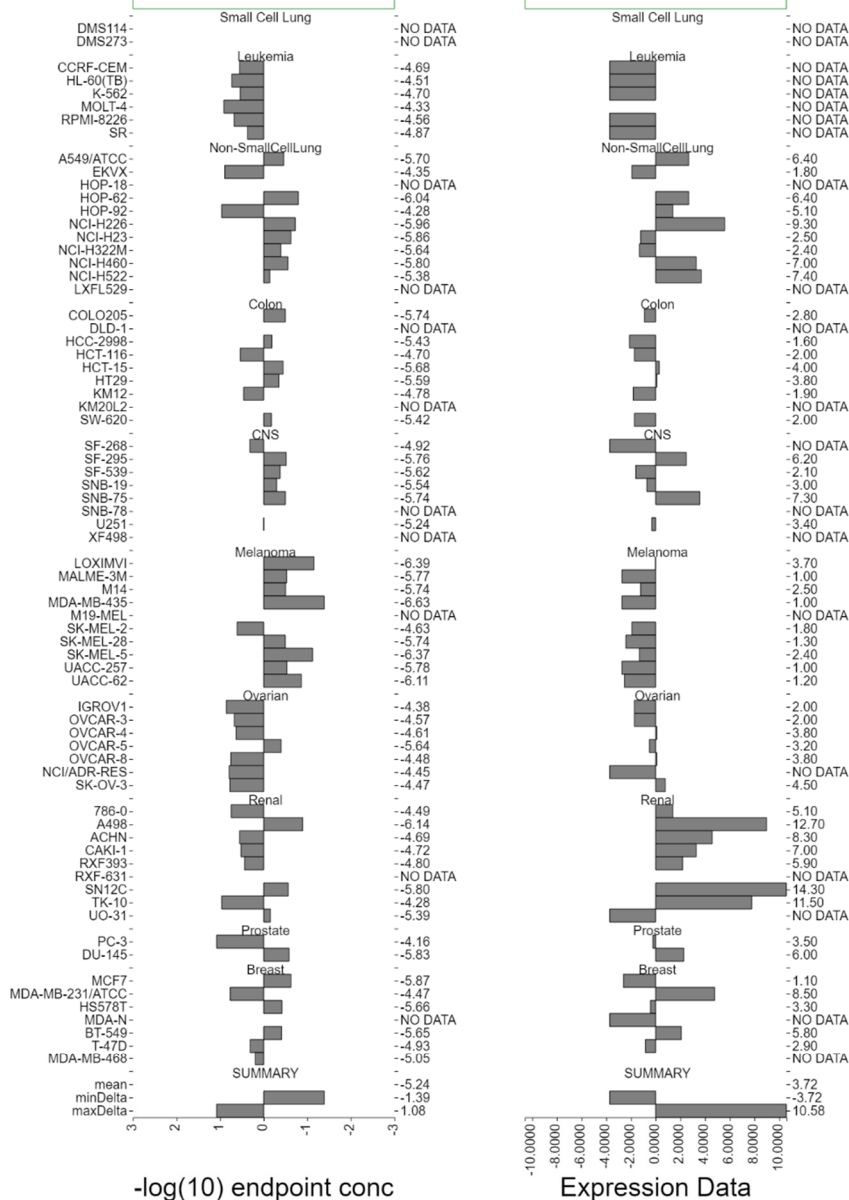

Figure S79

# COMPARE Analysis of TrxR to 3a (NSC84167)

---SEED---

MolId:MT143 Genecard:TXNRD1 TargetSet:MOLTID\_MT\_SERIES

---TARGET---

NSC:S84167 Endpoint:GI50 ExpId:AVGDATA logHiConc:-4.0

Id: 372937 Count Experiments:2

Correlation:0.11

JobId: 6979304215872694200

S84167  
-4M GI50 2d AVGDATA

84167

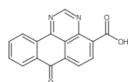

mean/min/max/count  
-4.98 / -6.29 / -4.00 / 60

TXNRD1  
MT143  
MOLTID\_MT\_SERIES

TXNRD1

MT143

TXNRD1  
MT143  
MOLTID\_MT\_SERIES  
mean/min/max/count  
3.72 / undefined / 14.30 / 59

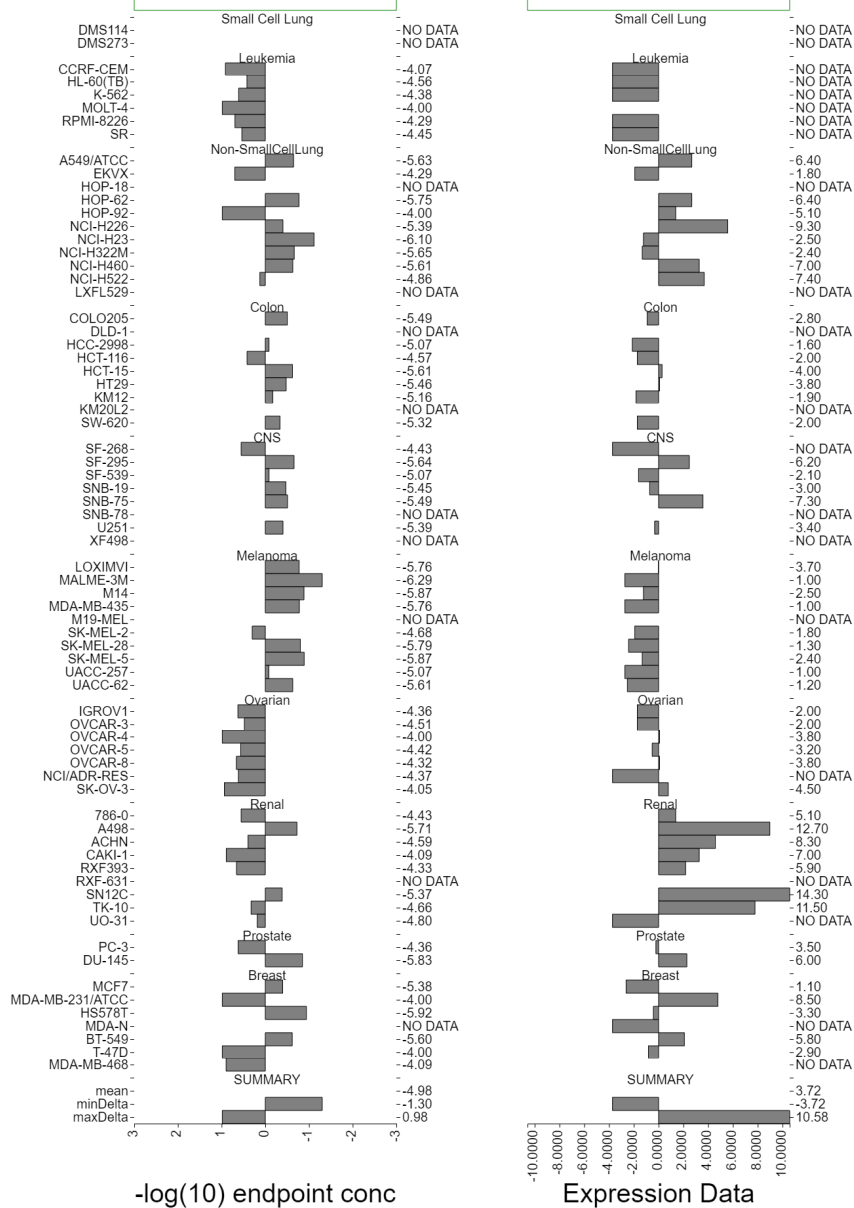

Figure S80



# COMPARE Analysis of TrxR to 4 (NSC94945)

---SEED---

MolId:MT143 Genecard:TXNRD1 TargetSet:MOLTID\_MT\_SERIES

---TARGET---

NSC:S94945 Endpoint:GI50 ExpId:AVGDATA logHiConc:-4.0

Id: 11715 CountExperiments:2

Correlation:-0.15

JobId: 9112064582006927938

S94945  
-4M GI50 2d AVGDATA

94945

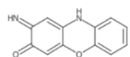

mean/min/max/count  
-5.44 / -6.29 / -4.35 / 59

TXNRD1  
MT143  
MOLTID\_MT\_SERIES

TXNRD1

MT143

TXNRD1  
MT143  
MOLTID\_MT\_SERIES  
mean/min/max/count  
3.72 / undefined / 14.30 / 59

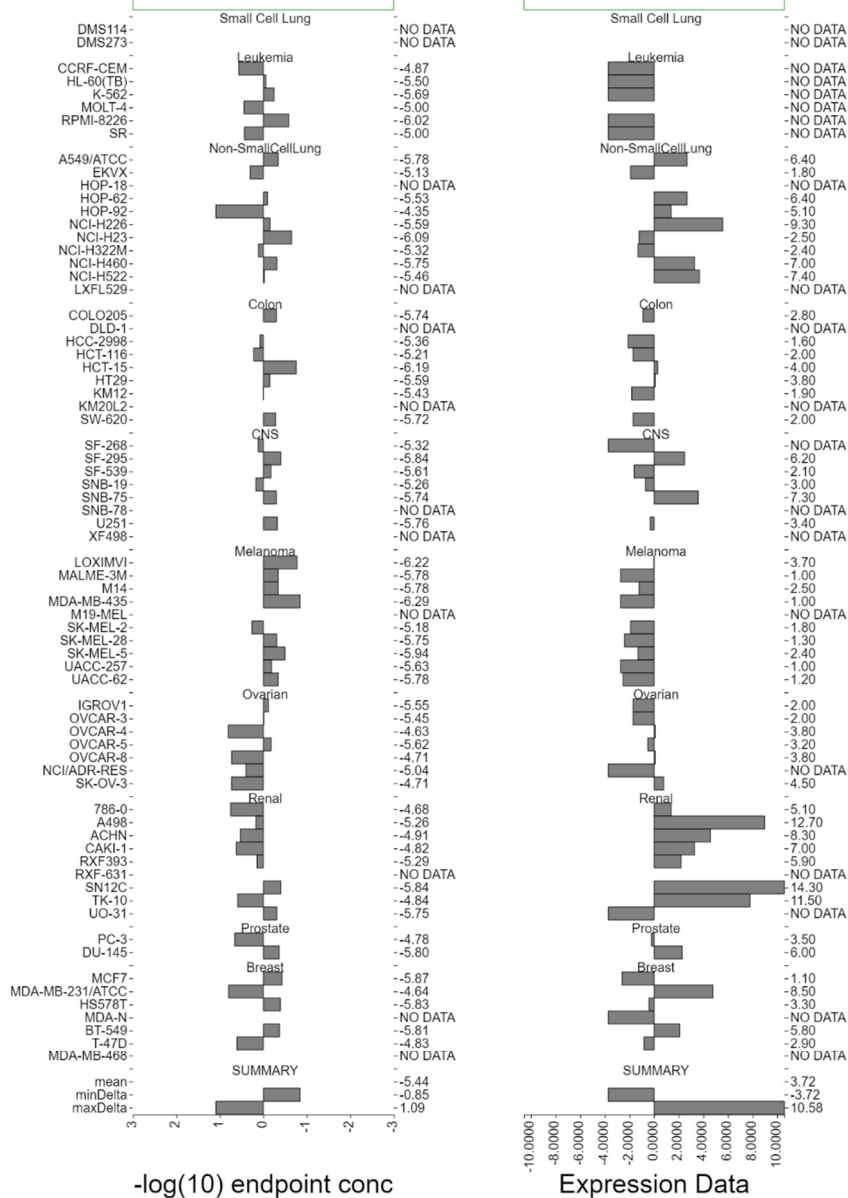

Figure S81

COMPARE Analysis of TrxR to 19 (NSC409304)

---SEED---

MolId:MT143 Genecard:TXNRD1 TargetSet:MOLTID\_MT\_SERIES

---TARGET---

NSC:S409304 Endpoint:GI50 ExpId:AVGDATA logHiConc:-4.0

Id: 251495 Count Experiments:1

Correlation:0.10

JobId: 8407460412331887372

S409304  
-4M GI50 2d AVGDATA

409304

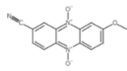

mean/min/max/count  
-5.44 / -6.67 / -4.33 / 55

TXNRD1  
MT143  
MOLTID\_MT\_SERIES

TXNRD1

MT143

TXNRD1  
MT143  
MOLTID\_MT\_SERIES  
mean/min/max/count  
3.72 / undefined / 14.30 / 59

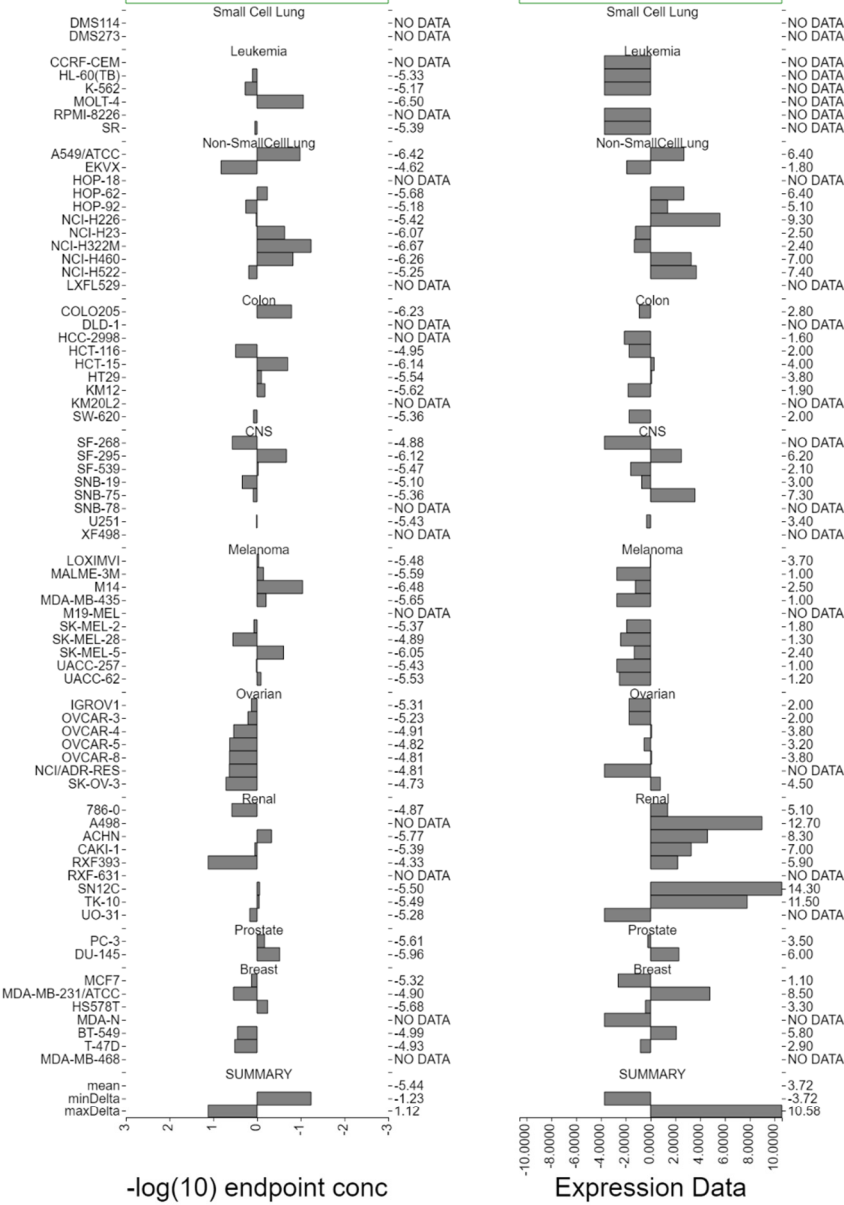

Figure S82
